# Supplementary material for: A genome-wide association study of social trust in 33,882 Danish blood donors
Source: PubMed Central journal article supplement (PMC10792163; doi:10.1038/s41598-024-51636-0), 2024-01-16
Supplement: 41598_2024_51636_MOESM2_ESM.pdf [file 41598_2024_51636_MOESM2_ESM.pdf]

## A genome-wide association study of social trust in 33,882 Danish Blood Donors

Celia Burgos Sequeros<sup>1</sup>, Thomas Folkmann Hansen<sup>1,2</sup>, David Westergaard<sup>1,3,4</sup>, Ioannis Louloudis<sup>1</sup>, Sebastian Kalamajski<sup>5</sup>, Timo Röder<sup>1</sup>, Palle Duun Rohde<sup>6</sup>, Michael Schwinn<sup>7</sup>, Line Harder Clemmensen<sup>8</sup>, Maria Didriksen<sup>7</sup>, Mette Nyegaard<sup>6</sup>, Henrik Hjalgrim<sup>9,10</sup>, Kaspar René Nielsen<sup>11</sup>, Mie Topholm Bruun<sup>12</sup>, Sisse Rye Ostrowski<sup>7,10</sup>, Christian Erikstrup<sup>13,14</sup>, Susan Mikkelsen<sup>13</sup>, Erik Sørensen<sup>7</sup>, DBDS genomic consortium, Ole Birger Vestager Pedersen<sup>10,11</sup>, Søren Brunak<sup>1</sup>, Karina Banasik<sup>\*,§,1,4</sup>, Giuseppe Nick Giordano<sup>§,5</sup>

1. Translational Disease Systems Biology, Novo Nordisk Foundation Center for Protein Research, Faculty of Health and Medical Sciences, University of Copenhagen, Copenhagen, Denmark

2. Department of Neurology, Danish Headache Center Copenhagen University Hospital - Rigshospitalet, Glostrup, Denmark

3. Methods and Analysis, Statistics Denmark, Copenhagen, Denmark

4. Department of Gynecology and Obstetrics, Copenhagen University Hospital Hvidovre, Copenhagen, Denmark

5. Genetic and Molecular Epidemiology Unit, Lund University Diabetes Centre, Department of Clinical Sciences, CRC, Malmö, Sweden

6. Genomic Medicine, Department of Health Science and Technology, Aalborg University, Gistrup, Denmark

7. Department of Clinical Immunology, Copenhagen University Hospital - Rigshospitalet, Copenhagen, Denmark

8. Department of Applied Mathematics and Computer Science, Technical University of Denmark, Kongens Lyngby, Denmark

9. The Danish Cancer Institute; Department of Epidemiology Research, Statens Serum Institut; Department of Haematology, Rigshospitalet, Denmark

10. Department of Clinical Medicine, Faculty of Health and Medical Sciences, University of Copenhagen, Copenhagen, Denmark

11. Department of Clinical Immunology, Zealand University Hospital, Køge, Denmark

12. Clinical Immunology Research Unit, Department of Clinical Immunology, Odense University Hospital, Odense, Denmark

13. Department of Clinical Immunology, Aarhus University Hospital, Aarhus, Denmark

14. Department of Clinical Medicine, Aarhus University, Aarhus, Denmark

\*Corresponding author: Karina Banasik, karina.banasik@cpr.ku.dk

§Authors contributed equally

## Supplementary Tables

**Supplementary Table 1.** Levels of social trust measured in a random Danish sample through the European Social Survey (ESS).

**Supplementary Table 2.** Variant quality check of top associations with social trust.

**Supplementary Table 3.** Summary of MAGMA gene-level association analysis as computed by FUMA.

**Supplementary Table 4.** Summary of MAGMA gene set-level association analysis as computed by FUMA.

**Supplementary Table 5.** Summary of MAGMA tissue expression analysis as computed by FUMA.

**Supplementary Table 6.** Summary of the enrichment of mapped genes in gene sets as computed by FUMA.

**Supplementary Table 7.** External replication with Wootton at al's top sequence variants associated with social trust.

**Supplementary Table 8.** Studies used for computing genetic correlation with social trust.

**Supplementary Table 9.** Full table of PheWAS associations between discovery sequence variant, rs12776883, and phenotypes found in the GWAS ATLAS resource.

**Supplementary Table 10.** Full table of PheWAS associations between discovery sequence variant, rs12776883, and phenotypes in the Copenhagen Hospital Biobank Cardiovascular Disease Cohort.

**Supplementary Table 11.** Full table of PheWAS associations between meta-analysis sequence variant, rs71543507, and phenotypes found in the GWAS ATLAS resource.

**Supplementary Table 12.** Full table of PheWAS associations between meta-analysis sequence variant, rs71543507, and phenotypes in the Copenhagen Hospital Biobank Cardiovascular Disease Cohort.

**Supplementary Table 13.** Protein interaction network including *PLPP4* as obtained from the STRING database.

**Supplementary Table 14.** Protein annotations of STRING network nodes in Supplementary Table 14.

**Supplementary Table 15.** Protein interaction network including *ACTR3B* as obtained from the STRING database.

**Supplementary Table 16.** Protein annotations of STRING network nodes in Supplementary Table 17.

**Supplementary Table 17.** Member list of the DBDS Genomic Consortium

**Supplementary Table 1.** Levels of trust measured in a random Danish sample through the European Social Survey (ESS). Data was obtained from the ESS Data portal <https://ess-search.nsd.no/>. Questions used to measure trust were the same as those used in our study. The average of the three questions was computed for each ESS study participant and median and quartiles were calculated on those values. Note that, contrary to Figure 1 of the main text, each study participant can have responses in more than one ESS round.

| <b>year</b> | <b>n</b> | <b>median</b> | <b>quartiles</b> |
|-------------|----------|---------------|------------------|
| 2002        | 1506     | 7             | 6, 8             |
| 2004        | 1487     | 7             | 5.67, 8          |
| 2006        | 1505     | 7             | 6, 8             |
| 2008        | 1610     | 7             | 6, 8             |
| 2010        | 1576     | 7             | 6, 7.67          |
| 2012        | 1650     | 7             | 6, 8             |
| 2014        | 1502     | 7             | 6, 7.67          |
| 2018        | 1572     | 7             | 6, 8             |

**Supplementary Table 2.** Variant quality check of top associations with social trust.

Parameters were calculated based on the discovery cohort.

| rsID       | General  |             |     |            | Minor allele frequencies |                                                  |                                | Genotype missingness | Hardy-Weinberg equilibrium |
|------------|----------|-------------|-----|------------|--------------------------|--------------------------------------------------|--------------------------------|----------------------|----------------------------|
|            | A1 (ref) | A2 (effect) | CHR | POS (hg19) | MAF observed             | MAF gnomAD (North-Western European, non-Finnish) | MAF DanMAC5 (Danish reference) | Frequency            | P-value                    |
| rs17633662 | C        | T           | 10  | 122322160  | 0.257                    | 0.278                                            | 0.261                          | 0.02                 | 0.205                      |
| rs76443833 | G        | A           | 10  | 122323269  | 0.249                    | 0.175 NA                                         |                                | 0.031                | 0.352                      |
| rs12776883 | C        | T           | 10  | 122340062  | 0.271                    | 0.298                                            | 0.256                          | 0.006                | 0.094                      |
| rs17634034 | T        | G           | 10  | 122345048  | 0.275                    | 0.301                                            | 0.275                          | 0.004                | 0.094                      |
| rs11597267 | C        | T           | 10  | 122345647  | 0.249 NA                 | NA                                               |                                | 0.009                | 0.088                      |
| rs34954484 | G        | C           | 10  | 122347597  | 0.273                    | 0.303                                            | 0.276                          | 0.017                | 0.151                      |
| rs71543507 | A        | G           | 7   | 152619890  | 0.079                    | 0.094                                            | 0.093                          | 0.045                | 0.405                      |

**Supplementary Table 3.** Summary of MAGMA gene-level association analysis as computed by FUMA. Top 200 associations are shown, sorted by ascending p-value. A total of 19067 protein coding genes were included in the analysis. Genome wide significance was defined at  $P = 0.05/19067 = 2.622e-6$ . This analysis was performed on all sequence variants and their associations with social trust in the meta-analysis.

| GENE                   | CHR | START     | STOP      | NSNPS | NPARAM | N     | ZSTAT  | P        | SYMBOL          | P Bonferroni |
|------------------------|-----|-----------|-----------|-------|--------|-------|--------|----------|-----------------|--------------|
| <i>ENSG00000164220</i> | 5   | 75911307  | 75919259  | 28    | 9      | 39841 | 4.0724 | 2.33E-05 | <i>F2RL2</i>    | 4.55E-01     |
| <i>ENSG00000248485</i> | 1   | 161228517 | 161255240 | 96    | 14     | 39841 | 3.9776 | 3.48E-05 | <i>PCP4L1</i>   | 6.80E-01     |
| <i>ENSG00000145703</i> | 5   | 75699074  | 76003957  | 954   | 75     | 39841 | 3.7251 | 9.76E-05 | <i>IQGAP2</i>   | 1.00E+00     |
| <i>ENSG00000130479</i> | 19  | 17830051  | 17845325  | 56    | 8      | 39841 | 3.6227 | 0.000146 | <i>MAP1S</i>    | 1.00E+00     |
| <i>ENSG00000145022</i> | 3   | 49449639  | 49453908  | 7     | 3      | 39841 | 3.5033 | 0.00023  | <i>TCTA</i>     | 1.00E+00     |
| <i>ENSG00000164062</i> | 3   | 49711435  | 49721396  | 6     | 2      | 39841 | 3.462  | 0.000268 | <i>APEH</i>     | 1.00E+00     |
| <i>ENSG00000145029</i> | 3   | 49460379  | 49466759  | 7     | 4      | 39841 | 3.4383 | 0.000293 | <i>NICN1</i>    | 1.00E+00     |
| <i>ENSG00000233276</i> | 3   | 49394609  | 49396033  | 2     | 1      | 39841 | 3.4343 | 0.000297 | <i>GPX1</i>     | 1.00E+00     |
| <i>ENSG00000251655</i> | 12  | 11504757  | 11548500  | 135   | 17     | 39841 | 3.4011 | 0.000336 | <i>PRB1</i>     | 1.00E+00     |
| <i>ENSG00000138472</i> | 3   | 108626639 | 108672742 | 158   | 21     | 39841 | 3.321  | 0.000449 | <i>GUCA1C</i>   | 1.00E+00     |
| <i>ENSG00000069020</i> | 5   | 65892176  | 66465423  | 1281  | 77     | 39841 | 3.2996 | 0.000484 | <i>MAST4</i>    | 1.00E+00     |
| <i>ENSG00000213995</i> | 13  | 111267881 | 111292340 | 124   | 11     | 39841 | 3.2841 | 0.000512 | <i>CARKD</i>    | 1.00E+00     |
| <i>ENSG00000164061</i> | 3   | 49591922  | 49708978  | 152   | 15     | 39841 | 3.2375 | 0.000603 | <i>BSN</i>      | 1.00E+00     |
| <i>ENSG00000070190</i> | 4   | 100737990 | 100791311 | 179   | 24     | 39841 | 3.2296 | 0.00062  | <i>DAPP1</i>    | 1.00E+00     |
| <i>ENSG00000164076</i> | 3   | 49895421  | 49907655  | 16    | 4      | 39841 | 3.1885 | 0.000715 | <i>CAMKV</i>    | 1.00E+00     |
| <i>ENSG00000152404</i> | 11  | 107197071 | 107328572 | 450   | 27     | 39841 | 3.1794 | 0.000738 | <i>CWF19L2</i>  | 1.00E+00     |
| <i>ENSG00000025434</i> | 11  | 47269851  | 47290396  | 40    | 6      | 39841 | 3.1702 | 0.000762 | <i>NR1H3</i>    | 1.00E+00     |
| <i>ENSG00000149534</i> | 11  | 59855734  | 59863444  | 20    | 3      | 39841 | 3.1576 | 0.000795 | <i>MS4A2</i>    | 1.00E+00     |
| <i>ENSG00000105607</i> | 19  | 13001840  | 13025021  | 39    | 9      | 39841 | 3.1527 | 0.000809 | <i>GCDH</i>     | 1.00E+00     |
| <i>ENSG00000177706</i> | 7   | 192969    | 300711    | 318   | 38     | 39841 | 3.1389 | 0.000848 | <i>FAM20C</i>   | 1.00E+00     |
| <i>ENSG00000232434</i> | 9   | 139738867 | 139741797 | 1     | 1      | 39841 | 3.1376 | 0.000852 | <i>C9orf172</i> | 1.00E+00     |
| <i>ENSG00000187268</i> | X   | 13053737  | 13062801  | 7     | 2      | 39841 | 3.1263 | 0.000885 | <i>FAM9C</i>    | 1.00E+00     |
| <i>ENSG00000067560</i> | 3   | 49396578  | 49450431  | 93    | 10     | 39841 | 3.0969 | 0.000978 | <i>RHOA</i>     | 1.00E+00     |
| <i>ENSG00000080910</i> | 1   | 196788898 | 196928356 | 377   | 19     | 39841 | 3.0955 | 0.000982 | <i>CFHR2</i>    | 1.00E+00     |
| <i>ENSG00000120306</i> | 5   | 139554227 | 139661637 | 204   | 12     | 39841 | 3.0848 | 0.001019 | <i>CYSTM1</i>   | 1.00E+00     |
| <i>ENSG00000173402</i> | 3   | 49506146  | 49573048  | 102   | 12     | 39841 | 3.0701 | 0.00107  | <i>DAG1</i>     | 1.00E+00     |
| <i>ENSG00000143248</i> | 1   | 163080911 | 163291577 | 773   | 46     | 39841 | 3.0535 | 0.001131 | <i>RGS5</i>     | 1.00E+00     |

|                 |    |           |           |      |    |       |        |          |                |          |
|-----------------|----|-----------|-----------|------|----|-------|--------|----------|----------------|----------|
| ENSG00000173852 | 7  | 34968488  | 35077883  | 364  | 18 | 39841 | 3.0506 | 0.001142 | DPY19L1        | 1.00E+00 |
| ENSG00000076513 | 12 | 110436991 | 110477568 | 80   | 16 | 39841 | 3.0382 | 0.00119  | ANKRD13A       | 1.00E+00 |
| ENSG00000114349 | 3  | 50229045  | 50233949  | 3    | 1  | 39841 | 3.0265 | 0.001237 | GNAT1          | 1.00E+00 |
| ENSG00000126012 | X  | 53220503  | 53254604  | 22   | 1  | 39841 | 3.0241 | 0.001247 | KDM5C          | 1.00E+00 |
| ENSG00000167822 | 11 | 55904247  | 55905194  | 5    | 2  | 39841 | 3.0183 | 0.001271 | OR8J3          | 1.00E+00 |
| ENSG00000101282 | 20 | 939095    | 982907    | 163  | 23 | 39841 | 3.0111 | 0.001302 | RSPO4          | 1.00E+00 |
| ENSG00000258572 | 14 | 95982473  | 95984248  | 10   | 3  | 39841 | 3.0093 | 0.001309 | RP11-1070N10.3 | 1.00E+00 |
| ENSG00000110514 | 11 | 47290712  | 47351582  | 133  | 14 | 39841 | 2.9998 | 0.001351 | MADD           | 1.00E+00 |
| ENSG00000139437 | 12 | 110338069 | 110421646 | 174  | 20 | 39841 | 2.99   | 0.001395 | TCHP           | 1.00E+00 |
| ENSG00000139436 | 12 | 110367607 | 110434194 | 131  | 17 | 39841 | 2.989  | 0.0014   | GIT2           | 1.00E+00 |
| ENSG00000259224 | 17 | 7384721   | 7386383   | 5    | 1  | 39841 | 2.9691 | 0.001493 | SLC35G6        | 1.00E+00 |
| ENSG00000134575 | 11 | 47260853  | 47270457  | 24   | 5  | 39841 | 2.9656 | 0.00151  | ACP2           | 1.00E+00 |
| ENSG00000183763 | 3  | 49866034  | 49894007  | 36   | 5  | 39841 | 2.9577 | 0.00155  | TRAIIP         | 1.00E+00 |
| ENSG00000139329 | 12 | 91496406  | 91505608  | 38   | 6  | 39841 | 2.9557 | 0.00156  | LUM            | 1.00E+00 |
| ENSG00000131375 | 3  | 15247659  | 15294425  | 36   | 12 | 39841 | 2.9405 | 0.001638 | CAPN7          | 1.00E+00 |
| ENSG00000107518 | 10 | 116853124 | 117708503 | 1818 | 36 | 39841 | 2.9103 | 0.001806 | ATRNL1         | 1.00E+00 |
| ENSG00000134571 | 11 | 47352957  | 47374253  | 38   | 10 | 39841 | 2.8972 | 0.001882 | MYBPC3         | 1.00E+00 |
| ENSG00000113068 | 5  | 139624624 | 139682706 | 94   | 9  | 39841 | 2.8891 | 0.001932 | PFDN1          | 1.00E+00 |
| ENSG00000196440 | X  | 100673275 | 100788446 | 200  | 16 | 39841 | 2.8873 | 0.001943 | ARMCX4         | 1.00E+00 |
| ENSG00000086548 | 19 | 42254885  | 42276113  | 41   | 8  | 39841 | 2.8851 | 0.001957 | CEACAM6        | 1.00E+00 |
| ENSG00000155970 | 8  | 16884747  | 16980153  | 280  | 24 | 39841 | 2.8824 | 0.001973 | MICU3          | 1.00E+00 |
| ENSG00000173531 | 3  | 49721380  | 49726934  | 8    | 3  | 39841 | 2.8807 | 0.001984 | MST1           | 1.00E+00 |
| ENSG00000171714 | 11 | 22214722  | 22304903  | 151  | 12 | 39841 | 2.8807 | 0.001984 | ANO5           | 1.00E+00 |
| ENSG00000170270 | 14 | 93669239  | 93673439  | 2    | 1  | 39841 | 2.8624 | 0.002102 | C14orf142      | 1.00E+00 |
| ENSG00000164077 | 3  | 49946302  | 49967606  | 22   | 8  | 39841 | 2.836  | 0.002284 | MON1A          | 1.00E+00 |
| ENSG00000179954 | 19 | 55999771  | 56030465  | 128  | 23 | 39841 | 2.833  | 0.002306 | SSC5D          | 1.00E+00 |
| ENSG00000235608 | 4  | 1396720   | 1400119   | 4    | 2  | 39841 | 2.8297 | 0.00233  | NKX1-1         | 1.00E+00 |
| ENSG00000101558 | 18 | 9913999   | 9960018   | 128  | 21 | 39841 | 2.8296 | 0.00233  | VAPA           | 1.00E+00 |
| ENSG00000164032 | 4  | 100869243 | 100871545 | 6    | 2  | 39841 | 2.8261 | 0.002356 | H2AFZ          | 1.00E+00 |
| ENSG00000007001 | 2  | 158733214 | 158992666 | 760  | 58 | 39841 | 2.8245 | 0.002368 | UPP2           | 1.00E+00 |
| ENSG00000116761 | 1  | 70876901  | 70905534  | 68   | 16 | 39841 | 2.8193 | 0.002406 | CTH            | 1.00E+00 |
| ENSG00000163704 | 3  | 9987226   | 9994078   | 11   | 6  | 39841 | 2.8182 | 0.002415 | PRRT3          | 1.00E+00 |
| ENSG00000204946 | 7  | 148959262 | 148994393 | 111  | 17 | 39841 | 2.8096 | 0.00248  | ZNF783         | 1.00E+00 |

|                        |    |           |           |     |    |       |        |          |                 |          |
|------------------------|----|-----------|-----------|-----|----|-------|--------|----------|-----------------|----------|
| <i>ENSG00000149182</i> | 11 | 47185848  | 47198676  | 22  | 7  | 39841 | 2.799  | 0.002563 | <i>ARFGAP2</i>  | 1.00E+00 |
| <i>ENSG00000177119</i> | 12 | 45609770  | 45834187  | 536 | 21 | 39841 | 2.7987 | 0.002565 | <i>ANO6</i>     | 1.00E+00 |
| <i>ENSG00000169241</i> | 1  | 155107820 | 155111329 | 3   | 2  | 39841 | 2.7942 | 0.002601 | <i>SLC50A1</i>  | 1.00E+00 |
| <i>ENSG00000155158</i> | 9  | 15163620  | 15307358  | 470 | 52 | 39841 | 2.787  | 0.00266  | <i>TTC39B</i>   | 1.00E+00 |
| <i>ENSG00000196159</i> | 4  | 126237554 | 126414087 | 460 | 37 | 39841 | 2.786  | 0.002668 | <i>FAT4</i>     | 1.00E+00 |
| <i>ENSG00000166800</i> | 11 | 18477371  | 18501147  | 67  | 16 | 39841 | 2.7769 | 0.002744 | <i>LDHAL6A</i>  | 1.00E+00 |
| <i>ENSG00000126822</i> | 14 | 65170820  | 65213610  | 89  | 12 | 39841 | 2.7645 | 0.00285  | <i>PLEKHG3</i>  | 1.00E+00 |
| <i>ENSG00000181222</i> | 17 | 7387685   | 7417933   | 109 | 8  | 39841 | 2.7593 | 0.002897 | <i>POLR2A</i>   | 1.00E+00 |
| <i>ENSG00000175906</i> | 17 | 41476327  | 41478505  | 4   | 2  | 39841 | 2.7538 | 0.002945 | <i>ARL4D</i>    | 1.00E+00 |
| <i>ENSG00000165912</i> | 11 | 47199076  | 47207994  | 19  | 5  | 39841 | 2.7533 | 0.00295  | <i>PACSIN3</i>  | 1.00E+00 |
| <i>ENSG00000203805</i> | 10 | 122216466 | 122349367 | 457 | 40 | 39841 | 2.743  | 0.003044 | <i>PPAPDC1A</i> | 1.00E+00 |
| <i>ENSG00000149573</i> | 11 | 118124118 | 118135251 | 30  | 2  | 39841 | 2.7277 | 0.003189 | <i>MPZL2</i>    | 1.00E+00 |
| <i>ENSG00000129167</i> | 11 | 18039111  | 18063973  | 39  | 5  | 39841 | 2.7233 | 0.003232 | <i>TPH1</i>     | 1.00E+00 |
| <i>ENSG00000214787</i> | 11 | 59968726  | 60010561  | 122 | 12 | 39841 | 2.7179 | 0.003285 | <i>MS4A4E</i>   | 1.00E+00 |
| <i>ENSG00000165757</i> | 10 | 30301729  | 30404423  | 204 | 32 | 39841 | 2.7142 | 0.003322 | <i>KIAA1462</i> | 1.00E+00 |
| <i>ENSG00000242419</i> | 5  | 140864741 | 140892546 | 58  | 13 | 39841 | 2.706  | 0.003405 | <i>PCDHGC4</i>  | 1.00E+00 |
| <i>ENSG00000170373</i> | 20 | 23728190  | 23731905  | 27  | 6  | 39841 | 2.7014 | 0.003452 | <i>CST1</i>     | 1.00E+00 |
| <i>ENSG00000206053</i> | 16 | 1728257   | 1752281   | 30  | 5  | 39841 | 2.6965 | 0.003504 | <i>HN1L</i>     | 1.00E+00 |
| <i>ENSG00000185271</i> | 14 | 20896970  | 20903801  | 25  | 6  | 39841 | 2.6913 | 0.003559 | <i>KLHL33</i>   | 1.00E+00 |
| <i>ENSG00000176095</i> | 3  | 49761727  | 49823975  | 94  | 10 | 39841 | 2.6906 | 0.003566 | <i>IP6K1</i>    | 1.00E+00 |
| <i>ENSG00000116212</i> | 1  | 54411750  | 54433841  | 30  | 8  | 39841 | 2.6891 | 0.003583 | <i>LRRC42</i>   | 1.00E+00 |
| <i>ENSG00000149133</i> | 11 | 55761157  | 55762101  | 7   | 3  | 39841 | 2.689  | 0.003584 | <i>OR5F1</i>    | 1.00E+00 |
| <i>ENSG00000138622</i> | 15 | 73612200  | 73661605  | 122 | 23 | 39841 | 2.686  | 0.003616 | <i>HCN4</i>     | 1.00E+00 |
| <i>ENSG00000164532</i> | 7  | 35242042  | 35293758  | 129 | 8  | 39841 | 2.6803 | 0.003678 | <i>TBX20</i>    | 1.00E+00 |
| <i>ENSG00000242114</i> | 22 | 30821518  | 30825045  | 8   | 4  | 39841 | 2.6779 | 0.003704 | <i>MTFP1</i>    | 1.00E+00 |
| <i>ENSG00000182916</i> | X  | 102585124 | 102587254 | 2   | 1  | 39841 | 2.6737 | 0.003751 | <i>TCEAL7</i>   | 1.00E+00 |
| <i>ENSG00000181718</i> | 11 | 55999490  | 56000737  | 11  | 4  | 39841 | 2.6677 | 0.003818 | <i>OR5T2</i>    | 1.00E+00 |
| <i>ENSG00000161860</i> | 19 | 13009600  | 13030090  | 35  | 9  | 39841 | 2.6675 | 0.003821 | <i>SYCE2</i>    | 1.00E+00 |
| <i>ENSG00000179284</i> | 19 | 13075973  | 13085567  | 16  | 8  | 39841 | 2.6652 | 0.003847 | <i>DAND5</i>    | 1.00E+00 |
| <i>ENSG00000049768</i> | X  | 49106897  | 49121288  | 8   | 4  | 39841 | 2.664  | 0.003861 | <i>FOXP3</i>    | 1.00E+00 |
| <i>ENSG00000174282</i> | 17 | 7362685   | 7387582   | 58  | 9  | 39841 | 2.6623 | 0.003881 | <i>ZBTB4</i>    | 1.00E+00 |
| <i>ENSG00000164500</i> | 7  | 50135632  | 50199426  | 211 | 14 | 39841 | 2.6607 | 0.003899 | <i>C7orf72</i>  | 1.00E+00 |
| <i>ENSG00000176540</i> | 11 | 48387037  | 48388017  | 5   | 2  | 39841 | 2.6534 | 0.003984 | <i>OR4C5</i>    | 1.00E+00 |

|                 |    |           |           |     |    |       |        |          |            |          |
|-----------------|----|-----------|-----------|-----|----|-------|--------|----------|------------|----------|
| ENSG00000129194 | 17 | 7491496   | 7493488   | 4   | 2  | 39841 | 2.6532 | 0.003987 | SOX15      | 1.00E+00 |
| ENSG00000053747 | 18 | 21269407  | 21535030  | 415 | 19 | 39841 | 2.6437 | 0.0041   | LAMA3      | 1.00E+00 |
| ENSG00000073861 | 17 | 45810610  | 45823485  | 41  | 10 | 39841 | 2.6417 | 0.004124 | TBX21      | 1.00E+00 |
| ENSG00000109270 | 4  | 100799493 | 100815647 | 25  | 7  | 39841 | 2.638  | 0.00417  | LAMTOR3    | 1.00E+00 |
| ENSG00000185684 | 12 | 132568828 | 132613029 | 96  | 9  | 39841 | 2.6332 | 0.004229 | EP400NL    | 1.00E+00 |
| ENSG00000164031 | 4  | 100817405 | 100867883 | 87  | 15 | 39841 | 2.6327 | 0.004235 | DNAJB14    | 1.00E+00 |
| ENSG00000181761 | 11 | 55889849  | 55890787  | 13  | 3  | 39841 | 2.6315 | 0.00425  | OR8H3      | 1.00E+00 |
| ENSG00000240764 | 5  | 140868808 | 140892546 | 54  | 12 | 39841 | 2.6293 | 0.004278 | PCDHGC5    | 1.00E+00 |
| ENSG00000248099 | 19 | 17927321  | 17932383  | 7   | 2  | 39841 | 2.6291 | 0.00428  | INSL3      | 1.00E+00 |
| ENSG00000174456 | 12 | 110465872 | 110511491 | 110 | 19 | 39841 | 2.6273 | 0.004304 | C12orf76   | 1.00E+00 |
| ENSG00000267901 | 14 | 71683031  | 71683462  | 1   | 1  | 39841 | 2.6213 | 0.00438  | AC004817.1 | 1.00E+00 |
| ENSG00000134389 | 1  | 196946667 | 196978804 | 56  | 10 | 39841 | 2.6201 | 0.004395 | CFHR5      | 1.00E+00 |
| ENSG00000090530 | 3  | 189674517 | 189840226 | 583 | 29 | 39841 | 2.6156 | 0.004454 | LEPREL1    | 1.00E+00 |
| ENSG00000131981 | 14 | 55590828  | 55612126  | 47  | 6  | 39841 | 2.6062 | 0.004577 | LGALS3     | 1.00E+00 |
| ENSG00000214215 | 12 | 93096619  | 93102325  | 9   | 4  | 39841 | 2.6042 | 0.004605 | C12orf74   | 1.00E+00 |
| ENSG00000130475 | 19 | 17858527  | 17899377  | 144 | 21 | 39841 | 2.6041 | 0.004606 | FCHO1      | 1.00E+00 |
| ENSG00000114850 | 3  | 156257929 | 156272973 | 52  | 7  | 39841 | 2.5934 | 0.004752 | SSR3       | 1.00E+00 |
| ENSG00000115590 | 2  | 102608306 | 102645006 | 122 | 9  | 39841 | 2.5926 | 0.004762 | IL1R2      | 1.00E+00 |
| ENSG00000177888 | 1  | 197122810 | 197169672 | 77  | 11 | 39841 | 2.5905 | 0.004792 | ZBTB41     | 1.00E+00 |
| ENSG00000213214 | 7  | 143883176 | 143991230 | 3   | 2  | 39841 | 2.5786 | 0.00496  | ARHGGEF35  | 1.00E+00 |
| ENSG00000172476 | X  | 102754678 | 102774417 | 11  | 5  | 39841 | 2.5723 | 0.005052 | RAB40A     | 1.00E+00 |
| ENSG00000102076 | X  | 153409698 | 153424507 | 3   | 1  | 39841 | 2.5705 | 0.005078 | OPN1LW     | 1.00E+00 |
| ENSG00000149179 | 11 | 46958240  | 47185936  | 308 | 20 | 39841 | 2.567  | 0.005129 | C11orf49   | 1.00E+00 |
| ENSG00000104219 | 8  | 17013538  | 17082308  | 197 | 33 | 39841 | 2.5616 | 0.00521  | ZDHHC2     | 1.00E+00 |
| ENSG00000176198 | 14 | 20710898  | 20711979  | 3   | 2  | 39841 | 2.5607 | 0.005223 | OR11H4     | 1.00E+00 |
| ENSG00000163001 | 2  | 55746740  | 55773015  | 84  | 19 | 39841 | 2.5542 | 0.005321 | CCDC104    | 1.00E+00 |
| ENSG00000153179 | 12 | 65004293  | 65091347  | 241 | 23 | 39841 | 2.5492 | 0.005399 | RASSF3     | 1.00E+00 |
| ENSG00000139433 | 12 | 110288748 | 110318293 | 76  | 12 | 39841 | 2.5459 | 0.005449 | GLTP       | 1.00E+00 |
| ENSG00000213921 | 19 | 40267235  | 40276775  | 17  | 6  | 39841 | 2.5434 | 0.005489 | LEUTX      | 1.00E+00 |
| ENSG00000149679 | 20 | 60963688  | 60982341  | 81  | 12 | 39841 | 2.5426 | 0.005501 | CABLES2    | 1.00E+00 |
| ENSG00000181767 | 11 | 55872519  | 55873457  | 8   | 2  | 39841 | 2.5392 | 0.005556 | OR8H2      | 1.00E+00 |
| ENSG00000106665 | 7  | 73703805  | 73820273  | 270 | 22 | 39841 | 2.5385 | 0.005566 | CLIP2      | 1.00E+00 |
| ENSG00000185758 | 4  | 184242917 | 184243579 | 2   | 1  | 39841 | 2.5384 | 0.005568 | CLDN24     | 1.00E+00 |



|                 |   |              |           |      |    |       |        |          |                      |          |
|-----------------|---|--------------|-----------|------|----|-------|--------|----------|----------------------|----------|
| ENSG00000147206 | X | 102330738    | 102348157 | 16   | 7  | 39841 | 2.534  | 0.005639 | <i>NXF3</i>          | 1.00E+00 |
| ENSG00000151834 |   | 4 46250444   | 46477247  | 483  | 30 | 39841 | 2.5339 | 0.00564  | <i>GABRA2</i>        | 1.00E+00 |
| ENSG00000186487 |   | 2 1792885    | 2335032   | 1514 | 87 | 39841 | 2.5338 | 0.005642 | <i>MYT1L</i>         | 1.00E+00 |
| ENSG00000116898 |   | 1 36921319   | 36930038  | 33   | 5  | 39841 | 2.5318 | 0.005674 | <i>MRPS15</i>        | 1.00E+00 |
| ENSG00000261732 |   | 16 1682260   | 1736716   | 96   | 9  | 39841 | 2.5301 | 0.005701 | <i>LA16c-431H6.6</i> | 1.00E+00 |
| ENSG00000177234 |   | 10 122357721 | 122359629 | 8    | 3  | 39841 | 2.5257 | 0.005773 | <i>C10orf85</i>      | 1.00E+00 |
| ENSG00000119457 |   | 9 115641200  | 115653193 | 32   | 10 | 39841 | 2.5147 | 0.005957 | <i>SLC46A2</i>       | 1.00E+00 |
| ENSG00000240184 |   | 5 140855580  | 140892542 | 80   | 16 | 39841 | 2.5111 | 0.006018 | <i>PCDHGC3</i>       | 1.00E+00 |
| ENSG00000188542 |   | 2 241499471  | 241503431 | 11   | 5  | 39841 | 2.5001 | 0.006208 | <i>DUSP28</i>        | 1.00E+00 |
| ENSG00000116885 |   | 1 36881428   | 36916086  | 143  | 7  | 39841 | 2.4954 | 0.006291 | <i>OSCP1</i>         | 1.00E+00 |
| ENSG00000174957 |   | 11 55944094  | 55945032  | 1    | 1  | 39841 | 2.4944 | 0.006308 | <i>OR5J2</i>         | 1.00E+00 |
| ENSG00000134905 |   | 13 111293759 | 111365950 | 285  | 18 | 39841 | 2.4879 | 0.006425 | <i>CARS2</i>         | 1.00E+00 |
| ENSG00000163945 |   | 4 1341054    | 1381837   | 142  | 17 | 39841 | 2.4839 | 0.006498 | <i>UVSSA</i>         | 1.00E+00 |
| ENSG00000087258 |   | 16 56225302  | 56391356  | 418  | 47 | 39841 | 2.4833 | 0.006508 | <i>GNAO1</i>         | 1.00E+00 |
| ENSG00000066279 |   | 1 197053258  | 197115824 | 90   | 8  | 39841 | 2.4814 | 0.006544 | <i>ASPM</i>          | 1.00E+00 |
| ENSG00000129255 |   | 17 7486847   | 7496107   | 12   | 6  | 39841 | 2.4807 | 0.006556 | <i>MPDU1</i>         | 1.00E+00 |
| ENSG00000134365 |   | 1 196819371  | 196888102 | 180  | 17 | 39841 | 2.4767 | 0.00663  | <i>CFHR4</i>         | 1.00E+00 |
| ENSG00000124657 |   | 6 27925019   | 27925960  | 3    | 1  | 39841 | 2.4766 | 0.006632 | <i>OR2B6</i>         | 1.00E+00 |
| ENSG00000168394 |   | 6 32812986   | 32821755  | 82   | 9  | 39841 | 2.4749 | 0.006663 | <i>TAP1</i>          | 1.00E+00 |
| ENSG00000198791 |   | 8 17086737   | 17104387  | 44   | 9  | 39841 | 2.4694 | 0.006767 | <i>CNOT7</i>         | 1.00E+00 |
| ENSG00000183960 |   | 3 19189946   | 19577138  | 516  | 50 | 39841 | 2.4689 | 0.006776 | <i>KCNH8</i>         | 1.00E+00 |
| ENSG00000100055 |   | 22 37678068  | 37711382  | 86   | 13 | 39841 | 2.4639 | 0.006871 | <i>CYTH4</i>         | 1.00E+00 |
| ENSG00000106603 |   | 7 43648055   | 43769316  | 360  | 15 | 39841 | 2.4592 | 0.006962 | <i>COA1</i>          | 1.00E+00 |
| ENSG00000172487 |   | 11 56127691  | 56128764  | 8    | 4  | 39841 | 2.4581 | 0.006984 | <i>OR8J1</i>         | 1.00E+00 |
| ENSG00000172037 |   | 3 49158547   | 49170551  | 10   | 6  | 39841 | 2.4579 | 0.006987 | <i>LAMB2</i>         | 1.00E+00 |
| ENSG00000183908 |   | 11 56949221  | 56959191  | 27   | 7  | 39841 | 2.453  | 0.007083 | <i>LRRC55</i>        | 1.00E+00 |
| ENSG00000182179 |   | 3 49842640   | 49851379  | 7    | 2  | 39841 | 2.4508 | 0.007128 | <i>UBA7</i>          | 1.00E+00 |
| ENSG00000003756 |   | 3 50126341   | 50156454  | 24   | 6  | 39841 | 2.4502 | 0.007139 | <i>RBM5</i>          | 1.00E+00 |
| ENSG00000174007 |   | 3 196433148  | 196439164 | 29   | 5  | 39841 | 2.4496 | 0.00715  | <i>CEP19</i>         | 1.00E+00 |
| ENSG00000170175 |   | 17 7348380   | 7361026   | 32   | 6  | 39841 | 2.4469 | 0.007205 | <i>CHRNA1</i>        | 1.00E+00 |
| ENSG00000254585 |   | 15 23888691  | 23891175  | 2    | 1  | 39841 | 2.4464 | 0.007215 | <i>MAGEL2</i>        | 1.00E+00 |
| ENSG00000171408 |   | 6 136172834  | 136516712 | 587  | 56 | 39841 | 2.4404 | 0.007335 | <i>PDE7B</i>         | 1.00E+00 |
| ENSG00000188051 |   | 19 17546318  | 17559376  | 34   | 8  | 39841 | 2.4357 | 0.007433 | <i>TMEM221</i>       | 1.00E+00 |

|                        |    |           |           |     |    |       |        |          |                   |          |
|------------------------|----|-----------|-----------|-----|----|-------|--------|----------|-------------------|----------|
| <i>ENSG0000010319</i>  | 3  | 52467069  | 52479101  | 11  | 6  | 39841 | 2.4344 | 0.007458 | <i>SEMA3G</i>     | 1.00E+00 |
| <i>ENSG00000104064</i> | 15 | 50569389  | 50647605  | 180 | 11 | 39841 | 2.4305 | 0.007539 | <i>GABPB1</i>     | 1.00E+00 |
| <i>ENSG00000105875</i> | 7  | 134868590 | 134896316 | 81  | 5  | 39841 | 2.4298 | 0.007554 | <i>WDR91</i>      | 1.00E+00 |
| <i>ENSG00000039987</i> | 19 | 12862516  | 12869272  | 6   | 4  | 39841 | 2.4293 | 0.007564 | <i>BEST2</i>      | 1.00E+00 |
| <i>ENSG00000182187</i> | 2  | 209007297 | 209010892 | 15  | 3  | 39841 | 2.4275 | 0.007602 | <i>CRYGB</i>      | 1.00E+00 |
| <i>ENSG00000108771</i> | 17 | 40253422  | 40264751  | 31  | 5  | 39841 | 2.4264 | 0.007626 | <i>DHX58</i>      | 1.00E+00 |
| <i>ENSG00000144227</i> | 2  | 139428342 | 139537918 | 316 | 39 | 39841 | 2.4232 | 0.007693 | <i>NXPH2</i>      | 1.00E+00 |
| <i>ENSG00000206561</i> | 3  | 15491640  | 15563258  | 219 | 24 | 39841 | 2.4227 | 0.007703 | <i>COLQ</i>       | 1.00E+00 |
| <i>ENSG00000180998</i> | 14 | 53019866  | 53104431  | 189 | 23 | 39841 | 2.4223 | 0.007712 | <i>GPR137C</i>    | 1.00E+00 |
| <i>ENSG00000142623</i> | 1  | 17531621  | 17572500  | 129 | 35 | 39841 | 2.4178 | 0.007808 | <i>PADI1</i>      | 1.00E+00 |
| <i>ENSG00000171858</i> | 20 | 60962172  | 60963576  | 4   | 2  | 39841 | 2.4172 | 0.007821 | <i>RPS21</i>      | 1.00E+00 |
| <i>ENSG00000162746</i> | 1  | 161691353 | 161697933 | 32  | 9  | 39841 | 2.414  | 0.007889 | <i>FCRLB</i>      | 1.00E+00 |
| <i>ENSG00000186088</i> | 7  | 76940068  | 77045717  | 319 | 24 | 39841 | 2.414  | 0.00789  | <i>GSAP</i>       | 1.00E+00 |
| <i>ENSG00000205821</i> | 17 | 2310279   | 2318731   | 32  | 6  | 39841 | 2.4132 | 0.007906 | <i>AC006435.1</i> | 1.00E+00 |
| <i>ENSG00000154065</i> | 18 | 21178890  | 21242849  | 92  | 22 | 39841 | 2.4092 | 0.007994 | <i>ANKRD29</i>    | 1.00E+00 |
| <i>ENSG00000204388</i> | 6  | 31795512  | 31798031  | 3   | 2  | 39841 | 2.4088 | 0.008002 | <i>HSPA1B</i>     | 1.00E+00 |
| <i>ENSG00000164068</i> | 3  | 49726932  | 49758962  | 49  | 8  | 39841 | 2.4071 | 0.00804  | <i>RNF123</i>     | 1.00E+00 |
| <i>ENSG00000143819</i> | 1  | 225997794 | 226033260 | 117 | 31 | 39841 | 2.4071 | 0.00804  | <i>EPHX1</i>      | 1.00E+00 |
| <i>ENSG00000164543</i> | 7  | 43622357  | 43666385  | 134 | 11 | 39841 | 2.4032 | 0.008127 | <i>STK17A</i>     | 1.00E+00 |
| <i>ENSG00000137880</i> | 15 | 41056218  | 41059906  | 2   | 1  | 39841 | 2.3986 | 0.00823  | <i>GCHFR</i>      | 1.00E+00 |
| <i>ENSG00000259207</i> | 17 | 45331212  | 45421658  | 280 | 25 | 39841 | 2.3961 | 0.008286 | <i>ITGB3</i>      | 1.00E+00 |
| <i>ENSG00000007545</i> | 16 | 1662326   | 1727909   | 117 | 11 | 39841 | 2.3908 | 0.008405 | <i>CRAMP1L</i>    | 1.00E+00 |
| <i>ENSG00000147576</i> | 8  | 67342420  | 67383836  | 126 | 17 | 39841 | 2.388  | 0.008471 | <i>ADHFE1</i>     | 1.00E+00 |
| <i>ENSG00000143398</i> | 1  | 151170425 | 151222012 | 81  | 11 | 39841 | 2.384  | 0.008563 | <i>PIP5K1A</i>    | 1.00E+00 |
| <i>ENSG00000135213</i> | 7  | 75046066  | 75115548  | 156 | 22 | 39841 | 2.3838 | 0.008568 | <i>POM121C</i>    | 1.00E+00 |
| <i>ENSG00000250799</i> | 19 | 36290890  | 36304201  | 18  | 8  | 39841 | 2.3827 | 0.008594 | <i>PRODH2</i>     | 1.00E+00 |
| <i>ENSG00000196408</i> | 16 | 2028918   | 2034193   | 30  | 6  | 39841 | 2.3824 | 0.0086   | <i>NOXO1</i>      | 1.00E+00 |
| <i>ENSG00000056291</i> | 4  | 72897521  | 73013784  | 304 | 13 | 39841 | 2.3806 | 0.008642 | <i>NPFFR2</i>     | 1.00E+00 |
| <i>ENSG00000268674</i> | 1  | 16865561  | 16866070  | 1   | 1  | 39841 | 2.3802 | 0.008652 | <i>FAM231B</i>    | 1.00E+00 |
| <i>ENSG00000180425</i> | 11 | 114262165 | 114271139 | 20  | 5  | 39841 | 2.3801 | 0.008654 | <i>C11orf71</i>   | 1.00E+00 |
| <i>ENSG00000174970</i> | 11 | 55734975  | 55735990  | 12  | 1  | 39841 | 2.379  | 0.008681 | <i>OR10AG1</i>    | 1.00E+00 |
| <i>ENSG00000109118</i> | 17 | 27232268  | 27278789  | 47  | 11 | 39841 | 2.3763 | 0.008745 | <i>PHF12</i>      | 1.00E+00 |
| <i>ENSG00000130363</i> | 6  | 159393903 | 159421219 | 167 | 7  | 39841 | 2.376  | 0.00875  | <i>RSPH3</i>      | 1.00E+00 |

|                        |    |           |           |     |    |       |        |          |                |          |
|------------------------|----|-----------|-----------|-----|----|-------|--------|----------|----------------|----------|
| <i>ENSG00000134574</i> | 11 | 47236493  | 47260767  | 52  | 8  | 39841 | 2.3757 | 0.008757 | <i>DDB2</i>    | 1.00E+00 |
| <i>ENSG00000259753</i> | 17 | 45331263  | 45421658  | 279 | 24 | 39841 | 2.3755 | 0.008763 | <i>ITGB3</i>   | 1.00E+00 |
| <i>ENSG00000101199</i> | 20 | 61904137  | 61921142  | 38  | 4  | 39841 | 2.3705 | 0.008883 | <i>ARFGAP1</i> | 1.00E+00 |
| <i>ENSG00000198877</i> | 11 | 55540914  | 55541858  | 2   | 1  | 39841 | 2.3665 | 0.008979 | <i>OR5D13</i>  | 1.00E+00 |
| <i>ENSG00000139508</i> | 13 | 29274201  | 29293107  | 28  | 5  | 39841 | 2.3662 | 0.008985 | <i>SLC46A3</i> | 1.00E+00 |
| <i>ENSG00000164078</i> | 3  | 49924435  | 49941299  | 14  | 4  | 39841 | 2.365  | 0.009015 | <i>MST1R</i>   | 1.00E+00 |
| <i>ENSG00000223510</i> | 17 | 14138990  | 14140179  | 1   | 1  | 39841 | 2.3603 | 0.00913  | <i>CDRT15</i>  | 1.00E+00 |
| <i>ENSG00000113108</i> | 5  | 139937853 | 139973337 | 37  | 12 | 39841 | 2.3585 | 0.009175 | <i>APBB3</i>   | 1.00E+00 |

**Supplementary Table 4.** Summary of MAGMA gene set-level association analysis as computed by FUMA. In this analysis, all sequence variants were considered. The top 200 associations are shown, sorted by ascending p-value. Variant-to-gene mapping was performed based on all the available eQTL maps (EyeGEx, eQTL catalogue, PsychENCODE, van der Wijst et al. scRNA eQTLs, DICE, eQTLGen, Blood eQTLs, MuTHER, xQTLServer, CommonMind Consortium, BRAINEAC and GTEx v8), Hi-C chromatin interaction data of 23 tissue and cell types from GEO:GSE87112, along with PsychENCODE and FANTOM datasets. A total of 10678 gene sets (curated gene sets: 4761, GO terms: 5917) from MsigDB v6.2 were included in the analysis. Genome wide significance was defined at  $P = 0.05/10678 = 4.68e-6$ .

| FULL_NAME                                                                    | NGENES | BETA     | BETA_STD SE | P        | P Bonferroni |             |
|------------------------------------------------------------------------------|--------|----------|-------------|----------|--------------|-------------|
| GO_mf:go_ap_1_adaptor_complex_binding                                        | 5      | 1.2614   | 0.020174    | 0.2669   | 1.15E-06     | 0.017871998 |
| GO_bp:go_positive_regulation_of_protein_kinase_b_signaling                   | 165    | 0.26723  | 0.024452    | 0.063153 | 1.17E-05     | 0.180675162 |
| GO_bp:go_golgi_to_endosome_transport                                         | 17     | 0.76003  | 0.022407    | 0.19223  | 3.86E-05     | 0.59796876  |
| GO_mf:go_g_protein_coupled_receptor_activity                                 | 754    | 0.13742  | 0.026467    | 0.03625  | 7.53E-05     | 1           |
| GO_bp:go_response_to_platelet_derived_growth_factor                          | 21     | 0.65556  | 0.021479    | 0.17431  | 8.49E-05     | 1           |
| GO_bp:go_arp2_3_complex_mediated_actin_nucleation                            | 32     | 0.43752  | 0.01769     | 0.12156  | 0.00016      | 1           |
| GO_mf:go_udp_xylosyltransferase_activity                                     | 11     | 0.82687  | 0.019613    | 0.23748  | 0.00025      | 1           |
| GO_bp:go_purine_nucleoside_diphosphate_biosynthetic_process                  | 6      | 1.0896   | 0.01909     | 0.31583  | 0.000281     | 1           |
| GO_bp:go_positive_regulation_of_ossification                                 | 78     | 0.31687  | 0.019979    | 0.096345 | 0.000504     | 1           |
| GO_mf:go_transmembrane_signaling_receptor_activity                           | 1156   | 0.092619 | 0.021851    | 0.028254 | 0.000524     | 1           |
| GO_mf:go_calcium_dependent_cysteine_type_endopeptidase_activity              | 17     | 0.67579  | 0.019924    | 0.20886  | 0.000608     | 1           |
| GO_bp:go_g_protein_coupled_receptor_signaling_pathway                        | 1236   | 0.087033 | 0.021185    | 0.026913 | 0.000612     | 1           |
| Curated_gene_sets:monnier_postradiation_tumor_escape_up                      | 391    | 0.12604  | 0.017649    | 0.039008 | 0.000618     | 1           |
| GO_mf:go_ige_binding                                                         | 5      | 1.0216   | 0.01634     | 0.31836  | 0.000667     | 1           |
| GO_mf:go_bmp_receptor_activity                                               | 7      | 1.2119   | 0.022934    | 0.37977  | 0.00071      | 1           |
| Curated_gene_sets:reactome_constitutive_signaling_by_aberrant_pi3k_in_cancer | 76     | 0.31842  | 0.019819    | 0.1001   | 0.000735     | 1           |
| GO_bp:go_mammary_gland_development                                           | 138    | 0.22544  | 0.018878    | 0.07119  | 0.000772     | 1           |
| Curated_gene_sets:camps_colon_cancer_copy_number_dn                          | 56     | 0.37265  | 0.01992     | 0.11784  | 0.000784     | 1           |
| Curated_gene_sets:changolkar_h2afy_targets_dn                                | 41     | 0.39441  | 0.018047    | 0.12488  | 0.000795     | 1           |
| GO_mf:go_protein_xylosyltransferase_activity                                 | 5      | 1.0625   | 0.016994    | 0.33655  | 0.000798     | 1           |
| GO_bp:go_regulation_of_neuromuscular_junction_development                    | 11     | 0.74579  | 0.01769     | 0.23773  | 0.000854     | 1           |
| GO_bp:go_iron_coordination_entity_transport                                  | 13     | 0.64049  | 0.016515    | 0.20533  | 0.000908     | 1           |
| GO_bp:go_gland_development                                                   | 432    | 0.12576  | 0.018491    | 0.040391 | 0.000926     | 1           |

|                                                                                                        |      |          |          |          |          |   |
|--------------------------------------------------------------------------------------------------------|------|----------|----------|----------|----------|---|
| Curated_gene_sets:chow_rassf1_targets_up                                                               | 26   | 0.45582  | 0.016616 | 0.14691  | 0.00096  | 1 |
| Curated_gene_sets:shiraishi_plzf_targets_dn                                                            | 9    | 0.76805  | 0.016479 | 0.24782  | 0.000972 | 1 |
| GO_bp:go_positive_regulation_of_bone_development                                                       | 9    | 0.76521  | 0.016418 | 0.24975  | 0.001094 | 1 |
| GO_bp:go_regulation_of_arp2_3_complex_mediated_actin_nucleation                                        | 16   | 0.47653  | 0.01363  | 0.15553  | 0.001094 | 1 |
| GO_bp:go_heme_transport                                                                                | 9    | 0.73489  | 0.015768 | 0.23987  | 0.001095 | 1 |
| GO_bp:go_venous_blood_vessel_morphogenesis                                                             | 9    | 0.93615  | 0.020086 | 0.30574  | 0.001101 | 1 |
| Curated_gene_sets:mcbryan_pubertal_breast_3_4wk_dn                                                     | 35   | 0.42907  | 0.018143 | 0.1402   | 0.001107 | 1 |
| GO_bp:go_oxalate_transport                                                                             | 11   | 0.60376  | 0.014321 | 0.19752  | 0.00112  | 1 |
| GO_mf:go_photoreceptor_activity                                                                        | 14   | 0.66157  | 0.017702 | 0.21694  | 0.001148 | 1 |
| GO_bp:go_actin_nucleation                                                                              | 48   | 0.3204   | 0.01586  | 0.10517  | 0.001159 | 1 |
| Curated_gene_sets:tuomisto_tumor_suppression_by_col13a1_up                                             | 18   | 0.67401  | 0.020447 | 0.2225   | 0.001228 | 1 |
| GO_bp:go_venous_blood_vessel_development                                                               | 15   | 0.74044  | 0.020507 | 0.24489  | 0.001251 | 1 |
| GO_bp:go_adp_biosynthetic_process                                                                      | 5    | 1.0817   | 0.017301 | 0.35821  | 0.001266 | 1 |
| Curated_gene_sets:reactome_orexin_and_neuropeptides_ff_and_qrfp_bind_to_t<br>heir_respective_receptors | 7    | 1.1297   | 0.021378 | 0.37432  | 0.001274 | 1 |
| GO_mf:go_heme_transporter_activity                                                                     | 7    | 0.79307  | 0.015007 | 0.26382  | 0.001325 | 1 |
| GO_bp:go_nucleoside_diphosphate_biosynthetic_process                                                   | 9    | 0.80538  | 0.01728  | 0.27014  | 0.001437 | 1 |
| Curated_gene_sets:kegg_abc_transporters                                                                | 45   | 0.3684   | 0.017659 | 0.12361  | 0.001442 | 1 |
| GO_mf:go_molecular_transducer_activity                                                                 | 1420 | 0.074397 | 0.019313 | 0.025064 | 0.001499 | 1 |
| GO_bp:go_organism_emergence_from_protective_structure                                                  | 27   | 0.44312  | 0.01646  | 0.1506   | 0.001631 | 1 |
| Curated_gene_sets:eppert_lsc_r                                                                         | 39   | 0.38518  | 0.017191 | 0.13181  | 0.001739 | 1 |
| GO_bp:go_positive_regulation_of_osteoclast_development                                                 | 5    | 0.91488  | 0.014633 | 0.31541  | 0.001865 | 1 |
| GO_mf:go_vitamin_binding                                                                               | 134  | 0.20046  | 0.016543 | 0.069275 | 0.001906 | 1 |
| GO_bp:go_negative_regulation_of_vascular_permeability                                                  | 11   | 0.66748  | 0.015832 | 0.2314   | 0.001962 | 1 |
| GO_bp:go_negative_regulation_of_epinephrine_secretion                                                  | 5    | 1.0722   | 0.017148 | 0.37188  | 0.001972 | 1 |
| GO_bp:go_actin_polymerization_dependent_cell_motility                                                  | 6    | 1.016    | 0.0178   | 0.35375  | 0.002042 | 1 |
| Curated_gene_sets:villanueva_liver_cancer_krt19_dn                                                     | 67   | 0.2668   | 0.015595 | 0.09292  | 0.002047 | 1 |
| Curated_gene_sets:reactome_rna_polymerase_iii_transcription_initiation_from_t<br>ype_3_promoter        | 27   | 0.41591  | 0.015449 | 0.14486  | 0.002048 | 1 |
| GO_bp:go_regulation_of_gonadotropin_secretion                                                          | 11   | 0.7021   | 0.016653 | 0.24517  | 0.002096 | 1 |
| GO_bp:go_regulation_of_luteinizing_hormone_secretion                                                   | 7    | 0.83592  | 0.015818 | 0.29204  | 0.002105 | 1 |
| GO_mf:go_protein_heterodimerization_activity                                                           | 467  | 0.10909  | 0.016661 | 0.038156 | 0.002128 | 1 |
| GO_bp:go_chaperone_mediated_autophagy                                                                  | 16   | 0.55092  | 0.015758 | 0.19387  | 0.002246 | 1 |

|                                                                                                              |     |         |          |          |          |   |
|--------------------------------------------------------------------------------------------------------------|-----|---------|----------|----------|----------|---|
| GO_bp:go_defense_response_to_gram_positive_bacterium                                                         | 79  | 0.24765 | 0.015715 | 0.087285 | 0.002278 | 1 |
| Curated_gene_sets:reactome_pi3k_events_in_erb2_signaling                                                     | 16  | 0.59257 | 0.016949 | 0.20977  | 0.002367 | 1 |
| GO_mf:go_oxidoreductase_activity_acting_on_paired_donors_with_incorporation_or_reduction_of_molecular_oxygen | 154 | 0.19532 | 0.017271 | 0.06918  | 0.002379 | 1 |
| Curated_gene_sets:shin_b_cell_lymphoma_cluster_3                                                             | 27  | 0.4433  | 0.016467 | 0.15752  | 0.002447 | 1 |
| GO_cc:go_apical_plasma_membrane                                                                              | 314 | 0.13035 | 0.01639  | 0.046573 | 0.002568 | 1 |
| GO_bp:go_amp_metabolic_process                                                                               | 8   | 0.75108 | 0.015194 | 0.26895  | 0.002616 | 1 |
| GO_mf:go_arachidonic_acid_monooxygenase_activity                                                             | 15  | 0.61341 | 0.016989 | 0.22004  | 0.002657 | 1 |
| Curated_gene_sets:berenjeno_transformed_by_rhoa_reversibly_up                                                | 7   | 0.77987 | 0.014758 | 0.27979  | 0.00266  | 1 |
| GO_bp:go_detection_of_external_biotic_stimulus                                                               | 18  | 0.56067 | 0.017009 | 0.20127  | 0.002674 | 1 |
| GO_bp:go_outflow_tract_septum_morphogenesis                                                                  | 27  | 0.51059 | 0.018966 | 0.18335  | 0.002681 | 1 |
| GO_mf:go_phosphatase_inhibitor_activity                                                                      | 41  | 0.36782 | 0.016831 | 0.13215  | 0.002693 | 1 |
| GO_bp:go_platelet_activation                                                                                 | 153 | 0.18342 | 0.016167 | 0.065906 | 0.002695 | 1 |
| GO_bp:go_regulation_of_cytolysis                                                                             | 17  | 0.61537 | 0.018143 | 0.22127  | 0.002712 | 1 |
| Curated_gene_sets:baker_hematopoiesis_stat5_targets                                                          | 6   | 0.99316 | 0.0174   | 0.35882  | 0.002824 | 1 |
| GO_mf:go_secondary_active_sulfate_transmembrane_transporter_activity                                         | 13  | 0.53288 | 0.01374  | 0.19266  | 0.002841 | 1 |
| GO_bp:go_epoxygenase_p450_pathway                                                                            | 19  | 0.53745 | 0.016751 | 0.19433  | 0.002844 | 1 |
| Curated_gene_sets:hu_angiogenesis_up                                                                         | 21  | 0.47432 | 0.015541 | 0.17176  | 0.002879 | 1 |
| GO_mf:go_ferrous_iron_binding                                                                                | 23  | 0.44596 | 0.015291 | 0.16159  | 0.002894 | 1 |
| GO_mf:go_iron_ion_binding                                                                                    | 144 | 0.19379 | 0.016574 | 0.070266 | 0.002911 | 1 |
| Curated_gene_sets:reactome_rna_polymerase_iii_transcription                                                  | 40  | 0.32211 | 0.014558 | 0.1168   | 0.002913 | 1 |
| Curated_gene_sets:reactome_grb2_events_in_erb2_signaling                                                     | 16  | 0.55467 | 0.015865 | 0.202    | 0.003021 | 1 |
| GO_mf:go_activin_binding                                                                                     | 14  | 0.70968 | 0.018989 | 0.25911  | 0.003085 | 1 |
| GO_bp:go_positive_regulation_of_osteoblast_differentiation                                                   | 55  | 0.30907 | 0.016374 | 0.11286  | 0.003088 | 1 |
| GO_bp:go_lamellipodium_morphogenesis                                                                         | 17  | 0.50996 | 0.015035 | 0.1863   | 0.0031   | 1 |
| GO_bp:go_positive_regulation_of_neutrophil_migration                                                         | 26  | 0.44527 | 0.016231 | 0.1629   | 0.003137 | 1 |
| GO_bp:go_gastrulation_with_mouth_forming_second                                                              | 27  | 0.4129  | 0.015337 | 0.15117  | 0.003156 | 1 |
| Curated_gene_sets:aung_gastric_cancer                                                                        | 53  | 0.29724 | 0.015459 | 0.10905  | 0.00321  | 1 |
| Curated_gene_sets:schaeffer_prostate_development_and_cancer_box4_up                                          | 11  | 0.69675 | 0.016526 | 0.25634  | 0.003286 | 1 |
| GO_cc:go_brush_border_membrane                                                                               | 51  | 0.30256 | 0.015437 | 0.11133  | 0.00329  | 1 |
| GO_bp:go_interferon_gamma_production                                                                         | 108 | 0.22388 | 0.016598 | 0.082477 | 0.003323 | 1 |
| GO_bp:go_gonadotropin_secretion                                                                              | 15  | 0.55166 | 0.015278 | 0.20354  | 0.003364 | 1 |
| GO_mf:go_ubiquitin_binding                                                                                   | 77  | 0.24462 | 0.015325 | 0.090536 | 0.00345  | 1 |

|                                                                                  |     |         |          |          |          |   |
|----------------------------------------------------------------------------------|-----|---------|----------|----------|----------|---|
| Curated_gene_sets:reactome_shc1_events_in_erb2_signaling                         | 22  | 0.46027 | 0.015435 | 0.1708   | 0.003525 | 1 |
| GO_mf:go_oxalate_transmembrane_transporter_activity                              | 10  | 0.56801 | 0.012846 | 0.21119  | 0.003581 | 1 |
| GO_mf:go_manganese_ion_binding                                                   | 61  | 0.27492 | 0.015336 | 0.10226  | 0.003592 | 1 |
| Curated_gene_sets:reactome_the_retinoid_cycle_in_cones_daylight_vision           | 6   | 1.0565  | 0.01851  | 0.3934   | 0.003624 | 1 |
| GO_bp:go_negative_regulation_of_hydrogen_peroxide_mediated_programmed_cell_death | 5   | 0.97655 | 0.015619 | 0.36579  | 0.0038   | 1 |
| GO_bp:go_positive_regulation_of_interferon_gamma_production                      | 64  | 0.28332 | 0.016187 | 0.10635  | 0.003866 | 1 |
| GO_bp:go_morphogenesis_of_an_epithelial_sheet                                    | 53  | 0.30374 | 0.015797 | 0.11403  | 0.003866 | 1 |
| GO_cc:go_intrinsic_component_of_mitochondrial_outer_membrane                     | 21  | 0.40962 | 0.013421 | 0.15401  | 0.003913 | 1 |
| GO_bp:go_ectodermal_placode_development                                          | 13  | 0.58849 | 0.015174 | 0.22144  | 0.00394  | 1 |
| GO_cc:go_host_intracellular_organelle                                            | 5   | 1.1099  | 0.017752 | 0.41781  | 0.003951 | 1 |
| GO_bp:go_smooth_muscle_cell_chemotaxis                                           | 8   | 0.69057 | 0.01397  | 0.25998  | 0.003954 | 1 |
| Curated_gene_sets:reactome_pi3k_akt_signaling_in_cancer                          | 103 | 0.22088 | 0.015994 | 0.083161 | 0.003956 | 1 |
| GO_cc:go_rna_polymerase_complex                                                  | 103 | 0.19409 | 0.014054 | 0.073292 | 0.00405  | 1 |
| GO_bp:go_immature_t_cell_proliferation_in_thymus                                 | 7   | 0.70255 | 0.013295 | 0.26555  | 0.00408  | 1 |
| GO_mf:go_neuropeptide_receptor_activity                                          | 47  | 0.34868 | 0.01708  | 0.13254  | 0.004263 | 1 |
| GO_bp:go_detection_of_biotic_stimulus                                            | 22  | 0.48101 | 0.01613  | 0.18292  | 0.004278 | 1 |
| GO_bp:go_positive_regulation_of_gonadotropin_secretion                           | 7   | 0.76623 | 0.0145   | 0.29167  | 0.004311 | 1 |
| Curated_gene_sets:wong_endometrium_cancer_dn                                     | 75  | 0.2629  | 0.016256 | 0.10037  | 0.004409 | 1 |
| GO_bp:go_pigmentation                                                            | 96  | 0.2195  | 0.015347 | 0.083936 | 0.004464 | 1 |
| Curated_gene_sets:shen_smarca2_targets_dn                                        | 289 | 0.12173 | 0.014694 | 0.046578 | 0.004485 | 1 |
| Curated_gene_sets:turjanski_mapk11_targets                                       | 5   | 0.8519  | 0.013625 | 0.32607  | 0.004496 | 1 |
| GO_bp:go_positive_regulation_of_digestive_system_process                         | 10  | 0.71518 | 0.016175 | 0.27469  | 0.004617 | 1 |
| GO_bp:go_cd4_positive_alpha_beta_t_cell_lineage_commitment                       | 17  | 0.56588 | 0.016683 | 0.21736  | 0.004619 | 1 |
| Curated_gene_sets:pid_alk1_pathway                                               | 25  | 0.44108 | 0.015767 | 0.16946  | 0.004627 | 1 |
| GO_cc:go centriole                                                               | 133 | 0.1784  | 0.014668 | 0.068561 | 0.004637 | 1 |
| GO_bp:go_follicle_stimulating_hormone_secretion                                  | 7   | 0.76596 | 0.014494 | 0.29473  | 0.00468  | 1 |
| GO_mf:go_oxo_acid_lyase_activity                                                 | 6   | 0.71697 | 0.012561 | 0.27591  | 0.004685 | 1 |
| GO_bp:go_regulation_of_protein_complex_stability                                 | 10  | 0.69635 | 0.015749 | 0.26808  | 0.004699 | 1 |
| GO_bp:go_aromatic_amino_acid_family_metabolic_process                            | 12  | 0.65137 | 0.016137 | 0.25096  | 0.004726 | 1 |
| GO_bp:go_thrombin_activated_receptor_signaling_pathway                           | 12  | 0.59435 | 0.014724 | 0.22936  | 0.004784 | 1 |
| GO_bp:go_amino_sugar_catabolic_process                                           | 8   | 0.84456 | 0.017085 | 0.32602  | 0.004796 | 1 |

|                                                                         |     |          |          |          |          |   |
|-------------------------------------------------------------------------|-----|----------|----------|----------|----------|---|
| GO_bp:go_positive_regulation_of_membrane_protein_ectodomain_proteolysis | 15  | 0.50573  | 0.014006 | 0.19561  | 0.004867 | 1 |
| GO_bp:go_negative_regulation_of_interleukin_2_biosynthetic_process      | 5   | 1.0296   | 0.016468 | 0.39908  | 0.004945 | 1 |
| GO_mf:go_n6_methyladenosine_containing_rna_binding                      | 7   | 0.68489  | 0.01296  | 0.26723  | 0.005194 | 1 |
| GO_bp:go_epinephrine_transport                                          | 8   | 0.79213  | 0.016024 | 0.31043  | 0.005364 | 1 |
| GO_bp:go_inflammatory_response                                          | 681 | 0.084512 | 0.015499 | 0.033133 | 0.00538  | 1 |
| GO_bp:go_endoplasmic_reticulum_tubular_network_organization             | 16  | 0.44536  | 0.012739 | 0.17467  | 0.005394 | 1 |
| GO_bp:go_negative_regulation_of_t_cell_cytokine_production              | 9   | 0.65768  | 0.014111 | 0.25826  | 0.005443 | 1 |
| Curated_gene_sets:iwanaga_e2f1_targets_induced_by_serum                 | 24  | 0.48391  | 0.016949 | 0.19027  | 0.005494 | 1 |
| GO_bp:go_negative_regulation_of_mesenchymal_cell_proliferation          | 8   | 0.86963  | 0.017592 | 0.34251  | 0.005563 | 1 |
| GO_cc:go_apical_part_of_cell                                            | 378 | 0.10778  | 0.014844 | 0.042469 | 0.005583 | 1 |
| GO_bp:go_wound_healing                                                  | 527 | 0.091869 | 0.014882 | 0.036209 | 0.005591 | 1 |
| GO_bp:go_midgut_development                                             | 13  | 0.6641   | 0.017123 | 0.26202  | 0.005634 | 1 |
| Curated_gene_sets:jazag_tgfb1_signaling_dn                              | 33  | 0.32768  | 0.013454 | 0.12941  | 0.005674 | 1 |
| GO_mf:go_odorant_binding                                                | 81  | 0.27898  | 0.017924 | 0.11024  | 0.005698 | 1 |
| GO_bp:go_rho_protein_signal_transduction                                | 201 | 0.14756  | 0.014888 | 0.058395 | 0.005757 | 1 |
| GO_bp:go_phototransduction                                              | 57  | 0.27294  | 0.01472  | 0.10818  | 0.005821 | 1 |
| GO_bp:go_branching_involved_in_blood_vessel_morphogenesis               | 29  | 0.39395  | 0.015165 | 0.15632  | 0.00587  | 1 |
| Curated_gene_sets:reactome_negative_regulation_of_the_pi3k_akt_network  | 111 | 0.20221  | 0.015197 | 0.080338 | 0.005923 | 1 |
| Curated_gene_sets:biocarta_alk_pathway                                  | 35  | 0.35423  | 0.014978 | 0.14086  | 0.005961 | 1 |
| Curated_gene_sets:reactome_met_activates_pi3k_akt_signaling             | 6   | 0.88176  | 0.015448 | 0.35072  | 0.005971 | 1 |
| GO_bp:go_cellular_response_to_lead_ion                                  | 5   | 0.97208  | 0.015547 | 0.38677  | 0.005984 | 1 |
| GO_bp:go_detection_of_other_organism                                    | 13  | 0.61147  | 0.015766 | 0.24396  | 0.006103 | 1 |
| Curated_gene_sets:wallace_prostate_cancer_race_dn                       | 82  | 0.21645  | 0.013992 | 0.086484 | 0.006165 | 1 |
| Curated_gene_sets:reactome_opsins                                       | 8   | 0.68283  | 0.013813 | 0.27441  | 0.006421 | 1 |
| GO_bp:go_positive_regulation_of_myoblast_proliferation                  | 8   | 0.72022  | 0.01457  | 0.28952  | 0.006435 | 1 |
| Curated_gene_sets:reactome_rna_polymerase_iii_transcription_termination | 22  | 0.42068  | 0.014107 | 0.16936  | 0.006501 | 1 |
| GO_bp:go_regulation_of_histone_deacetylation                            | 24  | 0.39127  | 0.013704 | 0.15781  | 0.006586 | 1 |
| GO_bp:go_exocrine_system_development                                    | 48  | 0.3178   | 0.015732 | 0.12818  | 0.006587 | 1 |
| GO_mf:go_mannosyl_oligosaccharide_mannosidase_activity                  | 9   | 0.59928  | 0.012858 | 0.24213  | 0.006666 | 1 |
| GO_bp:go_gland_morphogenesis                                            | 118 | 0.19883  | 0.015404 | 0.080455 | 0.006736 | 1 |
| GO_bp:go_icosanoid_metabolic_process                                    | 78  | 0.22886  | 0.01443  | 0.092852 | 0.00686  | 1 |
| GO_bp:go_alpha_beta_t_cell_lineage_commitment                           | 19  | 0.50734  | 0.015812 | 0.20605  | 0.006909 | 1 |



|                                                                                                                |     |          |          |          |          |   |
|----------------------------------------------------------------------------------------------------------------|-----|----------|----------|----------|----------|---|
| Curated_gene_sets:tomlins_metastasis_dn                                                                        | 20  | 0.4062   | 0.012989 | 0.16501  | 0.006919 | 1 |
| GO_bp:go_positive_regulation_of_respiratory_burst                                                              | 6   | 0.81848  | 0.01434  | 0.33253  | 0.006924 | 1 |
| GO_bp:go_regulation_of_receptor_recycling                                                                      | 23  | 0.37343  | 0.012804 | 0.15204  | 0.007027 | 1 |
| GO_bp:go_response_to_bacterial_lipoprotein                                                                     | 7   | 0.86256  | 0.016322 | 0.35123  | 0.007033 | 1 |
| Curated_gene_sets:ruan_response_to_tnf_up                                                                      | 12  | 0.602    | 0.014914 | 0.24654  | 0.007312 | 1 |
| Curated_gene_sets:lu_tumor_vasculature_dn                                                                      | 13  | 0.66871  | 0.017242 | 0.27391  | 0.007321 | 1 |
| GO_mf:go_rna_directed_dna_polymerase_activity                                                                  | 6   | 0.72913  | 0.012774 | 0.29876  | 0.007338 | 1 |
| GO_mf:go_telomerase_activity                                                                                   | 6   | 0.72913  | 0.012774 | 0.29876  | 0.007338 | 1 |
| GO_bp:go_outflow_tract_morphogenesis                                                                           | 75  | 0.25232  | 0.015602 | 0.10353  | 0.007405 | 1 |
| Curated_gene_sets:reactome_erb2_activates_ptk6_signaling                                                       | 13  | 0.52438  | 0.013521 | 0.21547  | 0.007478 | 1 |
| GO_bp:go_nls_bearing_protein_import_into_nucleus                                                               | 21  | 0.40965  | 0.013422 | 0.16848  | 0.007524 | 1 |
| GO_bp:go_negative_regulation_of_creb_transcription_factor_activity                                             | 5   | 0.94613  | 0.015132 | 0.39008  | 0.007649 | 1 |
| GO_bp:go_positive_regulation_of_cytolysis                                                                      | 11  | 0.6894   | 0.016352 | 0.28476  | 0.007744 | 1 |
| Curated_gene_sets:lee_bmp2_targets_up                                                                          | 745 | 0.073644 | 0.014103 | 0.030431 | 0.007764 | 1 |
| GO_cc:go_intrinsic_component_of_mitochondrial_membrane                                                         | 71  | 0.22064  | 0.013275 | 0.091339 | 0.00786  | 1 |
| Curated_gene_sets:finetti_breast_cancers_kinome_blue                                                           | 21  | 0.42087  | 0.01379  | 0.17423  | 0.007861 | 1 |
| GO_bp:go_lymphangiogenesis                                                                                     | 15  | 0.5588   | 0.015476 | 0.23173  | 0.00795  | 1 |
| GO_bp:go_regulation_of_epithelial_to_mesenchymal_transition_involved_in_endocardial_cushion_formation          | 5   | 1.0069   | 0.016104 | 0.41767  | 0.007967 | 1 |
| GO_bp:go_positive_regulation_of_epithelial_to_mesenchymal_transition_involved_in_endocardial_cushion_formation | 5   | 1.0069   | 0.016104 | 0.41767  | 0.007967 | 1 |
| Curated_gene_sets:reactome_fceri_mediated_caplus2_mobilization                                                 | 31  | 0.35743  | 0.014225 | 0.14828  | 0.007971 | 1 |
| GO_bp:go_modulation_by_symbiont_of_host_cellular_process                                                       | 27  | 0.36729  | 0.013643 | 0.1524   | 0.007982 | 1 |
| GO_bp:go_mammary_gland_formation                                                                               | 7   | 0.82855  | 0.015679 | 0.34532  | 0.008217 | 1 |
| Curated_gene_sets:stark_prefrontal_cortex_22q11_deletion_dn                                                    | 502 | 0.082635 | 0.013074 | 0.034458 | 0.008244 | 1 |
| GO_bp:go_myelin_assembly                                                                                       | 19  | 0.43077  | 0.013426 | 0.17969  | 0.008262 | 1 |
| GO_bp:go_regulation_of_cellular_response_to_hypoxia                                                            | 13  | 0.45665  | 0.011774 | 0.19049  | 0.008264 | 1 |
| Curated_gene_sets:landis_erb2_breast_tumors_324_up                                                             | 145 | 0.16499  | 0.014159 | 0.068831 | 0.008271 | 1 |
| GO_bp:go_regulation_of_actin_nucleation                                                                        | 28  | 0.30694  | 0.01161  | 0.12807  | 0.00828  | 1 |
| Curated_gene_sets:reactome_activation_of_the_phototransduction_cascade                                         | 11  | 0.53249  | 0.01263  | 0.22238  | 0.008327 | 1 |
| GO_bp:go_detection_of_stimulus                                                                                 | 598 | 0.097903 | 0.016863 | 0.040906 | 0.008352 | 1 |
| GO_bp:go_cellular_transition_metal_ion_homeostasis                                                             | 107 | 0.18236  | 0.013457 | 0.076262 | 0.008402 | 1 |
| GO_mf:go_c3hc4_type_ring_finger_domain_binding                                                                 | 6   | 0.7836   | 0.013729 | 0.32779  | 0.008416 | 1 |

|                                                                                       |     |         |          |          |          |   |
|---------------------------------------------------------------------------------------|-----|---------|----------|----------|----------|---|
| GO_bp:go_sensory_perception_of_smell                                                  | 371 | 0.14342 | 0.019573 | 0.059998 | 0.00842  | 1 |
| Curated_gene_sets:reactome_signaling_by_fgfr3_fusions_in_cancer                       | 10  | 0.55407 | 0.012531 | 0.23196  | 0.008461 | 1 |
| Curated_gene_sets:bandres_response_to_carmustine_mgmt_48hr_dn                         | 155 | 0.15138 | 0.013429 | 0.063464 | 0.008537 | 1 |
| GO_bp:go_protein_chromophore_linkage                                                  | 11  | 0.56235 | 0.013339 | 0.23678  | 0.00878  | 1 |
| Curated_gene_sets:reactome_pi3k_events_in_erb4_signaling                              | 10  | 0.69214 | 0.015653 | 0.29149  | 0.008792 | 1 |
| Curated_gene_sets:gentles_leukemic_stem_cell_dn                                       | 19  | 0.42084 | 0.013116 | 0.17769  | 0.008937 | 1 |
| Curated_gene_sets:sesto_response_to_uv_c3                                             | 21  | 0.41609 | 0.013633 | 0.17572  | 0.00895  | 1 |
| GO_bp:go_activin_receptor_signaling_pathway                                           | 39  | 0.33582 | 0.014987 | 0.1419   | 0.008983 | 1 |
| GO_bp:go_receptor_transactivation                                                     | 5   | 0.71173 | 0.011383 | 0.301    | 0.009033 | 1 |
| Curated_gene_sets:pid_erb4_network_pathway                                            | 15  | 0.53384 | 0.014785 | 0.22598  | 0.009085 | 1 |
| GO_bp:go_regulation_of_chaperone_mediated_autophagy                                   | 8   | 0.54608 | 0.011047 | 0.23134  | 0.009129 | 1 |
| Curated_gene_sets:reactome_olfactory_signaling_pathway                                | 355 | 0.14347 | 0.019161 | 0.060833 | 0.009182 | 1 |
| GO_mf:go_mediator_complex_binding                                                     | 5   | 0.77573 | 0.012407 | 0.32899  | 0.009195 | 1 |
| GO_bp:go_oxidative_dna_demethylation                                                  | 5   | 0.75048 | 0.012003 | 0.31833  | 0.009203 | 1 |
| GO_bp:go_positive_regulation_of_cytokine_production_involved_in_inflammatory_response | 15  | 0.4958  | 0.013731 | 0.21051  | 0.00926  | 1 |
| GO_bp:go_norepinephrine_metabolic_process                                             | 6   | 0.85084 | 0.014907 | 0.36136  | 0.009277 | 1 |
| GO_bp:go_associative_learning                                                         | 77  | 0.2219  | 0.013902 | 0.09437  | 0.009357 | 1 |
| GO_mf:go_histone_methyltransferase_activity_h3_k27_specific                           | 5   | 0.80121 | 0.012814 | 0.34129  | 0.009453 | 1 |
| GO_mf:go_delayed_rectifier_potassium_channel_activity                                 | 32  | 0.37989 | 0.015361 | 0.16189  | 0.009478 | 1 |
| GO_bp:go_antibiotic_metabolic_process                                                 | 88  | 0.21191 | 0.014188 | 0.090313 | 0.009484 | 1 |

**Supplementary Table 5.** Results of MAGMA tissue expression analysis as computed by FUMA. Tissues are sorted by ascending p-value of association. This analysis was performed on all sequence variants and their associations with social trust in the meta-analysis.

**GTEx v8 53 tissue types**

| <b>FULL_NAME</b>                      | <b>TYPE</b> | <b>NGENES</b> | <b>BETA</b> | <b>BETA_STD</b> | <b>SE</b> | <b>P</b> |
|---------------------------------------|-------------|---------------|-------------|-----------------|-----------|----------|
| Colon_Sigmoid                         | COVAR       | 17864         | 0.016814    | 0.032901        | 0.011795  | 0.077007 |
| Liver                                 | COVAR       | 17864         | 0.00831     | 0.014948        | 0.005988  | 0.082605 |
| Bladder                               | COVAR       | 17864         | 0.015347    | 0.029911        | 0.012323  | 0.1065   |
| Nerve_Tibial                          | COVAR       | 17864         | 0.01077     | 0.021674        | 0.009456  | 0.12737  |
| Esophagus_Mucosa                      | COVAR       | 17864         | 0.007921    | 0.015315        | 0.007168  | 0.13459  |
| Skin_Sun_Exposed_Lower_leg            | COVAR       | 17864         | 0.006475    | 0.012566        | 0.0073    | 0.18752  |
| Colon_Transverse                      | COVAR       | 17864         | 0.00924     | 0.016992        | 0.010951  | 0.1994   |
| Testis                                | COVAR       | 17864         | 0.004273    | 0.0073667       | 0.00521   | 0.20606  |
| Skin_Not_Sun_Exposed_Suprapubic       | COVAR       | 17864         | 0.005858    | 0.0113          | 0.007272  | 0.21025  |
| Esophagus_Muscularis                  | COVAR       | 17864         | 0.006968    | 0.01374         | 0.011704  | 0.27581  |
| Vagina                                | COVAR       | 17864         | 0.005931    | 0.011343        | 0.010392  | 0.28409  |
| Artery_Tibial                         | COVAR       | 17864         | 0.005012    | 0.010311        | 0.009424  | 0.29743  |
| Stomach                               | COVAR       | 17864         | 0.005702    | 0.010357        | 0.011248  | 0.30609  |
| Brain_Cortex                          | COVAR       | 17864         | 0.00314     | 0.0057279       | 0.006684  | 0.31928  |
| Cervix_Ectocervix                     | COVAR       | 17864         | 0.005118    | 0.010029        | 0.011404  | 0.32681  |
| Brain_Putamen_basal_ganglia           | COVAR       | 17864         | 0.003287    | 0.0055931       | 0.007463  | 0.32983  |
| Brain_Anterior_cingulate_cortex_BA24  | COVAR       | 17864         | 0.002292    | 0.0040499       | 0.006775  | 0.36758  |
| Brain_Nucleus_accumbens_basal_ganglia | COVAR       | 17864         | 0.002264    | 0.00393         | 0.007128  | 0.37537  |
| Brain_Substantia_nigra                | COVAR       | 17864         | 0.002529    | 0.0043552       | 0.008091  | 0.37731  |
| Brain_Frontal_Cortex_BA9              | COVAR       | 17864         | 0.001961    | 0.0036156       | 0.006453  | 0.38059  |
| Adipose_Subcutaneous                  | COVAR       | 17864         | 0.002874    | 0.0057346       | 0.010029  | 0.38723  |
| Brain_Amygdala                        | COVAR       | 17864         | 0.001518    | 0.0025862       | 0.00736   | 0.41832  |
| Uterus                                | COVAR       | 17864         | 0.001846    | 0.0037577       | 0.01026   | 0.42862  |
| Brain_Cerebellum                      | COVAR       | 17864         | 0.000772    | 0.0015341       | 0.005885  | 0.4478   |
| Brain_Hippocampus                     | COVAR       | 17864         | 0.000677    | 0.0011465       | 0.007484  | 0.46397  |
| Brain_Spinal_cord_cervical_c-1        | COVAR       | 17864         | 0.000296    | 0.0005323       | 0.008126  | 0.48547  |

|                             |       |       |          |           |          |         |
|-----------------------------|-------|-------|----------|-----------|----------|---------|
| Brain_Cerebellar_Hemisphere | COVAR | 17864 | 2.18E-05 | 4.38E-05  | 0.005713 | 0.49848 |
| Brain_Caudate_basal_ganglia | COVAR | 17864 | -0.00013 | -0.00022  | 0.0074   | 0.50685 |
| Adrenal_Gland               | COVAR | 17864 | -0.00043 | -0.000828 | 0.009369 | 0.51825 |

**GTEx v8 30 general tissue types**

| <b>VARIABLE</b> | <b>TYPE</b> | <b>NGENES</b> | <b>BETA</b> | <b>BETA_STD</b> | <b>SE</b> | <b>P</b> |
|-----------------|-------------|---------------|-------------|-----------------|-----------|----------|
| Bladder         | COVAR       | 17864         | 0.026504    | 0.051657        | 0.015227  | 0.040892 |
| Colon           | COVAR       | 17864         | 0.023999    | 0.044933        | 0.014959  | 0.054338 |
| Liver           | COVAR       | 17864         | 0.00935     | 0.01682         | 0.006191  | 0.065505 |
| Esophagus       | COVAR       | 17864         | 0.022444    | 0.04228         | 0.016235  | 0.083429 |
| Nerve           | COVAR       | 17864         | 0.012269    | 0.024691        | 0.009776  | 0.10476  |
| Testis          | COVAR       | 17864         | 0.004395    | 0.0075766       | 0.005219  | 0.19983  |
| Vagina          | COVAR       | 17864         | 0.009831    | 0.018803        | 0.011992  | 0.20617  |
| Skin            | COVAR       | 17864         | 0.007263    | 0.013859        | 0.00949   | 0.22204  |
| Stomach         | COVAR       | 17864         | 0.009284    | 0.016861        | 0.01279   | 0.23398  |
| Uterus          | COVAR       | 17864         | 0.003668    | 0.0074683       | 0.011304  | 0.37279  |
| Cervix_Uteri    | COVAR       | 17864         | 0.004099    | 0.0080512       | 0.013413  | 0.37996  |
| Blood_Vessel    | COVAR       | 17864         | 0.001801    | 0.0036521       | 0.011096  | 0.43552  |
| Adrenal_Gland   | COVAR       | 17864         | 0.000265    | 0.0005118       | 0.009669  | 0.48907  |
| Prostate        | COVAR       | 17864         | 9.65E-05    | 0.000183        | 0.013154  | 0.49707  |
| Brain           | COVAR       | 17864         | -0.00019    | -0.000337       | 0.006453  | 0.51198  |
| Breast          | COVAR       | 17864         | -0.00056    | -0.001075       | 0.014966  | 0.5149   |
| Small_Intestine | COVAR       | 17864         | -0.00066    | -0.001215       | 0.010251  | 0.52569  |
| Adipose_Tissue  | COVAR       | 17864         | -0.0009     | -0.001772       | 0.012569  | 0.52862  |
| Blood           | COVAR       | 17864         | -0.00068    | -0.001227       | 0.00582   | 0.54669  |
| Fallopian_Tube  | COVAR       | 17864         | -0.00161    | -0.003113       | 0.013122  | 0.54868  |
| Ovary           | COVAR       | 17864         | -0.00245    | -0.004969       | 0.009731  | 0.5995   |
| Spleen          | COVAR       | 17864         | -0.00203    | -0.004033       | 0.007405  | 0.60822  |
| Muscle          | COVAR       | 17864         | -0.00257    | -0.004861       | 0.006453  | 0.65488  |
| Kidney          | COVAR       | 17864         | -0.00601    | -0.010579       | 0.008967  | 0.74864  |
| Salivary_Gland  | COVAR       | 17864         | -0.00854    | -0.015897       | 0.010268  | 0.79726  |
| Lung            | COVAR       | 17864         | -0.01       | -0.019359       | 0.00995   | 0.84263  |

|           |       |       |          |           |          |         |
|-----------|-------|-------|----------|-----------|----------|---------|
| Pancreas  | COVAR | 17864 | -0.00998 | -0.016695 | 0.00827  | 0.88634 |
| Pituitary | COVAR | 17864 | -0.01139 | -0.02126  | 0.007779 | 0.92841 |
| Heart     | COVAR | 17864 | -0.01404 | -0.024143 | 0.008933 | 0.94198 |

#### Brainspan 11 general developmental stages of brain samples

| VARIABLE           | TYPE  | NGENES | BETA     | BETA_STD  | SE       | P       |
|--------------------|-------|--------|----------|-----------|----------|---------|
| Middle_adulthood   | COVAR | 14071  | 0.010785 | 0.016056  | 0.014798 | 0.23306 |
| Late_mid-prenatal  | COVAR | 14071  | 0.007336 | 0.010892  | 0.01321  | 0.28935 |
| Late_childhood     | COVAR | 14071  | 0.006594 | 0.0097282 | 0.017836 | 0.3558  |
| Early_prenatal     | COVAR | 14071  | 0.002659 | 0.0040113 | 0.009253 | 0.38693 |
| Late_infancy       | COVAR | 14071  | 0.002776 | 0.0040556 | 0.019685 | 0.44393 |
| Early_mid-prenatal | COVAR | 14071  | 0.001475 | 0.0022195 | 0.010624 | 0.4448  |
| Early_infancy      | COVAR | 14071  | -0.00135 | -0.00191  | 0.027377 | 0.5196  |
| Adolescence        | COVAR | 14071  | -0.00484 | -0.006843 | 0.019116 | 0.6     |
| Early_childhood    | COVAR | 14071  | -0.00407 | -0.005695 | 0.013642 | 0.61731 |
| Young_adulthood    | COVAR | 14071  | -0.01267 | -0.018085 | 0.017446 | 0.76616 |
| Late_prenatal      | COVAR | 14071  | -0.01972 | -0.027141 | 0.015252 | 0.90193 |

#### Brainspan 29 different ages of brain samples

| VARIABLE | TYPE  | NGENES   | BETA      | BETA_STD  | SE       | P        |
|----------|-------|----------|-----------|-----------|----------|----------|
| 10_mos   | COVAR | 14535    | 0.000915  | 0.027962  | 0.000627 | 0.072384 |
| 19_pcw   | COVAR | 14535    | 0.000448  | 0.014343  | 0.000371 | 0.11359  |
| 8_yrs    | COVAR | 14535    | 0.000689  | 0.020605  | 0.000674 | 0.15328  |
| 4_mos    | COVAR | 14535    | 0.001015  | 0.027474  | 0.001012 | 0.15809  |
| 17_pcw   | COVAR | 1.45E+04 | 0.000268  | 0.0068709 | 0.000533 | 0.3075   |
| 4_yrs    | COVAR | 14535    | 0.000168  | 0.00585   | 0.00043  | 0.34782  |
| 21_pcw   | COVAR | 14535    | 0.000103  | 0.0026461 | 0.000562 | 0.42729  |
| 24_pcw   | COVAR | 14535    | 4.63E-05  | 0.0013754 | 0.000487 | 0.46216  |
| 16_pcw   | COVAR | 14535    | -3.13E-05 | -0.000823 | 0.000483 | 0.52581  |
| 18_yrs   | COVAR | 14535    | -0.00019  | -0.004104 | 0.00071  | 0.60504  |
| 12_pcw   | COVAR | 14535    | -0.00017  | -0.004703 | 0.000407 | 0.65965  |

|        |       |          |          |           |          |         |
|--------|-------|----------|----------|-----------|----------|---------|
| 37_pcw | COVAR | 14535    | -0.00022 | -0.006852 | 0.000506 | 0.67018 |
| 40_yrs | COVAR | 14535    | -0.0003  | -0.008763 | 0.000604 | 0.69121 |
| 13_pcw | COVAR | 14535    | -0.0002  | -0.005713 | 0.000387 | 0.69291 |
| 26_pcw | COVAR | 1.45E+04 | -0.00045 | -0.009449 | 0.000834 | 0.70331 |
| 8_pcw  | COVAR | 14535    | -0.00019 | -0.00553  | 0.000343 | 0.70755 |
| 13_yrs | COVAR | 14535    | -0.00056 | -0.012834 | 0.000803 | 0.7553  |
| 11_yrs | COVAR | 14535    | -0.0005  | -0.0135   | 0.000681 | 0.77081 |
| 2_yrs  | COVAR | 14535    | -0.00039 | -0.008247 | 0.000517 | 0.77243 |
| 1_yrs  | COVAR | 14535    | -0.00066 | -0.015439 | 0.000738 | 0.81279 |
| 9_pcw  | COVAR | 14535    | -0.0004  | -0.009687 | 0.000425 | 0.82588 |
| 30_yrs | COVAR | 14535    | -0.00052 | -0.015361 | 0.000527 | 0.83872 |
| 19_yrs | COVAR | 14535    | -0.00073 | -0.0191   | 0.000633 | 0.87591 |
| 36_yrs | COVAR | 14535    | -0.00105 | -0.022512 | 0.000807 | 0.90239 |
| 37_yrs | COVAR | 14535    | -0.00101 | -0.022282 | 0.000775 | 0.90443 |
| 3_yrs  | COVAR | 14535    | -0.00082 | -0.020719 | 0.000598 | 0.9137  |
| 21_yrs | COVAR | 14535    | -0.00102 | -0.024448 | 0.000708 | 0.92592 |
| 15_yrs | COVAR | 14535    | -0.00111 | -0.02641  | 0.000725 | 0.93759 |
| 23_yrs | COVAR | 14535    | -0.00139 | -0.031366 | 0.000838 | 0.9513  |

**Supplementary Table 6.** Summary of the enrichment of mapped genes in gene sets as computed by FUMA. In this analysis, only sequence variants with association p-value < 1e-05 in the meta-analysis were considered. Variant-to-gene mapping was performed based on all the available eQTL maps (EyeGEx, eQTL catalogue, PsychENCODE, van der Wijst et al. scRNA eQTLs, DICE, eQTLGen, Blood eQTLs, MuTHER, xQTLServer, CommonMind Consortium, BRAINEAC and GTEx v8), Hi-C chromatin interaction data of 23 tissue and cell types from GEO:GSE87112, along with PsychENCODE and FANTOM datasets. Results are sorted by ascending p-value. Gene sets from MSigDB, WikiPathways and reported genes from the GWAS catalog were included in the analysis. Multiple test correction was performed per category.

| Category             | GeneSet | N_genes | N_overlap | p-value  | adjP     | genes                                                                                                                                                                                                                                                                                                                                                                                                                                                                                                                                                                                        | link                                                                                                                                |
|----------------------|---------|---------|-----------|----------|----------|----------------------------------------------------------------------------------------------------------------------------------------------------------------------------------------------------------------------------------------------------------------------------------------------------------------------------------------------------------------------------------------------------------------------------------------------------------------------------------------------------------------------------------------------------------------------------------------------|-------------------------------------------------------------------------------------------------------------------------------------|
| Positional_gene_sets | chr1q23 | 193     | 65        | 5.79E-66 | 1.73E-63 | <i>HDGF:FCRL5:FCRL4:FCRL3:VDAC1P9:<br/> FCRL2:FCRL1:MRPS21P2:RP11-<br/> 404O13.1:ELL2P1:CD1D:OR10T2:OR<br/> 10K2:OR10R2:OR10R3P:OR10R1P:O<br/> R6Y1:OR6P1:OR10X1:OR10Z1:SPTA1<br/> :OR6K1P:OR6K2:OR6K3:OR6K4P:OR<br/> 6K5P:OR6K6:OR6N1:OR6N2:OR2AQ<br/> 1P:OR10AA1P:MNDA:PYHIN1:IFI16:<br/> AIM2:RAD1P2:CADM3:RNA5SP60:D<br/> ARC:MPTX1:OR10J2P:FCER1A:OR10J<br/> 3:OR10J7P:OR10J8P:OR10J4:OR10J1<br/> :OR10J5:OR10J6P:CRPP1:CRP:DUSP<br/> 23:C1orf204:RP11-<br/> 190A12.7:CCDC19:hsa-mir-<br/> 4259:SLAMF9:LINC01133:SLAMF6:C<br/> D84:RNA5SP62:RNA5SP63:NMNAT1<br/> P2:PBX1:LMX1A:RXRG</i> | <a href="http://www.gsea-msigdb.org/gsea/msigdb/cards/chr1q23">http://www.gsea-<br/> msigdb.org/gsea/msigdb/<br/> cards/chr1q23</a> |

|                      |          |     |    |          |          |                                                                                                                                                                                                                                                                                                                                                                                                                                                                                                                                                                                                                                                                                                                                                                                                                          |                                                                                                                                  |
|----------------------|----------|-----|----|----------|----------|--------------------------------------------------------------------------------------------------------------------------------------------------------------------------------------------------------------------------------------------------------------------------------------------------------------------------------------------------------------------------------------------------------------------------------------------------------------------------------------------------------------------------------------------------------------------------------------------------------------------------------------------------------------------------------------------------------------------------------------------------------------------------------------------------------------------------|----------------------------------------------------------------------------------------------------------------------------------|
| Positional_gene_sets | chr11q12 | 309 | 67 | 8.99E-54 | 1.34E-51 | <p>OR5W2:OR5I1:OR10AF1P:OR5F1:OR5F2P:OR5AS1:OR5AQ1P:OR5J1P:OR5BE1P:OR8I2:OR8I4P:OR8H2:OR8K5:OR5J7P:OR5J2:OR8V1P:OR8J2:OR8K3:FAM8A2P:OR8K2P:OR8K1:OR5M6P:OR5M5P:OR5M11:OR5M10:OR5M13P:OR5M1:OR5AM1P:OR5M12P:OR5G5P:OR5G3:AP000479.1:OR5AK3P:OR5AK2:OR5AK1P:OR5BQ1P:OR5AK4P:OR5AO1P:OR5BP1P:LRRC55:APLNR:TNKS1BP1:PRG2:SLC43A3:TIMM10:SERPING1:OR5BC1P:OR5B19P:OR5B10P:CNTF:GLYAT:GLYATL2:GLYATL1P2:GLYATL1:GLYATL1P3:FAM111B:MPEG1:RN7SL42P:SLC25A47P1:OR5A1:OR4D6:OR4D10:OR4D8P:OR4D11:GIF:TCN1:SRD5A3P1</p> <p>RNU2-25P:RN7SL592P:RP11-125B21.2:KCNV2:KIAA0020:CARM1P1:RFX3:RP11-509J21.1:GLIS3:GLIS3-AS1:RNU6-694P:SLC1A1:SPATA6L:PPAPDC2:RP11-6J24.6:CDC37L1:AK3:MIR101-2:HNRNPA1P41:JAK2:MTND6P5:MTND1P11:MTND4P14:MTND5P14:IGHEP2:INSL6:INSL4:RLN2:HMG2P31:RLN1:PLGRKT:CD274:PDCD1LG2:KIAA1432:ERMP1:MLANA:IL33</p> | <p><a href="http://www.gsea-msigdb.org/gsea/msigdb/cards/chr11q12">http://www.gsea-msigdb.org/gsea/msigdb/cards/chr11q12</a></p> |
| Positional_gene_sets | chr9p24  | 71  | 37 | 1.09E-46 | 1.09E-44 | <p>RNU2-25P:RN7SL592P:RP11-125B21.2:KCNV2:KIAA0020:CARM1P1:RFX3:RP11-509J21.1:GLIS3:GLIS3-AS1:RNU6-694P:SLC1A1:SPATA6L:PPAPDC2:RP11-6J24.6:CDC37L1:AK3:MIR101-2:HNRNPA1P41:JAK2:MTND6P5:MTND1P11:MTND4P14:MTND5P14:IGHEP2:INSL6:INSL4:RLN2:HMG2P31:RLN1:PLGRKT:CD274:PDCD1LG2:KIAA1432:ERMP1:MLANA:IL33</p>                                                                                                                                                                                                                                                                                                                                                                                                                                                                                                              | <p><a href="http://www.gsea-msigdb.org/gsea/msigdb/cards/chr9p24">http://www.gsea-msigdb.org/gsea/msigdb/cards/chr9p24</a></p>   |



|                      |          |     |    |          |          |                                                                                                                                                                                                                                                                                                                                                                                                                                                                                                                                                                                                                                                                                                                            |                                                                                                                                                                                                                                                                                                                                                                                                |
|----------------------|----------|-----|----|----------|----------|----------------------------------------------------------------------------------------------------------------------------------------------------------------------------------------------------------------------------------------------------------------------------------------------------------------------------------------------------------------------------------------------------------------------------------------------------------------------------------------------------------------------------------------------------------------------------------------------------------------------------------------------------------------------------------------------------------------------------|------------------------------------------------------------------------------------------------------------------------------------------------------------------------------------------------------------------------------------------------------------------------------------------------------------------------------------------------------------------------------------------------|
| Positional_gene_sets | chr6p24  | 52  | 33 | 7.79E-46 | 5.83E-44 | <p>CAGE1:RIOK1:SNRNP48:BMP6:BLOC1S5-<br/> TXNDC5:PIP5K1P1:BLOC1S5:EEF1E1-BLOC1S5:EEF1E1:SLC35B3:HULC:OFCC1:RNU6ATAC21P:TFAP2A:TFAP2A-AS1:LINC00518:RP1-290I10.7:MIR5689:MRPL48P1:GCNT2:GCNT6:C6orf52:PAK1IP1:TMEM14C:TMEM14B:SYCP2L:RNA5SP203:MAK:GCM2:ELOVL2:ELOVL2-AS1:SMIM13:ERVFRD-1</p> <p>FAM20A:RP11-118B18.1:AC011591.1:ABCA8:ABCA9:ABCA9-AS1:ABCA6:MIR4524B:ABCA10:ABCAS1:SNRPGP4:MAP2K6:AC003051.1:AC004562.1:LINC01028:KCNJ16:KCNJ2-AS1:KCNJ2:CALM2P1:CASC17:RNU7-155P:AC005152.3:LINC01152:SOX9-AS1:AC007461.2:SOX9:LINC00511:RPL32P33</p> <p>RP11-280O1.2:LRR52:MGST3:ALDH9A1:TMCO1:UCK2:FAM78B:MIR921:FMO7P:RP11-276E17.2:FMO8P:FMO9P:FMO10P:RPL4P2:CNN2P10:POGK:DUTP6:GPA33:DUSP27:CD247:AKR1D1P1:CREG1</p> | <p><a href="http://www.gsea-msigdb.org/gsea/msigdb/cards/chr6p24">http://www.gsea-msigdb.org/gsea/msigdb/cards/chr6p24</a></p> <p><a href="http://www.gsea-msigdb.org/gsea/msigdb/cards/chr17q24">http://www.gsea-msigdb.org/gsea/msigdb/cards/chr17q24</a></p> <p><a href="http://www.gsea-msigdb.org/gsea/msigdb/cards/chr1q24">http://www.gsea-msigdb.org/gsea/msigdb/cards/chr1q24</a></p> |
| Positional_gene_sets | chr17q24 | 79  | 28 | 1.09E-29 | 6.53E-28 |                                                                                                                                                                                                                                                                                                                                                                                                                                                                                                                                                                                                                                                                                                                            |                                                                                                                                                                                                                                                                                                                                                                                                |
| Positional_gene_sets | chr1q24  | 106 | 22 | 5.81E-18 | 2.90E-16 |                                                                                                                                                                                                                                                                                                                                                                                                                                                                                                                                                                                                                                                                                                                            |                                                                                                                                                                                                                                                                                                                                                                                                |

|                      |                                    |     |    |          |          |                                                                                                                                                                                                                                                                                                                                                                                                                                                                                                                                                                                                                                                                                                                                                                                                                                                   |                                                                                                                                                                                             |
|----------------------|------------------------------------|-----|----|----------|----------|---------------------------------------------------------------------------------------------------------------------------------------------------------------------------------------------------------------------------------------------------------------------------------------------------------------------------------------------------------------------------------------------------------------------------------------------------------------------------------------------------------------------------------------------------------------------------------------------------------------------------------------------------------------------------------------------------------------------------------------------------------------------------------------------------------------------------------------------------|---------------------------------------------------------------------------------------------------------------------------------------------------------------------------------------------|
| GO_mf                | GO_OLFACTORY_RE<br>CEPTOR_ACTIVITY | 421 | 41 | 2.37E-19 | 3.90E-16 | <p>OR10T2:OR10K2:OR10R2:OR6Y1:OR<br/>6P1:OR10X1:OR10Z1:OR6K2:OR6K3:<br/>OR6K6:OR6N1:OR6N2:OR10J3:OR10<br/>J4:OR10J1:OR10J5:OR10J6P:OR4A16<br/>:OR5W2:OR5I1:OR5F1:OR5AS1:OR8I<br/>2:OR8H2:OR8K5:OR5J2:OR8J2:OR8K<br/>3:OR8K1:OR5M11:OR5M10:OR5M1:<br/>OR5G3:OR5AK3P:OR5AK2:OR5A1:O<br/>R4D6:OR4D10:OR4D11:OR7A5:OR7<br/>A10<br/>OR10T2:OR10K2:OR10R2:OR6Y1:OR<br/>6P1:OR10X1:OR10Z1:OR6K2:OR6K3:<br/>OR6K6:OR6N1:OR6N2:OR10J3:OR10<br/>J4:OR10J1:OR10J5:OR10J6P:OR4A16<br/>:OR5W2:OR5I1:OR5F1:OR5AS1:OR8I<br/>2:OR8H2:OR8K5:OR5J2:OR8J2:OR8K<br/>3:OR8K1:OR5M11:OR5M10:OR5M1:<br/>OR5G3:OR5AK3P:OR5AK2:OR5A1:O<br/>R4D6:OR4D10:OR4D11:OR7A5:OR7<br/>A10<br/>RNU6-<br/>1232P:EEF1B2P2:VWA8P1:RPL27AP<br/>5:GCNT4:POC5:RNU6-<br/>680P:SV2C:IQGAP2:F2RL2:F2R:F2RL<br/>1:RN7SL208P:S100Z:RNU6ATAC36P:<br/>CRHBP:AGGF1:ZBED3:SNORA47:ZBE<br/>D3-AS1</p> | <p><a href="http://www.gsea-msigdb.org/gsea/msigdb/cards/GO_OLFACTORY_RECEPTOR_ACTIVITY">http://www.gsea-<br/>msigdb.org/gsea/msigdb/<br/>cards/GO_OLFACTORY_RE<br/>CEPTOR_ACTIVITY</a></p> |
| GO_bp                | GO_SENSORY_PERC<br>EPTION_OF_SMELL | 448 | 41 | 2.25E-18 | 1.66E-14 | <p>OR10T2:OR10K2:OR10R2:OR6Y1:OR<br/>6P1:OR10X1:OR10Z1:OR6K2:OR6K3:<br/>OR6K6:OR6N1:OR6N2:OR10J3:OR10<br/>J4:OR10J1:OR10J5:OR10J6P:OR4A16<br/>:OR5W2:OR5I1:OR5F1:OR5AS1:OR8I<br/>2:OR8H2:OR8K5:OR5J2:OR8J2:OR8K<br/>3:OR8K1:OR5M11:OR5M10:OR5M1:<br/>OR5G3:OR5AK3P:OR5AK2:OR5A1:O<br/>R4D6:OR4D10:OR4D11:OR7A5:OR7<br/>A10<br/>RNU6-<br/>1232P:EEF1B2P2:VWA8P1:RPL27AP<br/>5:GCNT4:POC5:RNU6-<br/>680P:SV2C:IQGAP2:F2RL2:F2R:F2RL<br/>1:RN7SL208P:S100Z:RNU6ATAC36P:<br/>CRHBP:AGGF1:ZBED3:SNORA47:ZBE<br/>D3-AS1</p>                                                                                                                                                                                                                                                                                                                             | <p><a href="http://www.gsea-msigdb.org/gsea/msigdb/cards/GO_SENSORY_PERCEPTION_OF_SMELL">http://www.gsea-<br/>msigdb.org/gsea/msigdb/<br/>cards/GO_SENSORY_PERC<br/>EPTION_OF_SMELL</a></p> |
| Positional_gene_sets | chr5q13                            | 106 | 20 | 1.34E-15 | 5.71E-14 | <p>680P:SV2C:IQGAP2:F2RL2:F2R:F2RL<br/>1:RN7SL208P:S100Z:RNU6ATAC36P:<br/>CRHBP:AGGF1:ZBED3:SNORA47:ZBE<br/>D3-AS1</p>                                                                                                                                                                                                                                                                                                                                                                                                                                                                                                                                                                                                                                                                                                                            | <p><a href="http://www.gsea-msigdb.org/gsea/msigdb/cards/chr5q13">http://www.gsea-<br/>msigdb.org/gsea/msigdb/<br/>cards/chr5q13</a></p>                                                    |

|                      |                                                         |     |    |          |          |                                                                                                                                                                                                                                                                                       |                                                                                                                                                                                                                                |
|----------------------|---------------------------------------------------------|-----|----|----------|----------|---------------------------------------------------------------------------------------------------------------------------------------------------------------------------------------------------------------------------------------------------------------------------------------|--------------------------------------------------------------------------------------------------------------------------------------------------------------------------------------------------------------------------------|
| Positional_gene_sets | chr12q23                                                | 125 | 21 | 3.03E-15 | 1.13E-13 | <p>ARL1:RNU6-1068P:RPS27P23:RNU5E-5P:RNA5SP367:SPIC:MYBPC1:SYCP3:RNU6-101P:RNA5SP368:RNU6-172P:RNU6-1183P:HSPE1P4:CCDC53:NUP37:PARPBP:PMCH:RN7SL793P:IGF1:RP11-626I20.3:STAB2</p>                                                                                                     | <p><a href="http://www.gsea-msigdb.org/gsea/msigdb/cards/chr12q23">http://www.gsea-msigdb.org/gsea/msigdb/cards/chr12q23</a></p>                                                                                               |
| Positional_gene_sets | chr22q12                                                | 180 | 24 | 6.99E-15 | 2.32E-13 | <p>SEZ6L:RNA5SP495:ASPHD2:HPS4:SRRD:TPST2:CRYBB1:CRYBA4:ISCA2P1:MIAT:RP1-90L6.3:RNU6-1066P:CTA-929C8.6:MN1:PITPNB:TTC28-AS1:MIR3199-2:RN7SL757P:RN7SL162P:ZNRFB3:ZNRFB3-IT1:ZNRFB3-AS1:RNU6-810P:THOC5</p>                                                                            | <p><a href="http://www.gsea-msigdb.org/gsea/msigdb/cards/chr22q12">http://www.gsea-msigdb.org/gsea/msigdb/cards/chr22q12</a></p>                                                                                               |
| GO_bp                | GO_DETECTION_OF_STIMULUS_INVOLVED_IN_SENSORY_PERCEPTION | 523 | 42 | 9.75E-17 | 3.58E-13 | <p>OR10T2:OR10K2:OR10R2:OR6Y1:OR6P1:OR10X1:OR10Z1:OR6K2:OR6K3:OR6K6:OR6N1:OR6N2:OR10J3:OR10J4:OR10J1:OR10J5:OR10J6P:OR4A16:OR5W2:OR5I1:OR5F1:OR5AS1:OR8I2:OR8H2:OR8K5:OR5J2:OR8J2:OR8K3:OR8K1:OR5M11:OR5M10:OR5M1:OR5G3:OR5AK3P:OR5AK2:OR5A1:OR4D6:OR4D10:OR4D11:OR7A5:OR7A10:EYS</p> | <p><a href="http://www.gsea-msigdb.org/gsea/msigdb/cards/GO_DETECTION_OF_STIMULUS_INVOLVED_IN_SENSORY_PERCEPTION">http://www.gsea-msigdb.org/gsea/msigdb/cards/GO_DETECTION_OF_STIMULUS_INVOLVED_IN_SENSORY_PERCEPTION</a></p> |

|                    |                                            |     |    |          |          |                                                                                                                                                                                                                                                                            |                                                                                                                                                                                               |
|--------------------|--------------------------------------------|-----|----|----------|----------|----------------------------------------------------------------------------------------------------------------------------------------------------------------------------------------------------------------------------------------------------------------------------|-----------------------------------------------------------------------------------------------------------------------------------------------------------------------------------------------|
| Reactome           | REACTOME_OLFACTORY_SIGNALING_PATHWAY       | 397 | 36 | 3.73E-16 | 5.59E-13 | OR10T2:OR10K2:OR10R2:OR6Y1:OR6P1:OR10X1:OR10Z1:OR6K2:OR6K3:OR6K6:OR6N1:OR6N2:OR10J3:OR10J1:OR10J5:OR4A16:OR5W2:OR5I1:OR5F1:OR5AS1:OR8I2:OR8H2:OR8K5:OR5J2:OR8K3:OR8K1:OR5M11:OR5M10:OR5M1:OR5AK2:OR5A1:OR4D6:OR4D10:OR4D11:OR7A5:OR7A10                                    | <a href="http://www.gsea-msigdb.org/gsea/msigdb/cards/REACTOME_OLFACTORY_SIGNALING_PATHWAY">http://www.gsea-msigdb.org/gsea/msigdb/cards/REACTOME_OLFACTORY_SIGNALING_PATHWAY</a>             |
| Canonical_Pathways | REACTOME_OLFACTORY_SIGNALING_PATHWAY       | 397 | 36 | 3.73E-16 | 8.20E-13 | OR10T2:OR10K2:OR10R2:OR6Y1:OR6P1:OR10X1:OR10Z1:OR6K2:OR6K3:OR6K6:OR6N1:OR6N2:OR10J3:OR10J1:OR10J5:OR4A16:OR5W2:OR5I1:OR5F1:OR5AS1:OR8I2:OR8H2:OR8K5:OR5J2:OR8K3:OR8K1:OR5M11:OR5M10:OR5M1:OR5AK2:OR5A1:OR4D6:OR4D10:OR4D11:OR7A5:OR7A10                                    | <a href="http://www.gsea-msigdb.org/gsea/msigdb/cards/REACTOME_OLFACTORY_SIGNALING_PATHWAY">http://www.gsea-msigdb.org/gsea/msigdb/cards/REACTOME_OLFACTORY_SIGNALING_PATHWAY</a>             |
| GO_bp              | GO_SENSORY_PERCEPTION_OF_CHEMICAL_STIMULUS | 519 | 41 | 4.04E-16 | 9.90E-13 | OR10T2:OR10K2:OR10R2:OR6Y1:OR6P1:OR10X1:OR10Z1:OR6K2:OR6K3:OR6K6:OR6N1:OR6N2:OR10J3:OR10J4:OR10J1:OR10J5:OR10J6P:OR4A16:OR5W2:OR5I1:OR5F1:OR5AS1:OR8I2:OR8H2:OR8K5:OR5J2:OR8J2:OR8K3:OR8K1:OR5M11:OR5M10:OR5M1:OR5G3:OR5AK3P:OR5AK2:OR5A1:OR4D6:OR4D10:OR4D11:OR7A5:OR7A10 | <a href="http://www.gsea-msigdb.org/gsea/msigdb/cards/GO_SENSORY_PERCEPTION_OF_CHEMICAL_STIMULUS">http://www.gsea-msigdb.org/gsea/msigdb/cards/GO_SENSORY_PERCEPTION_OF_CHEMICAL_STIMULUS</a> |

|                      |                                      |     |    |          |          |                                                                                                                                                                                                                                                       |                                                                                                                                                                                          |
|----------------------|--------------------------------------|-----|----|----------|----------|-------------------------------------------------------------------------------------------------------------------------------------------------------------------------------------------------------------------------------------------------------|------------------------------------------------------------------------------------------------------------------------------------------------------------------------------------------|
| KEGG                 | KEGG_OLFACTORY_ TRANSDUCTION         | 387 | 34 | 6.39E-15 | 1.19E-12 | <p><i>OR10T2:OR10K2:OR10R2:OR6Y1:OR10X1:OR10Z1:OR6K2:OR6K3:OR6K6:OR6N1:OR6N2:OR10J3:OR10J1:OR10J5:OR4A16:OR5I1:OR5F1:OR5AS1:OR8I2:OR8H2:OR8K5:OR5J2:OR8K3:OR8K1:OR5M11:OR5M10:OR5M1:OR5AK2:OR5A1:OR4D6:OR4D10:OR4D11:OR7A5:OR7A10</i></p>             | <p><a href="http://www.gsea-msigdb.org/gsea/msigdb/cards/KEGG_OLFACTORY_TRANSDUCTION">http://www.gsea-msigdb.org/gsea/msigdb/cards/KEGG_OLFACTORY_TRANSDUCTION</a></p>                   |
| Curated_gene_sets    | REACTOME_OLFACTORY_SIGNALING_PATHWAY | 397 | 36 | 3.73E-16 | 2.05E-12 | <p><i>OR10T2:OR10K2:OR10R2:OR6Y1:OR6P1:OR10X1:OR10Z1:OR6K2:OR6K3:OR6K6:OR6N1:OR6N2:OR10J3:OR10J1:OR10J5:OR4A16:OR5W2:OR5I1:OR5F1:OR5AS1:OR8I2:OR8H2:OR8K5:OR5J2:OR8K3:OR8K1:OR5M11:OR5M10:OR5M1:OR5AK2:OR5A1:OR4D6:OR4D10:OR4D11:OR7A5:OR7A10</i></p> | <p><a href="http://www.gsea-msigdb.org/gsea/msigdb/cards/REACTOME_OLFACTORY_SIGNALING_PATHWAY">http://www.gsea-msigdb.org/gsea/msigdb/cards/REACTOME_OLFACTORY_SIGNALING_PATHWAY</a></p> |
| Positional_gene_sets | chr11q14                             | 116 | 19 | 1.03E-13 | 3.07E-12 | <p><i>RP11-179A16.1:ANKRD42:DLG2:LDHAL6D:P:HNRNPA1P72:HNRNPCP6:RNU6-1292P:TMEM126B:TMEM126A:CREBZF:CCDC89:SYTL2:EED:SETP17:C11orf73:RN7SL225P:PTP4A1P6:PRSS23:RNU6-1135P</i></p>                                                                      | <p><a href="http://www.gsea-msigdb.org/gsea/msigdb/cards/chr11q14">http://www.gsea-msigdb.org/gsea/msigdb/cards/chr11q14</a></p>                                                         |
| Canonical_Pathways   | KEGG_OLFACTORY_ TRANSDUCTION         | 387 | 34 | 6.39E-15 | 5.52E-12 | <p><i>OR10T2:OR10K2:OR10R2:OR6Y1:OR10X1:OR10Z1:OR6K2:OR6K3:OR6K6:OR6N1:OR6N2:OR10J3:OR10J1:OR10J5:OR4A16:OR5I1:OR5F1:OR5AS1:OR8I2:OR8H2:OR8K5:OR5J2:OR8K3:OR8K1:OR5M11:OR5M10:OR5M1:OR5AK2:OR5A1:OR4D6:OR4D10:OR4D11:OR7A5:OR7A10</i></p>             | <p><a href="http://www.gsea-msigdb.org/gsea/msigdb/cards/KEGG_OLFACTORY_TRANSDUCTION">http://www.gsea-msigdb.org/gsea/msigdb/cards/KEGG_OLFACTORY_TRANSDUCTION</a></p>                   |

|                    |                                                |     |    |          |          |                                                                                                                                                                                                                                                                                                                                                                                               |                                                                                                                                                                                                                  |
|--------------------|------------------------------------------------|-----|----|----------|----------|-----------------------------------------------------------------------------------------------------------------------------------------------------------------------------------------------------------------------------------------------------------------------------------------------------------------------------------------------------------------------------------------------|------------------------------------------------------------------------------------------------------------------------------------------------------------------------------------------------------------------|
| Canonical_Pathways | REACTOME_G_ALPH<br>A_S_SIGNALLING_EV<br>ENTS   | 539 | 40 | 7.53E-15 | 5.52E-12 | <p>OR10T2:OR10K2:OR10R2:OR6Y1:OR<br/>6P1:OR10X1:OR10Z1:OR6K2:OR6K3:<br/>OR6K6:OR6N1:OR6N2:OR10J3:OR10<br/>J1:OR10J5:HTR7:OR4A16:OR5W2:O<br/>R5I1:OR5F1:OR5AS1:OR8I2:OR8H2:<br/>OR8K5:OR5J2:OR8K3:OR8K1:OR5M<br/>11:OR5M10:OR5M1:OR5AK2:OR5A1<br/>:OR4D6:OR4D10:OR4D11:ADCYAP1:<br/>OR7A5:OR7A10:INSL3:RLN2</p>                                                                                | <p><a href="http://www.gsea-msigdb.org/gsea/msigdb/cards/REACTOME_G_ALPHA_S_SIGNALLING_EVENT">http://www.gsea-<br/>msigdb.org/gsea/msigdb/<br/>cards/REACTOME_G_ALP<br/>HA_S_SIGNALLING_EVENT</a></p>            |
| Reactome           | REACTOME_G_ALPH<br>A_S_SIGNALLING_EV<br>ENTS   | 539 | 40 | 7.53E-15 | 5.64E-12 | <p>OR10T2:OR10K2:OR10R2:OR6Y1:OR<br/>6P1:OR10X1:OR10Z1:OR6K2:OR6K3:<br/>OR6K6:OR6N1:OR6N2:OR10J3:OR10<br/>J1:OR10J5:HTR7:OR4A16:OR5W2:O<br/>R5I1:OR5F1:OR5AS1:OR8I2:OR8H2:<br/>OR8K5:OR5J2:OR8K3:OR8K1:OR5M<br/>11:OR5M10:OR5M1:OR5AK2:OR5A1<br/>:OR4D6:OR4D10:OR4D11:ADCYAP1:<br/>OR7A5:OR7A10:INSL3:RLN2</p>                                                                                | <p><a href="http://www.gsea-msigdb.org/gsea/msigdb/cards/REACTOME_G_ALPHA_S_SIGNALLING_EVENT">http://www.gsea-<br/>msigdb.org/gsea/msigdb/<br/>cards/REACTOME_G_ALP<br/>HA_S_SIGNALLING_EVENT</a></p>            |
| GO_mf              | GO_G_PROTEIN_CO<br>UPLED_RECEPTOR_<br>ACTIVITY | 857 | 51 | 1.04E-14 | 8.54E-12 | <p>OR10T2:OR10K2:OR10R2:OR6Y1:OR<br/>6P1:OR10X1:OR10Z1:OR6K2:OR6K3:<br/>OR6K6:OR6N1:OR6N2:DARC:OR10J3<br/>:OR10J4:OR10J1:OR10J5:OR10J6P:H<br/>TR7:PRLHR:OR4A16:OR5W2:OR5I1:<br/>OR5F1:OR5AS1:OR8I2:OR8H2:OR8K<br/>5:OR5J2:OR8J2:OR8K3:OR8K1:OR5<br/>M11:OR5M10:OR5M1:OR5G3:OR5A<br/>K3P:OR5AK2:APLNR:OR5A1:OR4D6:<br/>OR4D10:OR4D11:GPR133:OR7A5:O<br/>R7A10:F2RL3:CXCR4:F2RL2:F2R<br/>L1</p> | <p><a href="http://www.gsea-msigdb.org/gsea/msigdb/cards/GO_G_PROTEIN_COUPLED_RECEPTOR_ACTIVITY">http://www.gsea-<br/>msigdb.org/gsea/msigdb/<br/>cards/GO_G_PROTEIN_CO<br/>UPLED_RECEPTOR_ACTIVI<br/>TY</a></p> |

|                      |                                      |     |    |          |          |                                                                                                                                                                                                                                                                        |                                                                                                                                                                                        |
|----------------------|--------------------------------------|-----|----|----------|----------|------------------------------------------------------------------------------------------------------------------------------------------------------------------------------------------------------------------------------------------------------------------------|----------------------------------------------------------------------------------------------------------------------------------------------------------------------------------------|
| Curated_gene_sets    | KEGG_OLFACTORY_TRANSDUCTION          | 387 | 34 | 6.39E-15 | 1.38E-11 | <p>OR10T2:OR10K2:OR10R2:OR6Y1:OR10X1:OR10Z1:OR6K2:OR6K3:OR6K6:OR6N1:OR6N2:OR10J3:OR10J1:OR10J5:OR4A16:OR5I1:OR5F1:OR5AS1:OR8I2:OR8H2:OR8K5:OR5J2:OR8K3:OR8K1:OR5M11:OR5M10:OR5M1:OR5AK2:OR5A1:OR4D6:OR4D10:OR4D11:OR7A5:OR7A10</p>                                     | <p><a href="http://www.gsea-msigdb.org/gsea/msigdb/cards/KEGG_OLFACTORY_TRANSDUCTION">http://www.gsea-msigdb.org/gsea/msigdb/cards/KEGG_OLFACTORY_TRANSDUCTION</a></p>                 |
| Curated_gene_sets    | REACTOME_G_ALPHA_S_SIGNALLING_EVENTS | 539 | 40 | 7.53E-15 | 1.38E-11 | <p>OR10T2:OR10K2:OR10R2:OR6Y1:OR6P1:OR10X1:OR10Z1:OR6K2:OR6K3:OR6K6:OR6N1:OR6N2:OR10J3:OR10J1:OR10J5:HTR7:OR4A16:OR5W2:OR5I1:OR5F1:OR5AS1:OR8I2:OR8H2:OR8K5:OR5J2:OR8K3:OR8K1:OR5M11:OR5M10:OR5M1:OR5AK2:OR5A1:OR4D6:OR4D10:OR4D11:ADCYAP1:OR7A5:OR7A10:INSL3:RLN2</p> | <p><a href="http://www.gsea-msigdb.org/gsea/msigdb/cards/REACTOME_G_ALPHA_S_SIGNALLING_EVENT">http://www.gsea-msigdb.org/gsea/msigdb/cards/REACTOME_G_ALPHA_S_SIGNALLING_EVENT</a></p> |
| GO_mf                | GO_ODORANT_BINDING                   | 94  | 18 | 2.70E-14 | 1.48E-11 | <p>OR5W2:OR5I1:OR5F1:OR5AS1:OR8I2:OR8H2:OR8K5:OR5J2:OR8J2:OR8K3:OR8K1:OR5M11:OR5M10:OR5M1:OR5G3:OR5AK3P:OR5AK2:OR5A1</p>                                                                                                                                               | <p><a href="http://www.gsea-msigdb.org/gsea/msigdb/cards/GO_ODORANT_BINDING">http://www.gsea-msigdb.org/gsea/msigdb/cards/GO_ODORANT_BINDING</a></p>                                   |
| Positional_gene_sets | chr10q26                             | 173 | 21 | 2.20E-12 | 5.97E-11 | <p>EMX2OS:EMX2:SLC25A18P1:PRLHR:RN7SL846P:PHACTR2P1:MIR4682:NACAP2:PPAPDC1A:C10orf85:WDR11-AS1:WDR11:FGFR2:RPS15AP5:RNU6-728P:PLEKHA1:MIR3941:CUZD1:FA M24B:C10orf88:PSTK</p>                                                                                          | <p><a href="http://www.gsea-msigdb.org/gsea/msigdb/cards/chr10q26">http://www.gsea-msigdb.org/gsea/msigdb/cards/chr10q26</a></p>                                                       |

|                      |                                   |     |    |          |          |                                                                                                                                                                                                                                                                                                                                                                                                                                                                                                                                                                                                                                                                                                                                                                                                                                                                                 |                                                                                                                                                                                                                                                                                                                                                                                                                                                                                                                                                                                             |
|----------------------|-----------------------------------|-----|----|----------|----------|---------------------------------------------------------------------------------------------------------------------------------------------------------------------------------------------------------------------------------------------------------------------------------------------------------------------------------------------------------------------------------------------------------------------------------------------------------------------------------------------------------------------------------------------------------------------------------------------------------------------------------------------------------------------------------------------------------------------------------------------------------------------------------------------------------------------------------------------------------------------------------|---------------------------------------------------------------------------------------------------------------------------------------------------------------------------------------------------------------------------------------------------------------------------------------------------------------------------------------------------------------------------------------------------------------------------------------------------------------------------------------------------------------------------------------------------------------------------------------------|
| GO_bp                | GO_DETECTION_OF_STIMULUS          | 682 | 43 | 2.03E-13 | 3.73E-10 | <p>CD1D:OR10T2:OR10K2:OR10R2:OR6Y1:OR6P1:OR10X1:OR10Z1:OR6K2:OR6K3:OR6K6:OR6N1:OR6N2:OR10J3:OR10J4:OR10J1:OR10J5:OR10J6P:OR4A16:OR5W2:OR5I1:OR5F1:OR5AS1:OR8I2:OR8H2:OR8K5:OR5J2:OR8J2:OR8K3:OR8K1:OR5M11:OR5M10:OR5M1:OR5G3:OR5AK3P:OR5AK2:OR5A1:OR4D6:OR4D10:OR4D11:OR7A5:OR7A10:EYS</p> <p>OR10T2:OR10K2:OR10R2:OR6Y1:OR6P1:OR10X1:OR10Z1:OR6K2:OR6K3:OR6K6:OR6N1:OR6N2:OR10J3:OR10J4:OR10J1:OR10J5:OR10J6P:OR4A16:OR5W2:OR5I1:OR5F1:OR5AS1:OR8I2:OR8H2:OR8K5:OR5J2:OR8J2:OR8K3:OR8K1:OR5M11:OR5M10:OR5M1:OR5G3:OR5AK3P:OR5AK2:TIMM10:OR5A1:OR4D6:OR4D10:OR4D11:DLG2:ADCYAP1:OR7A5:OR7A10:RAB3A:CRYBB1:CRYBA4:SOX14:F2R:TFAP2A:EYS</p> <p>RN7SL120P:CNTN6:RPL23AP39:RPL21P17:RN7SKP144:CNTN4:DNAJC19P4:CNTN4-AS1:CRBN:SETMAR</p> <p>RNA5SP297:DIP2C:RNA5SP298:RN7SL754P:MIR5699:PRR26:LARP4B:GTPBP4:IDI1:WDR37:PFKP:PITRM1-AS1</p> <p>PYHIN1:IFI16:AIM2:CADM3:DARC:MPHX1</p> | <p><a href="http://www.gsea-msigdb.org/gsea/msigdb/cards/GO_DETECTION_OF_STIMULUS">http://www.gsea-msigdb.org/gsea/msigdb/cards/GO_DETECTION_OF_STIMULUS</a></p> <p><a href="http://www.gsea-msigdb.org/gsea/msigdb/cards/GO_SENSORY_PERCEPTION">http://www.gsea-msigdb.org/gsea/msigdb/cards/GO_SENSORY_PERCEPTION</a></p> <p><a href="http://www.gsea-msigdb.org/gsea/msigdb/cards/chr3p26">http://www.gsea-msigdb.org/gsea/msigdb/cards/chr3p26</a></p> <p><a href="http://www.gsea-msigdb.org/gsea/msigdb/cards/chr10p15">http://www.gsea-msigdb.org/gsea/msigdb/cards/chr10p15</a></p> |
| GO_bp                | GO_SENSORY_PERCEPTION             | 960 | 51 | 8.06E-13 | 1.18E-09 |                                                                                                                                                                                                                                                                                                                                                                                                                                                                                                                                                                                                                                                                                                                                                                                                                                                                                 |                                                                                                                                                                                                                                                                                                                                                                                                                                                                                                                                                                                             |
| Positional_gene_sets | chr3p26                           | 39  | 10 | 7.24E-10 | 1.81E-08 |                                                                                                                                                                                                                                                                                                                                                                                                                                                                                                                                                                                                                                                                                                                                                                                                                                                                                 |                                                                                                                                                                                                                                                                                                                                                                                                                                                                                                                                                                                             |
| Positional_gene_sets | chr10p15                          | 66  | 12 | 1.05E-09 | 2.41E-08 |                                                                                                                                                                                                                                                                                                                                                                                                                                                                                                                                                                                                                                                                                                                                                                                                                                                                                 |                                                                                                                                                                                                                                                                                                                                                                                                                                                                                                                                                                                             |
| GWAScatalog          | Neutrophil count in HIV-infection | 6   | 6  | 2.28E-11 | 4.14E-08 |                                                                                                                                                                                                                                                                                                                                                                                                                                                                                                                                                                                                                                                                                                                                                                                                                                                                                 |                                                                                                                                                                                                                                                                                                                                                                                                                                                                                                                                                                                             |



|                      |                            |      |    |          |          |                                                                                                                                                                                                                                                                                                                                              |                                                                                                                                                                      |
|----------------------|----------------------------|------|----|----------|----------|----------------------------------------------------------------------------------------------------------------------------------------------------------------------------------------------------------------------------------------------------------------------------------------------------------------------------------------------|----------------------------------------------------------------------------------------------------------------------------------------------------------------------|
| Reactome             | REACTOME_SIGNALING_BY_GPCR | 1169 | 52 | 3.14E-10 | 1.57E-07 | <p>OR10T2:OR10K2:OR10R2:OR6Y1:OR6P1:OR10X1:OR10Z1:OR6K2:OR6K3:OR6K6:OR6N1:OR6N2:DARC:OR10J3:OR10J1:OR10J5:HTR7:PRLHR:OR4A16:OR5W2:OR5I1:OR5F1:OR5AS1:OR8I2:OR8H2:OR8K5:OR5J2:OR8K3:OR8K1:OR5M11:OR5M10:OR5M1:OR5AK2:APLNR:OR5A1:OR4D6:OR4D10:OR4D11:PPP2R1B:PMCH:ADCYAP1:OR7A5:OR7A10:F2RL3:INSL3:CXCR4:F2RL2:F2R:F2RL1:CRHBP:RLN2:AWAT2</p> | <p><a href="http://www.gsea-msigdb.org/gsea/msigdb/cards/REACTOME_SIGNALING_BY_GPCR">http://www.gsea-msigdb.org/gsea/msigdb/cards/REACTOME_SIGNALING_BY_GPCR</a></p> |
| Positional_gene_sets | chrXq13                    | 132  | 15 | 7.74E-09 | 1.65E-07 | <p>ACTR3P2:SERBP1P1:PJA1:HMG1P35:LINC00269:CYCSP43:FAM155B:EDA:MIR676:AWAT2:OTUD6A:MTND4P31:IGBP1:RNU1-56P:SOCS5P4</p>                                                                                                                                                                                                                       | <p><a href="http://www.gsea-msigdb.org/gsea/msigdb/cards/chrXq13">http://www.gsea-msigdb.org/gsea/msigdb/cards/chrXq13</a></p>                                       |
| Canonical_Pathways   | REACTOME_SIGNALING_BY_GPCR | 1169 | 52 | 3.14E-10 | 1.73E-07 | <p>OR10T2:OR10K2:OR10R2:OR6Y1:OR6P1:OR10X1:OR10Z1:OR6K2:OR6K3:OR6K6:OR6N1:OR6N2:DARC:OR10J3:OR10J1:OR10J5:HTR7:PRLHR:OR4A16:OR5W2:OR5I1:OR5F1:OR5AS1:OR8I2:OR8H2:OR8K5:OR5J2:OR8K3:OR8K1:OR5M11:OR5M10:OR5M1:OR5AK2:APLNR:OR5A1:OR4D6:OR4D10:OR4D11:PPP2R1B:PMCH:ADCYAP1:OR7A5:OR7A10:F2RL3:INSL3:CXCR4:F2RL2:F2R:F2RL1:CRHBP:RLN2:AWAT2</p> | <p><a href="http://www.gsea-msigdb.org/gsea/msigdb/cards/REACTOME_SIGNALING_BY_GPCR">http://www.gsea-msigdb.org/gsea/msigdb/cards/REACTOME_SIGNALING_BY_GPCR</a></p> |

|       |                                                 |      |    |          |          |                                                                                                                                                                                                                                                                                                                                                                                                |                                                                                                                                                                                                                |
|-------|-------------------------------------------------|------|----|----------|----------|------------------------------------------------------------------------------------------------------------------------------------------------------------------------------------------------------------------------------------------------------------------------------------------------------------------------------------------------------------------------------------------------|----------------------------------------------------------------------------------------------------------------------------------------------------------------------------------------------------------------|
| GO_mf | GO_TRANSMEMBRANE_SIGNALING_RECEPTOR_ACTIVITY    | 1253 | 54 | 4.38E-10 | 1.80E-07 | <p>OR10T2:OR10K2:OR10R2:OR6Y1:OR6P1:OR10X1:OR10Z1:OR6K2:OR6K3:OR6K6:OR6N1:OR6N2:DARC:OR10J3:OR10J4:OR10J1:OR10J5:OR10J6P:C<br/>D247:HTR7:PRLHR:FGFR2:OR4A16:OR5W2:OR5I1:OR5F1:OR5AS1:OR8I2:OR8H2:OR8K5:OR5J2:OR8J2:OR8K3:OR8K1:OR5M11:OR5M10:OR5M1:OR5G3:OR5AK3P:OR5AK2:APLNR:OR5A1:OR4D6:OR4D10:OR4D11:GPR133:NTRK3:OR7A5:OR7A10:F2RL3:CXC<br/>R4:F2RL2:F2R:F2RL1</p>                         | <p><a href="http://www.gsea-msigdb.org/gsea/msigdb/cards/GO_TRANSMEMBRANE_SIGNALING_RECEPTOR_ACTIVITY">http://www.gsea-msigdb.org/gsea/msigdb/cards/GO_TRANSMEMBRANE_SIGNALING_RECEPTOR_ACTIVITY</a></p>       |
| GO_bp | GO_G_PROTEIN_COUPLED_RECEPTOR_SIGNALING_PATHWAY | 1363 | 58 | 1.53E-10 | 1.88E-07 | <p>OR10T2:OR10K2:OR10R2:OR6Y1:OR6P1:OR10X1:OR10Z1:OR6K2:OR6K3:OR6K6:OR6N1:OR6N2:DARC:OR10J3:OR10J4:OR10J1:OR10J5:OR10J6P:H<br/>TR7:PRLHR:OR4A16:OR5W2:OR5I1:OR5F1:OR5AS1:OR8I2:OR8H2:OR8K5:OR5J2:OR8J2:OR8K3:OR8K1:OR5M11:OR5M10:OR5M1:OR5G3:OR5AK3P:OR5AK2:APLNR:OR5A1:OR4D6:OR4D10:OR4D11:PMCH:GPR133:AD<br/>CYAP1:OR7A5:OR7A10:F2RL3:INSL3:CXCR4:NXPH2:IQGAP2:F2RL2:F2R:F2RL1:JAK2:RLN2</p> | <p><a href="http://www.gsea-msigdb.org/gsea/msigdb/cards/GO_G_PROTEIN_COUPLED_RECEPTOR_SIGNALING_PATHWAY">http://www.gsea-msigdb.org/gsea/msigdb/cards/GO_G_PROTEIN_COUPLED_RECEPTOR_SIGNALING_PATHWAY</a></p> |

|                      |                            |      |    |          |          |                                                                                                                                                                                                                                                                                                                                       |                                                                                                                                                               |
|----------------------|----------------------------|------|----|----------|----------|---------------------------------------------------------------------------------------------------------------------------------------------------------------------------------------------------------------------------------------------------------------------------------------------------------------------------------------|---------------------------------------------------------------------------------------------------------------------------------------------------------------|
| Curated_gene_sets    | REACTOME_SIGNALING_BY_GPCR | 1169 | 52 | 3.14E-10 | 4.32E-07 | OR10T2:OR10K2:OR10R2:OR6Y1:OR6P1:OR10X1:OR10Z1:OR6K2:OR6K3:OR6K6:OR6N1:OR6N2:DARC:OR10J3:OR10J1:OR10J5:HTR7:PRLHR:OR4A16:OR5W2:OR5I1:OR5F1:OR5A51:OR8I2:OR8H2:OR8K5:OR5J2:OR8K3:OR8K1:OR5M11:OR5M10:OR5M1:OR5AK2:APLNR:OR5A1:OR4D6:OR4D10:OR4D11:PPP2R1B:PMCH:ADCYAP1:OR7A5:OR7A10:F2RL3:INSL3:CXCR4:F2RL2:F2R:F2RL1:CRHBP:RLN2:AWAT2 | <a href="http://www.gsea-msigdb.org/gsea/msigdb/cards/REACTOME_SIGNALING_BY_GPCR">http://www.gsea-msigdb.org/gsea/msigdb/cards/REACTOME_SIGNALING_BY_GPCR</a> |
| Positional_gene_sets | chr4q28                    | 58   | 10 | 4.46E-08 | 8.78E-07 | SPRY1:LINC01091:TECRP2:RP11-93I21.3:ANKRD50:FAT4:NUPL1P1:TMEM248P1:RBM48P1:SLC25A31                                                                                                                                                                                                                                                   | <a href="http://www.gsea-msigdb.org/gsea/msigdb/cards/chr4q28">http://www.gsea-msigdb.org/gsea/msigdb/cards/chr4q28</a>                                       |
| Positional_gene_sets | chr5q11                    | 74   | 11 | 4.70E-08 | 8.78E-07 | MIER3:SALL4P1:ACTBL2:RP11-478P10.1:PGAM1P1:PLK2:GAPT:MI R548AE2:CTD-2117L12.1:RAB3C:RPL5P15                                                                                                                                                                                                                                           | <a href="http://www.gsea-msigdb.org/gsea/msigdb/cards/chr5q11">http://www.gsea-msigdb.org/gsea/msigdb/cards/chr5q11</a>                                       |
| Positional_gene_sets | chr6p25                    | 61   | 10 | 7.36E-08 | 1.29E-06 | LYRM4:MIR3691:FARS2:PKMP5:F13A1:MIR5683:LY86-AS1:SNAPC5P1:CNN3P1:LY86                                                                                                                                                                                                                                                                 | <a href="http://www.gsea-msigdb.org/gsea/msigdb/cards/chr6p25">http://www.gsea-msigdb.org/gsea/msigdb/cards/chr6p25</a>                                       |
| GWAScatalog          | C-reactive protein         | 31   | 9  | 1.54E-09 | 1.40E-06 | IFI16:DARC:FCER1A:OR10J3:OR10J1:OR10J5:CRPP1:CRP:DUSP23                                                                                                                                                                                                                                                                               |                                                                                                                                                               |

|                      |                                  |      |    |          |          |                                                                                                                                                                                                                                                                                                                                                                        |                                                                                                                                                                           |
|----------------------|----------------------------------|------|----|----------|----------|------------------------------------------------------------------------------------------------------------------------------------------------------------------------------------------------------------------------------------------------------------------------------------------------------------------------------------------------------------------------|---------------------------------------------------------------------------------------------------------------------------------------------------------------------------|
| GO_mf                | GO_MOLECULAR_TRANSDUCER_ACTIVITY | 1518 | 57 | 1.99E-08 | 6.55E-06 | FCRL1:OR10T2:OR10K2:OR10R2:OR6Y1:OR6P1:OR10X1:OR10Z1:OR6K2:OR6K3:OR6K6:OR6N1:OR6N2:DARC:OR10J3:OR10J4:OR10J1:OR10J5:OR10J6P:RXRG:GPA33:CD247:HTR7:PRLHR:FGFR2:OR4A16:OR5W2:OR5I1:OR5F1:OR5AS1:OR8I2:OR8H2:OR8K5:OR5J2:OR8J2:OR8K3:OR8K1:OR5M11:OR5M10:OR5M1:OR5G3:OR5AK3P:OR5AK2:APLNR:OR5A1:OR4D6:OR4D10:OR4D11:GPR133:NTRK3:OR7A5:OR7A10:F2RL3:CXCR4:F2RL2:F2R:F2RL1 | <a href="http://www.gsea-msigdb.org/gsea/msigdb/cards/GO_MOLECULAR_TRANSDUCER_ACTIVITY">http://www.gsea-msigdb.org/gsea/msigdb/cards/GO_MOLECULAR_TRANSDUCER_ACTIVITY</a> |
| GO_bp                | GO_NERVOUS_SYSTEM_PROCESS        | 1409 | 55 | 9.74E-09 | 1.02E-05 | OR10T2:OR10K2:OR10R2:OR6Y1:OR6P1:OR10X1:OR10Z1:OR6K2:OR6K3:OR6K6:OR6N1:OR6N2:OR10J3:OR10J4:OR10J1:OR10J5:OR10J6P:LMX1A:OR4A16:OR5W2:OR5I1:OR5F1:OR5AS1:OR8I2:OR8H2:OR8K5:OR5J2:OR8J2:OR8K3:OR8K1:OR5M11:OR5M10:OR5M1:OR5G3:OR5AK3P:OR5AK2:TIMM10:OR5A1:OR4D6:OR4D10:OR4D11:DLG2:NTRK3:ADCYAP1:OR7A5:OR7A10:RAB3A:CRYBB1:CRYBA4:SOX14:PLK2:F2R:CRHBP:TFAP2A:EYS         | <a href="http://www.gsea-msigdb.org/gsea/msigdb/cards/GO_NERVOUS_SYSTEM_PROCESS">http://www.gsea-msigdb.org/gsea/msigdb/cards/GO_NERVOUS_SYSTEM_PROCESS</a>               |
| Positional_gene_sets | chr15q25                         | 135  | 12 | 3.42E-06 | 5.69E-05 | RNU6-1339P:RNU6-231P:MIR548AP:RP11-553E24.2:RNA5SP400:AGBL1:AGBL1-AS1:RNU6-185P:LINC00052:NTRK3:MED28P6:NTRK3-AS1                                                                                                                                                                                                                                                      | <a href="http://www.gsea-msigdb.org/gsea/msigdb/cards/chr15q25">http://www.gsea-msigdb.org/gsea/msigdb/cards/chr15q25</a>                                                 |

|                      |                                                  |     |    |          |          |                                                                                                                                                                                                                                                                       |                                                                                                                                                                                                           |
|----------------------|--------------------------------------------------|-----|----|----------|----------|-----------------------------------------------------------------------------------------------------------------------------------------------------------------------------------------------------------------------------------------------------------------------|-----------------------------------------------------------------------------------------------------------------------------------------------------------------------------------------------------------|
| Positional_gene_sets | chr2q22                                          | 39  | 7  | 3.67E-06 | 5.77E-05 | <i>CXCR4:HNMT:AC069394.1:YWHAEP5:SPOPL:NXPB2:RN7SL283P</i>                                                                                                                                                                                                            | <a href="http://www.gsea-msigdb.org/gsea/msigdb/cards/chr2q22">http://www.gsea-msigdb.org/gsea/msigdb/cards/chr2q22</a>                                                                                   |
| Positional_gene_sets | chr19p13                                         | 706 | 30 | 4.81E-06 | 7.20E-05 | <i>SNORD37:SNORA68:SNORD37:SNORA68:SNORD37:OR7A5:OR7A10:MED26:SIN3B:F2RL3:RN7SL835P:RN7SL823P:ANO8:GTPBP3:TMEM221:SLC27A1:PGLS:FAM129C:COLGALT1:UNC13A:MAP1S:FCHO1:INSL3:JAK3:RPL18A:SNORA68:SLC5A5:CCDC124:KCNN1:ARRDC2:IFI30:MPV17L2:RAB3A:KXD1:SNORA68:SNORA68</i> | <a href="http://www.gsea-msigdb.org/gsea/msigdb/cards/chr19p13">http://www.gsea-msigdb.org/gsea/msigdb/cards/chr19p13</a>                                                                                 |
| GO_mf                | GO_THROMBIN_ACTIVATED_RECEPTOR_ACTIVITY          | 5   | 4  | 3.99E-07 | 9.38E-05 | <i>F2RL3:F2RL2:F2R:F2RL1</i>                                                                                                                                                                                                                                          | <a href="http://www.gsea-msigdb.org/gsea/msigdb/cards/GO_THROMBIN_ACTIVATED_RECEPTOR_ACTIVITY">http://www.gsea-msigdb.org/gsea/msigdb/cards/GO_THROMBIN_ACTIVATED_RECEPTOR_ACTIVITY</a>                   |
| GO_mf                | GO_GLYCINE_N_ACYLTRANSFERASE_ACTIVITY            | 5   | 4  | 3.99E-07 | 9.38E-05 | <i>GLYAT:GLYATL2:GLYATL1:GLYATL1P3</i>                                                                                                                                                                                                                                | <a href="http://www.gsea-msigdb.org/gsea/msigdb/cards/GO_GLYCINE_N_ACYLTRANSFERASE_ACTIVITY">http://www.gsea-msigdb.org/gsea/msigdb/cards/GO_GLYCINE_N_ACYLTRANSFERASE_ACTIVITY</a>                       |
| Positional_gene_sets | chr6q12                                          | 19  | 5  | 1.30E-05 | 0.000185 | <i>RNU6-1221P:EYS:GCNT1P4:ADH5P4:RNU6-280P:RP11-406O16.1</i>                                                                                                                                                                                                          | <a href="http://www.gsea-msigdb.org/gsea/msigdb/cards/chr6q12">http://www.gsea-msigdb.org/gsea/msigdb/cards/chr6q12</a>                                                                                   |
| GO_bp                | GO_THROMBIN_ACTIVATED_RECEPTOR_SIGNALING_PATHWAY | 12  | 5  | 9.76E-07 | 0.000896 | <i>F2RL3:IQGAP2:F2RL2:F2R:F2RL1</i>                                                                                                                                                                                                                                   | <a href="http://www.gsea-msigdb.org/gsea/msigdb/cards/GO_THROMBIN_ACTIVATED_RECEPTOR_SIGNALING_PATHWAY">http://www.gsea-msigdb.org/gsea/msigdb/cards/GO_THROMBIN_ACTIVATED_RECEPTOR_SIGNALING_PATHWAY</a> |
| GWAScatalog          | Select biomarker traits                          | 14  | 5  | 2.40E-06 | 0.001451 | <i>CADM3:FCER1A:OR10J3:OR10J1:CRP</i>                                                                                                                                                                                                                                 |                                                                                                                                                                                                           |

|                      |                                                 |     |    |          |          |                                                                                                              |                                                                                                                                                                                               |
|----------------------|-------------------------------------------------|-----|----|----------|----------|--------------------------------------------------------------------------------------------------------------|-----------------------------------------------------------------------------------------------------------------------------------------------------------------------------------------------|
| Positional_gene_sets | chr10q23                                        | 169 | 11 | 0.000154 | 0.002086 | ACTA2-<br>AS1:LIPA:PANK1:KIF20B:LINC00865:<br>RP11-<br>478K7.2:SNRPD2P1:RN7SKP143:RP1<br>1-15K3.1:HTR7:RPP30 | <a href="http://www.gsea-msigdb.org/gsea/msigdb/cards/chr10q23">http://www.gsea-<br/>msigdb.org/gsea/msigdb/<br/>cards/chr10q23</a>                                                           |
| GWAScatalog          | Obesity (extreme)<br>(SNP x SNP<br>interaction) | 3   | 3  | 4.81E-06 | 0.002182 | OR10R1P:OR6Y1:OR6P1                                                                                          |                                                                                                                                                                                               |
| Positional_gene_sets | chr18q22                                        | 51  | 6  | 0.000215 | 0.002796 | DSEL:RP11-<br>638L3.3:AKR1B10P2:TMX3:CCDC10<br>2B:RPS2P6                                                     | <a href="http://www.gsea-msigdb.org/gsea/msigdb/cards/chr18q22">http://www.gsea-<br/>msigdb.org/gsea/msigdb/<br/>cards/chr18q22</a>                                                           |
| Positional_gene_sets | chr8q23                                         | 34  | 5  | 0.000252 | 0.00314  | RP11-<br>946L20.4:EEF1A1P37:CSMD3:RPL30<br>P16:MIR2053                                                       | <a href="http://www.gsea-msigdb.org/gsea/msigdb/cards/chr8q23">http://www.gsea-<br/>msigdb.org/gsea/msigdb/<br/>cards/chr8q23</a>                                                             |
| Hallmark_gene_sets   | HALLMARK_BILE_AC<br>ID_METABOLISM               | 112 | 9  | 0.000125 | 0.006237 | RXRG:ALDH9A1:IDI1:PXMP2:ABCA8:<br>ABCA9:ABCA6:ABCA5:BMP6                                                     | <a href="http://www.gsea-msigdb.org/gsea/msigdb/cards/HALLMARK_BILE_A&lt;br/&gt;CID_METABOLISM">http://www.gsea-<br/>msigdb.org/gsea/msigdb/<br/>cards/HALLMARK_BILE_A<br/>CID_METABOLISM</a> |
| Positional_gene_sets | chr14q12                                        | 86  | 7  | 0.000647 | 0.007737 | OR7K1P:RP11-626P14.2:RP11-<br>384J4.1:MIR4307:BNIP3P1:RPL26P3<br>:EIF4A1P12                                  | <a href="http://www.gsea-msigdb.org/gsea/msigdb/cards/chr14q12">http://www.gsea-<br/>msigdb.org/gsea/msigdb/<br/>cards/chr14q12</a>                                                           |
| Wikipathways         | Amino acid<br>conjugation of<br>benzoic acid    | 4   | 3  | 1.90E-05 | 0.010315 | GLYAT:GLYATL2:GLYATL1                                                                                        | <a href="http://www.wikipathways.org/instance/WP521_r106159">http://www.wikipathways<br/>.org/instance/WP521_r10<br/>6159</a>                                                                 |
| Positional_gene_sets | chr4q27                                         | 27  | 4  | 0.001042 | 0.011988 | IL21:IL21-AS1:CETN4P:BBS12                                                                                   | <a href="http://www.gsea-msigdb.org/gsea/msigdb/cards/chr4q27">http://www.gsea-<br/>msigdb.org/gsea/msigdb/<br/>cards/chr4q27</a>                                                             |

|                      |                                               |     |    |          |          |                                                                                                                                                                 |                                                                                                                                                                                                     |
|----------------------|-----------------------------------------------|-----|----|----------|----------|-----------------------------------------------------------------------------------------------------------------------------------------------------------------|-----------------------------------------------------------------------------------------------------------------------------------------------------------------------------------------------------|
| GWAScatalog          | Night sleep phenotypes                        | 532 | 23 | 4.68E-05 | 0.016972 | OR6P1:OR10X1:OR10Z1:SPTA1:PBX1:PXMP2:MIR1179:MIR7-2:DSEL:RP11-638L3.1:RPS2P6:RPL21P17:CNTN4:IL21:IL21-AS1:CETN4P:BBS12:SALL4P1:ACTBL2:PKMP5:F13A1:MIR5683:OFCC1 |                                                                                                                                                                                                     |
| Positional_gene_sets | chr11q22                                      | 80  | 6  | 0.002378 | 0.026335 | RPS2P39:C11orf87:TFAMP2:ZC3H12C:RDX:FDX1                                                                                                                        | <a href="http://www.gsea-msigdb.org/gsea/msigdb/cards/chr11q22">http://www.gsea-msigdb.org/gsea/msigdb/cards/chr11q22</a>                                                                           |
| GWAScatalog          | Breast cancer in BRCA2 mutation carriers      | 6   | 3  | 9.26E-05 | 0.028013 | FGFR2:TFAP2A:LINC00518                                                                                                                                          |                                                                                                                                                                                                     |
| Positional_gene_sets | chr11q23                                      | 174 | 9  | 0.002963 | 0.03164  | ARHGAP20:RP11-89C3.4:RPS17P15:C11orf53:MIR4491:POU2AF1:RNU2-60P:LAYN:PPP2R1B                                                                                    | <a href="http://www.gsea-msigdb.org/gsea/msigdb/cards/chr11q23">http://www.gsea-msigdb.org/gsea/msigdb/cards/chr11q23</a>                                                                           |
| Reactome             | REACTOME_CONJUGATION_OF_BENZOATE_WITH_GLYCINE | 6   | 3  | 9.26E-05 | 0.034703 | GLYAT:GLYATL2:GLYATL1                                                                                                                                           | <a href="http://www.gsea-msigdb.org/gsea/msigdb/cards/REACTOME_CONJUGATION_OF_BENZOATE_WITH_GLYCINE">http://www.gsea-msigdb.org/gsea/msigdb/cards/REACTOME_CONJUGATION_OF_BENZOATE_WITH_GLYCINE</a> |
| Canonical_Pathways   | REACTOME_CONJUGATION_OF_BENZOATE_WITH_GLYCINE | 6   | 3  | 9.26E-05 | 0.040727 | GLYAT:GLYATL2:GLYATL1                                                                                                                                           | <a href="http://www.gsea-msigdb.org/gsea/msigdb/cards/REACTOME_CONJUGATION_OF_BENZOATE_WITH_GLYCINE">http://www.gsea-msigdb.org/gsea/msigdb/cards/REACTOME_CONJUGATION_OF_BENZOATE_WITH_GLYCINE</a> |

**Supplementary Table 7.** External replication with Wooton at al's top sequence variants associated with social trust. 44 variants were available in our dataset and are shown below.

| RS         | Gene                | ALLELE1 | ALLELE0 | A1FREQ | BETA Wootton | P Wootton | BETA DBDS | P DBDS  |
|------------|---------------------|---------|---------|--------|--------------|-----------|-----------|---------|
| rs1018991  | <i>CNTNAP2</i>      | G       | A       | 0.1177 | -0.72        | 4.22E-06  | 0.0455    | 0.03543 |
| rs10228191 | <i>CNTNAP2</i>      | T       | C       | 0.1093 | -0.73        | 5.25E-06  | 0.0387    | 0.08232 |
| rs10264424 | <i>CNTNAP2</i>      | A       | G       | 0.1099 | 0.73         | 5.41E-06  | 0.0384    | 0.08426 |
| rs10265626 | <i>CNTNAP2</i>      | A       | C       | 0.1074 | 0.72         | 7.17E-06  | 0.0432    | 0.05404 |
| rs10267232 | <i>CNTNAP2</i>      | T       | C       | 0.1175 | -0.73        | 3.55E-06  | 0.0452    | 0.03666 |
| rs1528532  | <i>CNTNAP2</i>      | T       | C       | 0.1098 | -0.79        | 5.79E-06  | 0.0386    | 0.08295 |
| rs6464815  | <i>CNTNAP2</i>      | T       | C       | 0.1343 | -0.71        | 3.55E-06  | 0.0463    | 0.02324 |
| rs6973129  | <i>CNTNAP2</i>      | A       | C       | 0.1177 | 0.71         | 6.24E-06  | 0.0438    | 0.04245 |
| rs700313   | <i>CNTNAP2</i>      | A       | C       | 0.1107 | 0.71         | 9.09E-06  | 0.0387    | 0.08048 |
| rs7778880  | <i>CNTNAP2</i>      | A       | G       | 0.1165 | 0.71         | 6.56E-06  | 0.046     | 0.03351 |
| rs7779464  | <i>CNTNAP2</i>      | A       | G       | 0.1165 | 0.71         | 6.40E-06  | 0.046     | 0.03355 |
| rs826647   | <i>CNTNAP2</i>      | A       | G       | 0.1092 | 0.73         | 4.71E-06  | 0.039     | 0.0798  |
| rs826650   | <i>CNTNAP2</i>      | G       | A       | 0.1092 | -0.73        | 4.64E-06  | 0.0392    | 0.07877 |
| rs826651   | <i>CNTNAP2</i>      | T       | C       | 0.1092 | -0.73        | 4.37E-06  | 0.0391    | 0.07914 |
| rs826655   | <i>CNTNAP2</i>      | T       | C       | 0.1104 | -0.7         | 1.03E-05  | 0.0397    | 0.07307 |
| rs826656   | <i>CNTNAP2</i>      | T       | C       | 0.1107 | -0.71        | 8.07E-06  | 0.0385    | 0.08221 |
| rs826657   | <i>CNTNAP2</i>      | T       | C       | 0.1107 | -0.71        | 1.03E-05  | 0.0386    | 0.08118 |
| rs826658   | <i>CNTNAP2</i>      | C       | T       | 0.1107 | 0.71         | 8.15E-06  | 0.0385    | 0.08198 |
| rs826659   | <i>CNTNAP2</i>      | T       | C       | 0.1107 | -0.71        | 8.17E-06  | 0.0386    | 0.08162 |
| rs826661   | <i>CNTNAP2</i>      | C       | T       | 0.1107 | 0.71         | 8.27E-06  | 0.0386    | 0.08157 |
| rs10170802 | <i>GCFC2;LRRTM4</i> | C       | T       | 0.0693 | 1.1          | 3.88E-06  | -0.0143   | 0.5975  |
| rs12473082 | <i>GCFC2;LRRTM4</i> | T       | G       | 0.0689 | -1.06        | 7.79E-06  | -0.0182   | 0.5005  |
| rs1372007  | <i>GCFC2;LRRTM4</i> | G       | T       | 0.0692 | 1.14         | 2.85E-06  | -0.0143   | 0.5973  |
| rs1404089  | <i>GCFC2;LRRTM4</i> | G       | C       | 0.0692 | -1.14        | 2.85E-06  | -0.0143   | 0.5972  |
| rs1524214  | <i>GCFC2;LRRTM4</i> | C       | A       | 0.0692 | -1.14        | 2.85E-06  | -0.0143   | 0.5972  |
| rs1524216  | <i>GCFC2;LRRTM4</i> | A       | C       | 0.0687 | 1.15         | 1.75E-06  | -0.0203   | 0.4549  |
| rs1608588  | <i>GCFC2;LRRTM4</i> | T       | C       | 0.0688 | -1.14        | 2.85E-06  | -0.0158   | 0.5594  |
| rs1660568  | <i>GCFC2;LRRTM4</i> | T       | C       | 0.0687 | -1.08        | 6.22E-06  | -0.0158   | 0.5596  |



|            |                            |   |   |        |       |          |         |         |
|------------|----------------------------|---|---|--------|-------|----------|---------|---------|
| rs2140571  | <i>GCFC2;LRRTM4</i>        | C | T | 0.0688 | 1.16  | 1.58E-06 | -0.0205 | 0.4494  |
| rs2901742  | <i>GCFC2;LRRTM4</i>        | G | T | 0.0691 | 1.1   | 3.94E-06 | -0.0134 | 0.6193  |
| rs317288   | <i>GCFC2;LRRTM4</i>        | A | G | 0.0687 | 1.14  | 2.90E-06 | -0.0156 | 0.5653  |
| rs317290   | <i>GCFC2;LRRTM4</i>        | G | T | 0.0691 | 1.13  | 2.84E-06 | -0.0133 | 0.6232  |
| rs425915   | <i>GCFC2;LRRTM4</i>        | C | T | 0.0691 | 1.14  | 2.59E-06 | -0.0132 | 0.6256  |
| rs449418   | <i>GCFC2;LRRTM4</i>        | G | A | 0.0691 | -1.13 | 2.60E-06 | -0.0134 | 0.6194  |
| rs6753413  | <i>GCFC2;LRRTM4</i>        | T | C | 0.0689 | -1.14 | 2.85E-06 | -0.0145 | 0.5933  |
| rs6759874  | <i>GCFC2;LRRTM4</i>        | T | C | 0.0693 | -1.14 | 2.66E-06 | -0.0125 | 0.6433  |
| rs7321687  | <i>GPC6</i>                | T | G | 0.3159 | -0.51 | 7.17E-06 | -0.0024 | 0.8734  |
| rs9516371  | <i>GPC6</i>                | T | C | 0.341  | -0.48 | 1.03E-05 | -0.0024 | 0.8709  |
| rs4145891  | <i>LINC00540;LINC0062A</i> | A | T | 0.1306 | 0.67  | 6.83E-06 | 0.0024  | 0.9115  |
| rs10824657 | <i>LINC00595;ZMIZ1-AS1</i> | A | G | 0.2135 | -0.6  | 1.06E-06 | 0.0079  | 0.6407  |
| rs10501366 | <i>LRRC55;APLNR</i>        | A | G | 0.2799 | 0.54  | 9.74E-06 | 0.0029  | 0.8535  |
| rs2239879  | <i>MTMR7</i>               | C | T | 0.3299 | 0.52  | 7.02E-06 | 0.012   | 0.417   |
| rs7005753  | <i>MTMR7</i>               | G | T | 0.3467 | 0.5   | 6.81E-06 | 0.0132  | 0.3679  |
| rs12700790 | <i>SDK1</i>                | A | G | 0.0888 | 0.8   | 6.76E-06 | -0.0415 | 0.08639 |

**Supplementary Table 8.** Studies used for computing genetic correlation with social trust. Summary statistics for 14 psychiatric phenotypes were obtained from the Psychiatric Genomics Consortium resource; those for 5 personality traits were obtained from the corresponding publications.

| Phenotype                           | Reference                                                                                                         | Summary statistics                                                                                                        | Sample size | Acronym |
|-------------------------------------|-------------------------------------------------------------------------------------------------------------------|---------------------------------------------------------------------------------------------------------------------------|-------------|---------|
| ADHD                                | <a href="https://pubmed.ncbi.nlm.nih.gov/30478444/">https://pubmed.ncbi.nlm.nih.gov/30478444/</a>                 | <a href="https://pgc.unc.edu/for-researchers/download-results/">https://pgc.unc.edu/for-researchers/download-results/</a> | 55374       | ADHD    |
| Alcohol dependence                  | <a href="https://pubmed.ncbi.nlm.nih.gov/30482948/">https://pubmed.ncbi.nlm.nih.gov/30482948/</a>                 | <a href="https://pgc.unc.edu/for-researchers/download-results/">https://pgc.unc.edu/for-researchers/download-results/</a> | 46568       | AUD     |
| Alzheimers disease                  | <a href="https://pubmed.ncbi.nlm.nih.gov/30617256/">https://pubmed.ncbi.nlm.nih.gov/30617256/</a>                 | <a href="https://pgc.unc.edu/for-researchers/download-results/">https://pgc.unc.edu/for-researchers/download-results/</a> | 455258      | AD      |
| Anorexia nervosa                    | <a href="https://pubmed.ncbi.nlm.nih.gov/31308545/">https://pubmed.ncbi.nlm.nih.gov/31308545/</a>                 | <a href="https://pgc.unc.edu/for-researchers/download-results/">https://pgc.unc.edu/for-researchers/download-results/</a> | 72517       | AN      |
| Anxiety disorders<br>(factor score) | <a href="https://pubmed.ncbi.nlm.nih.gov/26754954/">https://pubmed.ncbi.nlm.nih.gov/26754954/</a>                 | <a href="https://pgc.unc.edu/for-researchers/download-results/">https://pgc.unc.edu/for-researchers/download-results/</a> | 18186       | ANX     |
| Autism spectrum<br>disorder         | <a href="https://pubmed.ncbi.nlm.nih.gov/30804558/">https://pubmed.ncbi.nlm.nih.gov/30804558/</a>                 | <a href="https://pgc.unc.edu/for-researchers/download-results/">https://pgc.unc.edu/for-researchers/download-results/</a> | 46350       | ASD     |
| Bipolar disorder                    | <a href="https://pubmed.ncbi.nlm.nih.gov/34002096/">https://pubmed.ncbi.nlm.nih.gov/34002096/</a>                 | <a href="https://pgc.unc.edu/for-researchers/download-results/">https://pgc.unc.edu/for-researchers/download-results/</a> | 413466      | BIP     |
| Depressive symptoms                 | <a href="https://www.nature.com/articles/s41588-018-0320-9">https://www.nature.com/articles/s41588-018-0320-9</a> | <a href="https://pgc.unc.edu/for-researchers/download-results/">https://pgc.unc.edu/for-researchers/download-results/</a> | 1067913     | DEP     |
| Major depressive<br>disorder        | <a href="https://pubmed.ncbi.nlm.nih.gov/29700475/">https://pubmed.ncbi.nlm.nih.gov/29700475/</a>                 | <a href="https://pgc.unc.edu/for-researchers/download-results/">https://pgc.unc.edu/for-researchers/download-results/</a> | 480359      | MDD     |
| OCD                                 | <a href="https://pubmed.ncbi.nlm.nih.gov/28761083/">https://pubmed.ncbi.nlm.nih.gov/28761083/</a>                 | <a href="https://pgc.unc.edu/for-researchers/download-results/">https://pgc.unc.edu/for-researchers/download-results/</a> | 9725        | OCD     |
| PTSD                                | <a href="https://pubmed.ncbi.nlm.nih.gov/31594949/">https://pubmed.ncbi.nlm.nih.gov/31594949/</a>                 | <a href="https://pgc.unc.edu/for-researchers/download-results/">https://pgc.unc.edu/for-researchers/download-results/</a> | 206655      | PTSD    |
| Schizophrenia                       | <a href="https://pubmed.ncbi.nlm.nih.gov/35396580/">https://pubmed.ncbi.nlm.nih.gov/35396580/</a>                 | <a href="https://pgc.unc.edu/for-researchers/download-results/">https://pgc.unc.edu/for-researchers/download-results/</a> | 320404      | SCZ     |
| Tourette's syndrome                 | <a href="https://pubmed.ncbi.nlm.nih.gov/30818990/">https://pubmed.ncbi.nlm.nih.gov/30818990/</a>                 | <a href="https://pgc.unc.edu/for-researchers/download-results/">https://pgc.unc.edu/for-researchers/download-results/</a> | 14307       | TS      |

|                   |                                                                                                                   |                                                                                                                                                                                                                                                                                                                                 |            |
|-------------------|-------------------------------------------------------------------------------------------------------------------|---------------------------------------------------------------------------------------------------------------------------------------------------------------------------------------------------------------------------------------------------------------------------------------------------------------------------------|------------|
| Neuroticism       | <a href="https://www.nature.com/articles/s41588-018-0320-8">https://www.nature.com/articles/s41588-018-0320-8</a> | <a href="https://surfdrive.surf.nl/files/index.php/s/Ow1qCDpFT421ZOO/download?path=%2FMultivariate_GWAMA_sumstats%2FUnivariate&amp;files=Uni_NEU_no23andMe.txt.gz">https://surfdrive.surf.nl/files/index.php/s/Ow1qCDpFT421ZOO/download?path=%2FMultivariate_GWAMA_sumstats%2FUnivariate&amp;files=Uni_NEU_no23andMe.txt.gz</a> | 523783 NEU |
| Openness          | <a href="https://www.nature.com/articles/mp2010128#Sec29">https://www.nature.com/articles/mp2010128#Sec29</a>     | <a href="https://tweelingenregister.vu.nl/gpc">https://tweelingenregister.vu.nl/gpc</a>                                                                                                                                                                                                                                         | 17375 OPN  |
| Extraversion      | <a href="https://www.nature.com/articles/mp2010128#Sec29">https://www.nature.com/articles/mp2010128#Sec29</a>     | <a href="https://tweelingenregister.vu.nl/gpc">https://tweelingenregister.vu.nl/gpc</a>                                                                                                                                                                                                                                         | 17375 EXTR |
| Conscientiousness | <a href="https://www.nature.com/articles/mp2010128#Sec29">https://www.nature.com/articles/mp2010128#Sec29</a>     | <a href="https://tweelingenregister.vu.nl/gpc">https://tweelingenregister.vu.nl/gpc</a>                                                                                                                                                                                                                                         | 17375 CONS |
| Agreeableness     | <a href="https://www.nature.com/articles/mp2010128#Sec29">https://www.nature.com/articles/mp2010128#Sec29</a>     | <a href="https://tweelingenregister.vu.nl/gpc">https://tweelingenregister.vu.nl/gpc</a>                                                                                                                                                                                                                                         | 17375 AGR  |

**Supplementary Table 9.** Full table of PheWAS associations between discovery lead sequence variant, rs12776883, and phenotypes found in the GWAS ATLAS resource (<https://atlas.ctglab.nl/>). Associations are sorted by Bonferroni-corrected p-value.

| atlas |          |      |               |                                                                |          |       |       |    |     |                                                                                                                                                                                                                                                                         |            |                 |
|-------|----------|------|---------------|----------------------------------------------------------------|----------|-------|-------|----|-----|-------------------------------------------------------------------------------------------------------------------------------------------------------------------------------------------------------------------------------------------------------------------------|------------|-----------------|
| ID    | PMID     | Year | Domain        | Trait                                                          | P-value  | P-adj | N     | EA | NEA | File                                                                                                                                                                                                                                                                    | Consortium | Population      |
| 4553  | 31676860 | 2019 | Neurological  | Left isthmus cingulate                                         | 6.72E-04 | 0.06  | 21821 | T  | C   | <a href="https://www.med.unc.edu/bigs2/data/gwas-summary-statistics/">https://www.med.unc.edu/bigs2/data/gwas-summary-statistics/</a>                                                                                                                                   | NA         | UKB2 (EUR meta) |
| 4452  | 31676860 | 2019 | Neurological  | Left isthmus cingulate                                         | 8.42E-04 | 0.076 | 19629 | T  | C   | <a href="https://www.med.unc.edu/bigs2/data/gwas-summary-statistics/">https://www.med.unc.edu/bigs2/data/gwas-summary-statistics/</a>                                                                                                                                   | NA         | UKB2 (EUR)      |
| 999   | 27989323 | 2017 | Immunological | Monocyte specific chemokine 3 (CCL7)                           | 9.64E-04 | 0.087 | 843   | C  | T   | <a href="http://www.computationalmedicine.fi/data#Cytokine_GWAS">http://www.computationalmedicine.fi/data#Cytokine_GWAS</a>                                                                                                                                             | NA         | EUR             |
| 397   | 24816252 | 2014 | Metabolic     | Amino acid::Phenylalanine & tyrosine metabolism::phenylacetate | 0.00282  | 0.254 | 4754  | T  | C   | <a href="http://mips.helmholtz-muenchen.de/proj/GWAS/gwas/gwas_server/shin_et_al.metal.out.tar.gz">http://mips.helmholtz-muenchen.de/proj/GWAS/gwas/gwas_server/shin_et_al.metal.out.tar.gz</a>                                                                         | NA         | EUR             |
| 1225  | 25607358 | 2015 | Neurological  | Mean Thalamus                                                  | 0.00377  | 0.339 | 13171 | T  | C   | <a href="http://enigma.ini.usc.edu/research/download-enigma-gwas-results/">http://enigma.ini.usc.edu/research/download-enigma-gwas-results/</a>                                                                                                                         | ENIGMA     | EUR             |
| 4255  | 30952852 | 2019 | Psychiatric   | Sleep efficiency                                               | 0.0039   | 0.351 | 84810 | C  | T   | <a href="https://personal.broadinstitute.org/mvon/accel_GWAS_all_BOLT_output_HRC.only_plus_metrics_maf0.001_hwep1em12_info0.3.txt.zip">https://personal.broadinstitute.org/mvon/accel_GWAS_all_BOLT_output_HRC.only_plus_metrics_maf0.001_hwep1em12_info0.3.txt.zip</a> | NA         | UKB2 (EUR)      |
| 336   | 25772697 | 2015 | Immunological | NKeff:%2-158a+                                                 | 0.00398  | 0.358 | 669   | T  | C   | <a href="ftp://twinkl.kcl.ac.uk/ImmuneCellScience/2-GWASResults/GWA_P4_3553.txt.gz">ftp://twinkl.kcl.ac.uk/ImmuneCellScience/2-GWASResults/GWA_P4_3553.txt.gz</a>                                                                                                       | NA         | EUR             |

|      |          |      |               |                                                                                                                                                  |         |       |        |   |   |                                                                                                                                                                                                                                                                                                         |     |                 |
|------|----------|------|---------------|--------------------------------------------------------------------------------------------------------------------------------------------------|---------|-------|--------|---|---|---------------------------------------------------------------------------------------------------------------------------------------------------------------------------------------------------------------------------------------------------------------------------------------------------------|-----|-----------------|
| 3241 | 31427789 | 2019 | Nutritional   | Salad / raw vegetable intake                                                                                                                     | 0.00483 | 0.435 | 363780 | T | C | <a href="https://atlas.ctglab.nl/ukb2_sumstats/f.1299.0.0_res.EUR.sumstats.MACfilt.txt.gz">https://atlas.ctglab.nl/ukb2_sumstats/f.1299.0.0_res.EUR.sumstats.MACfilt.txt.gz</a>                                                                                                                         | NA  | UKB2 (EUR)      |
| 3539 | 31427789 | 2019 | Activities    | Reason for glasses/contact lenses: For short-sightedness, i.e. only or mainly for distance viewing such as driving, cinema etc (called 'myopia') | 0.00533 | 0.48  | 78647  | C | T | <a href="https://atlas.ctglab.nl/ukb2_sumstats/6147_1_logistic.EUR.sumstats.MACfilt.txt.gz">https://atlas.ctglab.nl/ukb2_sumstats/6147_1_logistic.EUR.sumstats.MACfilt.txt.gz</a>                                                                                                                       | NA  | UKB2 (EUR)      |
| 4014 | 29700475 | 2018 | Psychiatric   | Major depressive disorder                                                                                                                        | 0.00581 | 0.523 | 173005 | T | C | <a href="https://www.med.unc.edu/pgc/results-and-downloads/downloads">https://www.med.unc.edu/pgc/results-and-downloads/downloads</a>                                                                                                                                                                   | PGC | UKB1 (EUR meta) |
| 334  | 25772697 | 2015 | Immunological | NKeff:%Kir (1)                                                                                                                                   | 0.00628 | 0.565 | 669    | T | C | <a href="ftp://twinr-ftp.kcl.ac.uk/ImmuneCellScience/2-GWASResults/GWA_P4_3546.txt.gz">ftp://twinr-ftp.kcl.ac.uk/ImmuneCellScience/2-GWASResults/GWA_P4_3546.txt.gz</a>                                                                                                                                 | NA  | EUR             |
| 4280 | 30804560 | 2019 | Respiratory   | FEV1/FVC ratio                                                                                                                                   | 0.00671 | 0.604 | 400102 | C | T | <a href="ftp://ftp.ebi.ac.uk/pub/databases/gwas/summary_statistics/ShrineN_30804560_GCST007431/Shrine_30804560_FEV1_to_FVC_RATIO_meta-analysis.txt.gz">ftp://ftp.ebi.ac.uk/pub/databases/gwas/summary_statistics/ShrineN_30804560_GCST007431/Shrine_30804560_FEV1_to_FVC_RATIO_meta-analysis.txt.gz</a> | NA  | UKB2 (EUR meta) |
| 338  | 25772697 | 2015 | Immunological | NKeff:%Kir+ (3)                                                                                                                                  | 0.00709 | 0.638 | 669    | T | C | <a href="ftp://twinr-ftp.kcl.ac.uk/ImmuneCellScience/2-GWASResults/GWA_P4_3763.txt.gz">ftp://twinr-ftp.kcl.ac.uk/ImmuneCellScience/2-GWASResults/GWA_P4_3763.txt.gz</a>                                                                                                                                 | NA  | EUR             |
| 4586 | 31676860 | 2019 | Neurological  | Right lateral orbitofrontal                                                                                                                      | 0.00832 | 0.749 | 21821  | T | C | <a href="https://www.med.unc.edu/big2/data/gwas-summary-statistics/">https://www.med.unc.edu/big2/data/gwas-summary-statistics/</a>                                                                                                                                                                     | NA  | UKB2 (EUR meta) |

|      |          |      |               |                                                                                                                                                   |         |       |        |    |    |                                                                                                                                                                                                                                                                                                                                              |    |                 |
|------|----------|------|---------------|---------------------------------------------------------------------------------------------------------------------------------------------------|---------|-------|--------|----|----|----------------------------------------------------------------------------------------------------------------------------------------------------------------------------------------------------------------------------------------------------------------------------------------------------------------------------------------------|----|-----------------|
| 337  | 25772697 | 2015 | Immunological | NKeff:%Kir+ (2)<br>Reason for<br>glasses/contact<br>lenses: For just<br>reading/near work<br>as you are getting<br>older (called<br>'presbyopia') | 0.00895 | 0.806 | 669    | C  | T  | <a href="ftp://twinn-ftp.kcl.ac.uk/ImmuneCellScience/2-GWASResults/GWA_P4_3636.txt.gz">ftp://twinn-ftp.kcl.ac.uk/ImmuneCellScience/2-GWASResults/GWA_P4_3636.txt.gz</a>                                                                                                                                                                      | NA | EUR             |
| 3541 | 31427789 | 2019 | Activities    | CD4:CD8<br>lymphocyte ratio                                                                                                                       | 0.00947 | 0.853 | 78647  | T  | C  | <a href="https://atlas.ctglab.nl/ukb2_sumstats/6147_3_logistic.EUR.sumstats.MACfilt.txt.gz">https://atlas.ctglab.nl/ukb2_sumstats/6147_3_logistic.EUR.sumstats.MACfilt.txt.gz</a><br><a href="https://genepi.qimr.edu.au/staff/manuelF/gwas_results/CD4_8.assoc.gz">https://genepi.qimr.edu.au/staff/manuelF/gwas_results/CD4_8.assoc.gz</a> | NA | UKB2 (EUR)      |
| 3815 | 20045101 | 2010 | Immunological | Depression<br>Monokine induced<br>by interferon-<br>gamma (CXCL9)                                                                                 | 0.0112  | 1     | 2538   | NA | NA | <a href="https://datashare.is.ed.ac.uk/bitstream/handle/10283/3203/PGC_UKB_depression_genome-wide.txt">https://datashare.is.ed.ac.uk/bitstream/handle/10283/3203/PGC_UKB_depression_genome-wide.txt</a>                                                                                                                                      | NA | EUR             |
| 4293 | 30718901 | 2019 | Psychiatric   | Peptide::Dipeptide::<br>cyclo(leu-pro)<br>Amino<br>acid::Phenylalanine<br>& tyrosine<br>metabolism::phenyll<br>actate (PLA)                       | 0.01175 | 1     | 500199 | T  | C  | <a href="http://www.computationalmedicine.fi/data#Cytokine_GWAS">http://www.computationalmedicine.fi/data#Cytokine_GWAS</a><br><a href="http://mips.helmholtz-muenchen.de/proj/GWAS/gwas/gwas_server/shin_et_al.metal.out.tar.gz">http://mips.helmholtz-muenchen.de/proj/GWAS/gwas/gwas_server/shin_et_al.metal.out.tar.gz</a>               | NA | UKB2 (EUR meta) |
| 1002 | 27989323 | 2017 | Immunological |                                                                                                                                                   | 0.01191 | 1     | 3685   | T  | C  | <a href="http://mips.helmholtz-muenchen.de/proj/GWAS/gwas/gwas_server/shin_et_al.metal.out.tar.gz">http://mips.helmholtz-muenchen.de/proj/GWAS/gwas/gwas_server/shin_et_al.metal.out.tar.gz</a>                                                                                                                                              | NA | EUR             |
| 592  | 24816252 | 2014 | Metabolic     |                                                                                                                                                   | 0.01198 | 1     | 4833   | C  | T  |                                                                                                                                                                                                                                                                                                                                              | NA | EUR             |
| 400  | 24816252 | 2014 | Metabolic     |                                                                                                                                                   | 0.01265 | 1     | 6064   | C  | T  | <a href="http://mips.helmholtz-muenchen.de/proj/GWAS/gwas/gwas_server/shin_et_al.metal.out.tar.gz">http://mips.helmholtz-muenchen.de/proj/GWAS/gwas/gwas_server/shin_et_al.metal.out.tar.gz</a>                                                                                                                                              | NA | EUR             |

|      |             |      |                  |                                                     |         |   |        |    |    |                                                                                                                                                                                                                                                               |          |            |
|------|-------------|------|------------------|-----------------------------------------------------|---------|---|--------|----|----|---------------------------------------------------------------------------------------------------------------------------------------------------------------------------------------------------------------------------------------------------------------|----------|------------|
| 602  | 24816252    | 2014 | Metabolic        | Peptide::gamma-glutamyl::gamma-glutamylglutamine    | 0.01276 | 1 | 7662   | T  | C  | <a href="http://mips.helmholtz-muenchen.de/proj/GWAS/gwas/gwas_server/shin_et_al.metal.out.tar.gz">http://mips.helmholtz-muenchen.de/proj/GWAS/gwas/gwas_server/shin_et_al.metal.out.tar.gz</a>                                                               | NA       | EUR        |
| 704  | 24816252    | 2014 | Metabolic        | :::X-11441                                          | 0.01398 | 1 | 7072   | T  | C  | <a href="http://mips.helmholtz-muenchen.de/proj/GWAS/gwas/gwas_server/shin_et_al.metal.out.tar.gz">http://mips.helmholtz-muenchen.de/proj/GWAS/gwas/gwas_server/shin_et_al.metal.out.tar.gz</a>                                                               | NA       | EUR        |
| 4277 | 30807572    | 2019 | Gastrointestinal | Meconium ileus in cystic fibrosis                   | 0.01415 | 1 | 6770   | T  | C  | <a href="ftp://ftp.ebi.ac.uk/pub/databases/gwas/summary_statistics/GongJ_30807572_GCST007367/GongJ_prePMID_Meconium_Ileus.tsv.gz">ftp://ftp.ebi.ac.uk/pub/databases/gwas/summary_statistics/GongJ_30807572_GCST007367/GongJ_prePMID_Meconium_Ileus.tsv.gz</a> | NA       | EUR        |
| 4670 | BioRxiv: ht | 2019 | Neurological     | Anterior limb of internal capsule axial diuivities  | 0.01475 | 1 | 17706  | T  | C  | <a href="https://www.dropbox.com/s/8heofmignp5m7q85/ukbiobank_dti110_pheno67_txt.zip">https://www.dropbox.com/s/8heofmignp5m7q85/ukbiobank_dti110_pheno67_txt.zip</a>                                                                                         | NA       | UKB2 (EUR) |
| 4485 | 31676860    | 2019 | Neurological     | Right lateral orbitofrontal                         | 0.01534 | 1 | 19629  | T  | C  | <a href="https://www.med.unc.edu/big2/data/gwas-summary-statistics/">https://www.med.unc.edu/big2/data/gwas-summary-statistics/</a>                                                                                                                           | NA       | UKB2 (EUR) |
| 3396 | 31427789    | 2019 | Activities       | Other sociodemographic factors - Private healthcare | 0.01543 | 1 | 128472 | C  | T  | <a href="https://atlas.ctglab.nl/ukb2_sumstats/f.4674.0.0_res.EUR.sumstats.MACfilt.txt.gz">https://atlas.ctglab.nl/ukb2_sumstats/f.4674.0.0_res.EUR.sumstats.MACfilt.txt.gz</a>                                                                               | NA       | UKB2 (EUR) |
| 597  | 24816252    | 2014 | Metabolic        | Peptide::Dipeptide::pyroglutamylglycine             | 0.01612 | 1 | 1586   | C  | T  | <a href="http://mips.helmholtz-muenchen.de/proj/GWAS/gwas/gwas_server/shin_et_al.metal.out.tar.gz">http://mips.helmholtz-muenchen.de/proj/GWAS/gwas/gwas_server/shin_et_al.metal.out.tar.gz</a>                                                               | NA       | EUR        |
| 63   | 28436984    | 2017 | Reproduction     | Age at menarche                                     | 0.017   | 1 | 252514 | C  | T  | <a href="http://www.reprogen.org/Menarche_1KG_NatGen2017_WebsiteUpload.zip">http://www.reprogen.org/Menarche_1KG_NatGen2017_WebsiteUpload.zip</a>                                                                                                             | ReproGen | EUR        |
| 3814 | 20045101    | 2010 | Immunological    | CD8+ T cell level                                   | 0.017   | 1 | 2538   | NA | NA | <a href="https://genepi.qimr.edu.au/staff/manuelF/gwas_results/CD8.assoc.gz">https://genepi.qimr.edu.au/staff/manuelF/gwas_results/CD8.assoc.gz</a>                                                                                                           | NA       | EUR        |

|      |          |      |                |                                                  |         |   |        |    |    |                                                                                                                                                                                                                                                                                                 |        |             |
|------|----------|------|----------------|--------------------------------------------------|---------|---|--------|----|----|-------------------------------------------------------------------------------------------------------------------------------------------------------------------------------------------------------------------------------------------------------------------------------------------------|--------|-------------|
| 3218 | 31427789 | 2019 | Activities     | Time spent outdoors<br>in winter                 | 0.01796 | 1 | 304316 | T  | C  | <a href="https://atlas.ctglab.nl/ukb2_sumstats/f.1060.0.0_res.EUR.sumstats.MACfilt.txt.gz">https://atlas.ctglab.nl/ukb2_sumstats/f.1060.0.0_res.EUR.sumstats.MACfilt.txt.gz</a>                                                                                                                 | NA     | UKB2 (EUR)  |
| 4208 | 31152163 | 2019 | Metabolic      | Blood urea nitrogen                              | 0.01799 | 1 | 243031 | C  | T  | <a href="http://ckdgen.imbi.uni-freiburg.de/files/Wuttke2019/BUN_overall_EA_YL_20171108_METAL_1_nstud24.dbgap.txt.gz">http://ckdgen.imbi.uni-freiburg.de/files/Wuttke2019/BUN_overall_EA_YL_20171108_METAL_1_nstud24.dbgap.txt.gz</a>                                                           | CDKGen | EUR         |
| 845  | 24816252 | 2014 | Metabolic      | ::::X-14658                                      | 0.01828 | 1 | 3533   | C  | T  | <a href="http://mips.helmholtz-muenchen.de/proj/GWAS/gwas/gwas_server/shin_et_al.metal.out.tar.gz">http://mips.helmholtz-muenchen.de/proj/GWAS/gwas/gwas_server/shin_et_al.metal.out.tar.gz</a>                                                                                                 | NA     | EUR         |
| 248  | 25772697 | 2015 | Immunological  | CD337 on NK early                                | 0.0186  | 1 | 669    | T  | C  | <a href="ftp://twinr-ftp.kcl.ac.uk/ImmuneCellScience/2-GWASResults/GWA_MFI_484.txt.gz">ftp://twinr-ftp.kcl.ac.uk/ImmuneCellScience/2-GWASResults/GWA_MFI_484.txt.gz</a>                                                                                                                         | NA     | EUR         |
| 4284 | 30804560 | 2019 | Respiratory    | FEV1/FVC ratio                                   | 0.0187  | 1 | 321047 | C  | T  | <a href="ftp://ftp.ebi.ac.uk/pub/databases/gwas/summary_statistics/ShrineN_30804560_GCST007431/Shrine_30804560_UKBiobank_FEV1_to_FVC_RATIO.txt.gz">ftp://ftp.ebi.ac.uk/pub/databases/gwas/summary_statistics/ShrineN_30804560_GCST007431/Shrine_30804560_UKBiobank_FEV1_to_FVC_RATIO.txt.gz</a> | NA     | UKB2 (EUR)  |
| 1189 | 23388002 | 2013 | Cardiovascular | Aortic-valve<br>calcification                    | 0.02009 | 1 | 6942   | NA | NA | <a href="https://grasp.nhlbi.nih.gov/downloads/ResultsOctober2016/Thanassoulis/AVC_meta_results_dbGAP_2013Jan08.txt">https://grasp.nhlbi.nih.gov/downloads/ResultsOctober2016/Thanassoulis/AVC_meta_results_dbGAP_2013Jan08.txt</a>                                                             | CHARGE | EUR         |
| 4215 | 31015462 | 2019 | Metabolic      | Estimated<br>glomerular filtration<br>rate       | 0.02092 | 1 | 350504 | T  | C  | <a href="http://csg.sph.umich.edu/willer/public/eGFR2018/2018_Graham_et_al_eGFR_meta.tbl">http://csg.sph.umich.edu/willer/public/eGFR2018/2018_Graham_et_al_eGFR_meta.tbl</a>                                                                                                                   | NA     | EUR+EAS     |
| 1119 | 27918534 | 2017 | Metabolic      | Pericardial adipose<br>tissue volume<br>(female) | 0.021   | 1 | 6362   | NA | NA | <a href="https://fox.nhlbi.nih.gov/CKDGen/PAT.tar.gz">https://fox.nhlbi.nih.gov/CKDGen/PAT.tar.gz</a>                                                                                                                                                                                           | CKDGen | EUR+AFR+EAS |



|      |          |      |               |                                                                                     |         |   |        |    |    |                                                                                                                                                                                                 |        |                 |
|------|----------|------|---------------|-------------------------------------------------------------------------------------|---------|---|--------|----|----|-------------------------------------------------------------------------------------------------------------------------------------------------------------------------------------------------|--------|-----------------|
| 3486 | 31427789 | 2019 | Nutritional   | Bread type: Brown                                                                   | 0.0211  | 1 | 372617 | T  | C  | <a href="https://atlas.ctglab.nl/ukb2_sumstats/1448_2_logistic.EUR.sumstats.MACfilt.txt.gz">https://atlas.ctglab.nl/ukb2_sumstats/1448_2_logistic.EUR.sumstats.MACfilt.txt.gz</a>               | NA     | UKB2 (EUR)      |
| 253  | 25772697 | 2015 | Immunological | CD123 on<br>11c+123+DC                                                              | 0.02179 | 1 | 669    | T  | C  | <a href="ftp://twinr-ftp.kcl.ac.uk/ImmuneCellScience/2-GWASResults/GWA_MFI_58.txt.gz">ftp://twinr-ftp.kcl.ac.uk/ImmuneCellScience/2-GWASResults/GWA_MFI_58.txt.gz</a>                           | NA     | EUR             |
| 1122 | 27918534 | 2017 | Metabolic     | Pericardial adipose<br>tissue volume<br>(adjusted for height<br>and weight, female) | 0.022   | 1 | 6362   | NA | NA | <a href="https://fox.nhlbi.nih.gov/CKDGen/PATadjHtWt.tar.gz">https://fox.nhlbi.nih.gov/CKDGen/PATadjHtWt.tar.gz</a>                                                                             | CKDGen | EUR+AFR+EA<br>S |
| 568  | 24816252 | 2014 | Metabolic     | Lipid::Sterol,<br>Steroid::4-androsten-<br>3beta,17beta-diol<br>disulfate 1*        | 0.02212 | 1 | 7804   | C  | T  | <a href="http://mips.helmholtz-muenchen.de/proj/GWAS/gwas/gwas_server/shin_et_al.metal.out.tar.gz">http://mips.helmholtz-muenchen.de/proj/GWAS/gwas/gwas_server/shin_et_al.metal.out.tar.gz</a> | NA     | EUR             |
| 3960 | 28990592 | 2017 | Reproduction  | Gestational weight<br>gain (maternal,<br>total)                                     | 0.02275 | 1 | 10555  | T  | C  | <a href="http://egg-consortium.org/downloads/EGG-TotalGWG-Maternal.txt.gz">http://egg-consortium.org/downloads/EGG-TotalGWG-Maternal.txt.gz</a>                                                 | EGG    | EUR             |
| 739  | 24816252 | 2014 | Metabolic     | :::X-11850                                                                          | 0.02382 | 1 | 4868   | T  | C  | <a href="http://mips.helmholtz-muenchen.de/proj/GWAS/gwas/gwas_server/shin_et_al.metal.out.tar.gz">http://mips.helmholtz-muenchen.de/proj/GWAS/gwas/gwas_server/shin_et_al.metal.out.tar.gz</a> | NA     | EUR             |

|      |          |      |               |                                                                                                                                                                                                                                                             |         |   |        |   |   |                                                                                                                                                                                                                                           |        |                     |
|------|----------|------|---------------|-------------------------------------------------------------------------------------------------------------------------------------------------------------------------------------------------------------------------------------------------------------|---------|---|--------|---|---|-------------------------------------------------------------------------------------------------------------------------------------------------------------------------------------------------------------------------------------------|--------|---------------------|
| 3703 | 31427789 | 2019 | Mortality     | Diagnoses -<br>secondary ICD10:<br>Y83 Surgical<br>operation and other<br>surgical procedures<br>as the cause of<br>abnormal reaction<br>of the patient, or<br>later complication,<br>without mention of<br>misadventure at the<br>time of the<br>procedure | 0.02498 | 1 | 244890 | T | C | <a href="https://atlas.ctglab.nl/ukb2_sumstats/41204_Y83_logistic.EUR.sumstats.MACfilt.txt.gz">https://atlas.ctglab.nl/ukb2_sumstats/41204_Y83_logistic.EUR.sumstats.MACfilt.txt.gz</a>                                                   | NA     | UKB2 (EUR)          |
| 627  | 24816252 | 2014 | Metabolic     | Xenobiotics::Drug::p-<br>acetamidophenylglu<br>curonide                                                                                                                                                                                                     | 0.02559 | 1 | 1494   | C | T | <a href="http://mips.helmholtz-muenchen.de/proj/GWAS/gwas/gwas_server/shin_et_al.xeno.metal.out.tar.gz">http://mips.helmholtz-muenchen.de/proj/GWAS/gwas/gwas_server/shin_et_al.xeno.metal.out.tar.gz</a>                                 | NA     | EUR                 |
| 743  | 24816252 | 2014 | Metabolic     | :::X-11876                                                                                                                                                                                                                                                  | 0.02577 | 1 | 4965   | C | T | <a href="http://mips.helmholtz-muenchen.de/proj/GWAS/gwas/gwas_server/shin_et_al.metal.out.tar.gz">http://mips.helmholtz-muenchen.de/proj/GWAS/gwas/gwas_server/shin_et_al.metal.out.tar.gz</a>                                           | NA     | EUR                 |
| 4207 | 31152163 | 2019 | Metabolic     | Blood urea nitrogen                                                                                                                                                                                                                                         | 0.02635 | 1 | 416178 | C | T | <a href="http://ckdgen.imbi.uni-freiburg.de/files/Wuttke2019/BUN_overall_ALL_YL_20171017_META_L1_nstud_33.dbgap.txt.gz">http://ckdgen.imbi.uni-freiburg.de/files/Wuttke2019/BUN_overall_ALL_YL_20171017_META_L1_nstud_33.dbgap.txt.gz</a> | CDKGen | EUR+EAS+AF<br>R+AMR |
| 242  | 25772697 | 2015 | Immunological | PD1 on CD4mem                                                                                                                                                                                                                                               | 0.02639 | 1 | 669    | T | C | <a href="ftp://twinkl.kcl.ac.uk/ImmuneCellScience/2-GWASResults/GWA_MFI_236.txt.gz">ftp://twinkl.kcl.ac.uk/ImmuneCellScience/2-GWASResults/GWA_MFI_236.txt.gz</a>                                                                         | NA     | EUR                 |

|      |          |      |              |                                                          |         |   |        |    |    |                                                                                                                                                                                                                                                                                                                                                                                                                       |        |                 |
|------|----------|------|--------------|----------------------------------------------------------|---------|---|--------|----|----|-----------------------------------------------------------------------------------------------------------------------------------------------------------------------------------------------------------------------------------------------------------------------------------------------------------------------------------------------------------------------------------------------------------------------|--------|-----------------|
| 519  | 24816252 | 2014 | Metabolic    | Lipid::Long chain fatty acid::eicosenoate (20:1n9 or 11) | 0.02682 | 1 | 7799   | C  | T  | <a href="http://mips.helmholtz-muenchen.de/proj/GWAS/gwas/gwas_server/shin_et_al.metal.out.tar.gz">http://mips.helmholtz-muenchen.de/proj/GWAS/gwas/gwas_server/shin_et_al.metal.out.tar.gz</a>                                                                                                                                                                                                                       | NA     | EUR             |
| 147  | 26426971 | 2015 | Metabolic    | Body Mass Index (male > 50 yrs)                          | 0.027   | 1 | 74324  | C  | T  | <a href="http://portals.broadinstitute.org/collaboration/giant/images/7/7d/BMI.MEN.GT50.publicrelease.txt.gz">http://portals.broadinstitute.org/collaboration/giant/images/7/7d/BMI.MEN.GT50.publicrelease.txt.gz</a>                                                                                                                                                                                                 | GIANT  | EUR             |
| 4549 | 31676860 | 2019 | Neurological | Left entorhinal                                          | 0.02782 | 1 | 21821  | T  | C  | <a href="https://www.med.unc.edu/bigs2/data/gwas-summary-statistics/ftp://ftp.ebi.ac.uk/pub/databases/gwas/summary_statistics/deKovel_CGF_30980028_GCST007592/DeKovel_Pmid30980028_left_pval_maf001.assoc.gz">https://www.med.unc.edu/bigs2/data/gwas-summary-statistics/ftp://ftp.ebi.ac.uk/pub/databases/gwas/summary_statistics/deKovel_CGF_30980028_GCST007592/DeKovel_Pmid30980028_left_pval_maf001.assoc.gz</a> | NA     | UKB2 (EUR meta) |
| 4245 | 30980028 | 2019 | Cognitive    | Left handed                                              | 0.02883 | 1 | 331037 | C  | T  | <a href="https://fox.nhlbi.nih.gov/CKDGen/formatted_Round3_UACR_noDM_2GC_b36_MAFget005_Nget50_2014_09_29.csv.gz">https://fox.nhlbi.nih.gov/CKDGen/formatted_Round3_UACR_noDM_2GC_b36_MAFget005_Nget50_2014_09_29.csv.gz</a>                                                                                                                                                                                           | NA     | UKB2 (EUR)      |
| 199  | 26631737 | 2016 | Metabolic    | Urinary albumin-to-creatinine ratio (non-diabetic)       | 0.029   | 1 | 46061  | T  | C  | <a href="https://grasp.nhlbi.nih.gov/downloads/FullResults/2017/2017_Kim_Plantar_fasciitis/PlantarSummary.txt.zip">https://grasp.nhlbi.nih.gov/downloads/FullResults/2017/2017_Kim_Plantar_fasciitis/PlantarSummary.txt.zip</a>                                                                                                                                                                                       | CKDGen | EUR             |
| 4048 | 29534260 | 2018 | Skeletal     | Plantar fasciitis                                        | 0.03049 | 1 | 102503 | NA | NA | <a href="http://mips.helmholtz-muenchen.de/proj/GWAS/gwas/gwas_server/shin_et_al.metal.out.tar.gz">http://mips.helmholtz-muenchen.de/proj/GWAS/gwas/gwas_server/shin_et_al.metal.out.tar.gz</a>                                                                                                                                                                                                                       | NA     | EUR+AMR+EAS+AFR |
| 849  | 24816252 | 2014 | Metabolic    | :::X-18601 Mineral and other dietary                     | 0.03093 | 1 | 7663   | C  | T  | <a href="https://atlas.ctglab.nl/ukb2_sumstats/6179_5_logistic.EUR.sumstats.MACfilt.txt.gz">https://atlas.ctglab.nl/ukb2_sumstats/6179_5_logistic.EUR.sumstats.MACfilt.txt.gz</a>                                                                                                                                                                                                                                     | NA     | EUR             |
| 3596 | 31427789 | 2019 | Activities   | supplements: Iron                                        | 0.03263 | 1 | 385261 | T  | C  | <a href="https://atlas.ctglab.nl/ukb2_sumstats/6179_5_logistic.EUR.sumstats.MACfilt.txt.gz">https://atlas.ctglab.nl/ukb2_sumstats/6179_5_logistic.EUR.sumstats.MACfilt.txt.gz</a>                                                                                                                                                                                                                                     | NA     | UKB2 (EUR)      |

|      |          |      |             |                                                                 |         |   |        |    |    |                                                                                                                                                                                                                                                                                                 |        |             |
|------|----------|------|-------------|-----------------------------------------------------------------|---------|---|--------|----|----|-------------------------------------------------------------------------------------------------------------------------------------------------------------------------------------------------------------------------------------------------------------------------------------------------|--------|-------------|
| 3934 | 28878392 | 2017 | Metabolic   | Monosialylation                                                 | 0.03316 | 1 | 2078   | NA | NA | <a href="https://datashare.is.ed.ac.uk/bitstream/handle/10283/2738/5104819.zip?sequence=1&amp;isAllowed=y">https://datashare.is.ed.ac.uk/bitstream/handle/10283/2738/5104819.zip?sequence=1&amp;isAllowed=y</a>                                                                                 | NA     | EUR         |
| 518  | 24816252 | 2014 | Metabolic   | Lipid::Long chain fatty acid::dihomo-linoleate (20:2n6)         | 0.03364 | 1 | 7800   | C  | T  | <a href="http://mips.helmholtz-muenchen.de/proj/GWAS/gwas/gwas_server/shin_et_al.metal.out.tar.gz">http://mips.helmholtz-muenchen.de/proj/GWAS/gwas/gwas_server/shin_et_al.metal.out.tar.gz</a>                                                                                                 | NA     | EUR         |
| 1117 | 27918534 | 2017 | Metabolic   | Pericardial adipose tissue volume                               | 0.034   | 1 | 12204  | NA | NA | <a href="https://fox.nhlbi.nih.gov/CKDGen/PAT.tar.gz">https://fox.nhlbi.nih.gov/CKDGen/PAT.tar.gz</a>                                                                                                                                                                                           | CKDGen | EUR+AFR+EAS |
| 3707 | 31427789 | 2019 | Mortality   | Diagnoses - secondary ICD10: Z72 Problems related to lifestyle  | 0.03411 | 1 | 244890 | T  | C  | <a href="https://atlas.ctglab.nl/ukb2_sumstats/41204_Z72_logistic.EUR.sumstats.MACfilt.txt.gz">https://atlas.ctglab.nl/ukb2_sumstats/41204_Z72_logistic.EUR.sumstats.MACfilt.txt.gz</a>                                                                                                         | NA     | UKB2 (EUR)  |
| 576  | 24816252 | 2014 | Metabolic   | Lipid::Sterol, Steroid::dehydroisoandrosterone sulfate (DHEA-S) | 0.03449 | 1 | 7793   | C  | T  | <a href="http://mips.helmholtz-muenchen.de/proj/GWAS/gwas/gwas_server/shin_et_al.metal.out.tar.gz">http://mips.helmholtz-muenchen.de/proj/GWAS/gwas/gwas_server/shin_et_al.metal.out.tar.gz</a>                                                                                                 | NA     | EUR         |
| 4246 | 30980028 | 2019 | Cognitive   | Right handed                                                    | 0.03463 | 1 | 331037 | T  | C  | <a href="ftp://ftp.ebi.ac.uk/pub/databases/gwas/summary_statistics/deKovel_CGF_30980028_GCST007594/DeKovel_PMI30980028_right_pval_maf001.assoc.gz">ftp://ftp.ebi.ac.uk/pub/databases/gwas/summary_statistics/deKovel_CGF_30980028_GCST007594/DeKovel_PMI30980028_right_pval_maf001.assoc.gz</a> | NA     | UKB2 (EUR)  |
| 4303 | 30664634 | 2019 | Metabolic   | Legs-leg fat ratio (male)                                       | 0.03579 | 1 | 167431 | C  | T  | <a href="https://myfiles.uu.se/ssf/s/readFile/share/3993/1270878243748486898/publicLink/GWAS_summary_stats_ratios.zip">https://myfiles.uu.se/ssf/s/readFile/share/3993/1270878243748486898/publicLink/GWAS_summary_stats_ratios.zip</a>                                                         | NA     | UKB2 (EUR)  |
| 3773 | 31427789 | 2019 | Psychiatric | Anxiety - Recent worrying too much about different things       | 0.03688 | 1 | 126284 | T  | C  | <a href="https://atlas.ctglab.nl/ukb2_sumstats/f.20520.0.0_res.EUR.sumstats.MACfilt.txt.gz">https://atlas.ctglab.nl/ukb2_sumstats/f.20520.0.0_res.EUR.sumstats.MACfilt.txt.gz</a>                                                                                                               | NA     | UKB2 (EUR)  |

|      |          |      |               |                                              |         |   |        |   |   |                                                                                                                                                                                                 |       |                 |
|------|----------|------|---------------|----------------------------------------------|---------|---|--------|---|---|-------------------------------------------------------------------------------------------------------------------------------------------------------------------------------------------------|-------|-----------------|
| 3286 | 31427789 | 2019 | Psychiatric   | Irritability                                 | 0.03707 | 1 | 369232 | C | T | <a href="https://atlas.ctglab.nl/ukb2_sumstats/f.1940.0.0_logistic.EUR.sumstats.MACfilt.txt.gz">https://atlas.ctglab.nl/ukb2_sumstats/f.1940.0.0_logistic.EUR.sumstats.MACfilt.txt.gz</a>       | NA    | UKB2 (EUR)      |
| 4610 | 31676860 | 2019 | Neurological  | Cerebellar vermal lobules VIII X             | 0.03729 | 1 | 21821  | C | T | <a href="https://www.med.unc.edu/big2/data/gwas-summary-statistics/">https://www.med.unc.edu/big2/data/gwas-summary-statistics/</a>                                                             | NA    | UKB2 (EUR meta) |
| 220  | 25772697 | 2015 | Immunological | T:%Vd1                                       | 0.03741 | 1 | 669    | T | C | <a href="ftp://twinkl.kcl.ac.uk/ImmuneCellScience/2-GWASResults/GWA_Lin_20.txt.gz">ftp://twinkl.kcl.ac.uk/ImmuneCellScience/2-GWASResults/GWA_Lin_20.txt.gz</a>                                 | NA    | EUR             |
| 839  | 24816252 | 2014 | Metabolic     | :::X-14473                                   | 0.0376  | 1 | 6884   | C | T | <a href="http://mips.helmholtz-muenchen.de/proj/GWAS/gwas/gwas_server/shin_et_al.metal.out.tar.gz">http://mips.helmholtz-muenchen.de/proj/GWAS/gwas/gwas_server/shin_et_al.metal.out.tar.gz</a> | NA    | EUR             |
| 4066 | 30038396 | 2018 | Environment   | Educational attainment                       | 0.0379  | 1 | 766345 | C | T | <a href="https://www.dropbox.com/s/ho58e9jmytmpaf8/GWAS_EA_excl23andMe.txt?dl=1">https://www.dropbox.com/s/ho58e9jmytmpaf8/GWAS_EA_excl23andMe.txt?dl=1</a>                                     | SSGAC | UKB2 (EUR meta) |
| 840  | 24816252 | 2014 | Metabolic     | :::X-14541                                   | 0.03844 | 1 | 1941   | C | T | <a href="http://mips.helmholtz-muenchen.de/proj/GWAS/gwas/gwas_server/shin_et_al.metal.out.tar.gz">http://mips.helmholtz-muenchen.de/proj/GWAS/gwas/gwas_server/shin_et_al.metal.out.tar.gz</a> | NA    | EUR             |
| 3369 | 31427789 | 2019 | Activities    | Frequency of other exercises in last 4 weeks | 0.03854 | 1 | 184631 | T | C | <a href="https://atlas.ctglab.nl/ukb2_sumstats/f.3637.0.0_res.EUR.sumstats.MACfilt.txt.gz">https://atlas.ctglab.nl/ukb2_sumstats/f.3637.0.0_res.EUR.sumstats.MACfilt.txt.gz</a>                 | NA    | UKB2 (EUR)      |
| 4616 | 31676860 | 2019 | Neurological  | 4th ventricle                                | 0.03855 | 1 | 21821  | C | T | <a href="https://www.med.unc.edu/big2/data/gwas-summary-statistics/">https://www.med.unc.edu/big2/data/gwas-summary-statistics/</a>                                                             | NA    | UKB2 (EUR meta) |
| 3781 | 31427789 | 2019 | Psychiatric   | Depression - Trouble falling asleep          | 0.03937 | 1 | 48926  | C | T | <a href="https://atlas.ctglab.nl/ukb2_sumstats/f.20533.0.0_logistic.EUR.sumstats.MACfilt.txt.gz">https://atlas.ctglab.nl/ukb2_sumstats/f.20533.0.0_logistic.EUR.sumstats.MACfilt.txt.gz</a>     | NA    | UKB2 (EUR)      |

|      |          |      |              |                                                                   |         |   |        |   |   |                                                                                                                                                                                                                                                 |        |                 |
|------|----------|------|--------------|-------------------------------------------------------------------|---------|---|--------|---|---|-------------------------------------------------------------------------------------------------------------------------------------------------------------------------------------------------------------------------------------------------|--------|-----------------|
| 4305 | 30664634 | 2019 | Metabolic    | Trunk-trunk fat ratio (male)                                      | 0.03982 | 1 | 167431 | T | C | <a href="https://myfiles.uu.se/ssf/s/readFile/share/3993/1270878243748486898/publicLink/GWAS_summary_stats_ratios.zip">https://myfiles.uu.se/ssf/s/readFile/share/3993/1270878243748486898/publicLink/GWAS_summary_stats_ratios.zip</a>         | NA     | UKB2 (EUR)      |
| 2053 | 24084763 | 2013 | Neoplasms    | Advanced adenoma                                                  | 0.04051 | 1 | 1406   | A | G | <a href="ftp://ftp.ebi.ac.uk/pub/databases/gwas/summary_statistics/WangJ_24084763_GCST002212/adv_adno_assoc.assoc.txt.zip">ftp://ftp.ebi.ac.uk/pub/databases/gwas/summary_statistics/WangJ_24084763_GCST002212/adv_adno_assoc.assoc.txt.zip</a> | NA     | EUR             |
| 696  | 24816252 | 2014 | Metabolic    | ::::X-11374<br>Fluid intelligence test - FI3 : word interpolation | 0.04087 | 1 | 2609   | T | C | <a href="http://mips.helmholtz-muenchen.de/proj/GWAS/gwas/gwas_server/shin_et_al.metal.out.tar.gz">http://mips.helmholtz-muenchen.de/proj/GWAS/gwas/gwas_server/shin_et_al.metal.out.tar.gz</a>                                                 | NA     | EUR             |
| 3426 | 31427789 | 2019 | Cognitive    | Age started wearing glasses or contact lenses                     | 0.04177 | 1 | 99362  | C | T | <a href="https://atlas.ctglab.nl/ukb2_sumstats/f.20169.0.0_logistic.EUR.sumstats.MACfilt.txt.gz">https://atlas.ctglab.nl/ukb2_sumstats/f.20169.0.0_logistic.EUR.sumstats.MACfilt.txt.gz</a>                                                     | NA     | UKB2 (EUR)      |
| 3310 | 31427789 | 2019 | Activities   | Age started wearing glasses or contact lenses                     | 0.04272 | 1 | 332074 | T | C | <a href="https://atlas.ctglab.nl/ukb2_sumstats/f.2217.0.0_res.EUR.sumstats.MACfilt.txt.gz">https://atlas.ctglab.nl/ukb2_sumstats/f.2217.0.0_res.EUR.sumstats.MACfilt.txt.gz</a>                                                                 | NA     | UKB2 (EUR)      |
| 86   | 26367794 | 2015 | Skeletal     | Lumbar Spine BMD                                                  | 0.04311 | 1 | 32965  | T | C | <a href="http://www.gefos.org/sites/default/files/ls2stu.MAFO_005.pos_out.gz">http://www.gefos.org/sites/default/files/ls2stu.MAFO_005.pos_out.gz</a>                                                                                           | GEFOS  | EUR             |
| 1219 | 25607358 | 2015 | Neurological | Mean Accumbens Lipid::Long chain fatty acid::margarate (17:0)     | 0.0443  | 1 | 13171  | T | C | <a href="http://enigma.ini.usc.edu/research/download-enigma-gwas-results/">http://enigma.ini.usc.edu/research/download-enigma-gwas-results/</a>                                                                                                 | ENIGMA | EUR             |
| 520  | 24816252 | 2014 | Metabolic    | Mean Accumbens Lipid::Long chain fatty acid::margarate (17:0)     | 0.0445  | 1 | 7796   | C | T | <a href="http://mips.helmholtz-muenchen.de/proj/GWAS/gwas/gwas_server/shin_et_al.metal.out.tar.gz">http://mips.helmholtz-muenchen.de/proj/GWAS/gwas/gwas_server/shin_et_al.metal.out.tar.gz</a>                                                 | NA     | EUR             |
| 4623 | 31676860 | 2019 | Neurological | Left caudate                                                      | 0.04547 | 1 | 21821  | C | T | <a href="https://www.med.unc.edu/big2/data/gwas-summary-statistics/">https://www.med.unc.edu/big2/data/gwas-summary-statistics/</a>                                                                                                             | NA     | UKB2 (EUR meta) |

|      |          |      |                  |                                                          |         |   |        |   |   |                                                                                                                                                                                                 |     |            |
|------|----------|------|------------------|----------------------------------------------------------|---------|---|--------|---|---|-------------------------------------------------------------------------------------------------------------------------------------------------------------------------------------------------|-----|------------|
| 997  | 27989323 | 2017 | Immunological    | Interferon gamma-induced protein 10 (CXCL10)             | 0.04614 | 1 | 3685   | T | C | <a href="http://www.computationalmedicine.fi/data#Cytokine_GWAS">http://www.computationalmedicine.fi/data#Cytokine_GWAS</a>                                                                     | NA  | EUR        |
| 515  | 24816252 | 2014 | Metabolic        | Lipid::Long chain fatty acid::10-nonadecenoate (19:1n9)  | 0.04803 | 1 | 7789   | C | T | <a href="http://mips.helmholtz-muenchen.de/proj/GWAS/gwas/gwas_server/shin_et_al.metal.out.tar.gz">http://mips.helmholtz-muenchen.de/proj/GWAS/gwas/gwas_server/shin_et_al.metal.out.tar.gz</a> | NA  | EUR        |
| 348  | 25772697 | 2015 | Immunological    | CD8:%R5+                                                 | 0.04822 | 1 | 669    | C | T | <a href="ftp://twinkl.kcl.ac.uk/ImmuneCellScience/2-GWASResults/GWA_P5_CD8_165.txt.gz">ftp://twinkl.kcl.ac.uk/ImmuneCellScience/2-GWASResults/GWA_P5_CD8_165.txt.gz</a>                         | NA  | EUR        |
| 4033 | 30482948 | 2018 | Psychiatric      | Alcohol dependency (unrelated genotyped individuals)     | 0.04827 | 1 | 28757  | T | C | <a href="https://www.med.unc.edu/pgc/results-and-downloads/downloads">https://www.med.unc.edu/pgc/results-and-downloads/downloads</a>                                                           | PGC | EUR        |
| 4461 | 31676860 | 2019 | Neurological     | Left pars orbitalis                                      | 0.04925 | 1 | 19629  | T | C | <a href="https://www.med.unc.edu/big2/data/gwas-summary-statistics/">https://www.med.unc.edu/big2/data/gwas-summary-statistics/</a>                                                             | NA  | UKB2 (EUR) |
| 217  | 25772697 | 2015 | Immunological    | NKT:%4+R5-Diagnoses - secondary ICD10: K29 Gastritis and | 0.04968 | 1 | 669    | T | C | <a href="ftp://twinkl.kcl.ac.uk/ImmuneCellScience/2-GWASResults/GWA_Lin_16.txt.gz">ftp://twinkl.kcl.ac.uk/ImmuneCellScience/2-GWASResults/GWA_Lin_16.txt.gz</a>                                 | NA  | EUR        |
| 3697 | 31427789 | 2019 | Gastrointestinal | duodenitis                                               | 0.04986 | 1 | 244890 | C | T | <a href="https://atlas.ctglab.nl/ukb2_sumstats/41204_K29_logistic.EUR.sumstats.MACfilt.txt.gz">https://atlas.ctglab.nl/ukb2_sumstats/41204_K29_logistic.EUR.sumstats.MACfilt.txt.gz</a>         | NA  | UKB2 (EUR) |

**Supplementary Table 10.** Full table of PheWAS associations between discovery lead sequence variant, rs12776883, and phenotypes in the Copenhagen Hospital Biobank Cardiovascular Disease Cohort. Associations are sorted by p-value and adjusted as described in the Methods section. Only associations with an unadjusted p-value<0.05 are shown.

| phecode | phenotype                                                  | phenotype-category  | p-value  | p-adj     | log-odds | standard-error |
|---------|------------------------------------------------------------|---------------------|----------|-----------|----------|----------------|
| 458.9   | Hypotension NOS                                            | circulatory system  | 0.000649 | 0.0506152 | -0.14155 | 0.0415057      |
| 618.2   | Uterine/Uterovaginal prolapse                              | genitourinary       | 0.00089  | 0.0687493 | 0.183922 | 0.055345       |
| 198.2   | Secondary malignancy of respiratory organs                 | neoplasms           | 0.001369 | 0.1037796 | -0.16376 | 0.0511571      |
| 38.2    | Gram positive septicemia                                   | infectious diseases | 0.001647 | 0.1235669 | -0.16646 | 0.0528895      |
| 364.4   | Corneal degenerations                                      | sense organs        | 0.001692 | 0.1266904 | -0.61085 | 0.194563       |
| 312     | Conduct disorders                                          | mental disorders    | 0.00195  | 0.144542  | 0.538026 | 0.17368        |
| 798     | Malaise and fatigue                                        | symptoms            | 0.00248  | 0.1801822 | -0.44653 | 0.147578       |
| 527.7   | Disturbance of salivary secretion                          | digestive           | 0.003744 | 0.2592242 | -0.42082 | 0.145161       |
| 454     | Varicose veins                                             | circulatory system  | 0.004257 | 0.289171  | 0.227238 | 0.0794975      |
| 70      | Viral hepatitis                                            | infectious diseases | 0.005463 | 0.3548271 | -0.24022 | 0.0864606      |
| 614.54  | Abscess or ulceration of vulva                             | genitourinary       | 0.005828 | 0.3735122 | -0.18877 | 0.0684614      |
| 521.4   | Tooth complications likely association with other diseases | digestive           | 0.006147 | 0.3893552 | 0.577628 | 0.210824       |
| 38.1    | Gram negative septicemia                                   | infectious diseases | 0.007625 | 0.4579255 | -0.11787 | 0.0441758      |
|         | Malignant neoplasm of other and ill-defined sites within   |                     |          |           |          |                |
| 159     | the digestive organs and peritoneum                        | neoplasms           | 0.008195 | 0.4822707 | -0.19872 | 0.0751588      |
| 601.3   | Orchitis and epididymitis                                  | genitourinary       | 0.008389 | 0.4903169 | 0.484586 | 0.183834       |
| 686     | Other local infections of skin and subcutaneous tissue     | dermatologic        | 0.010061 | 0.5546764 | -0.06769 | 0.0262985      |
| 365.2   | Primary angle-closure glaucoma                             | sense organs        | 0.011396 | 0.6002389 | 0.239145 | 0.0945114      |
| 613     | Other nonmalignant breast conditions                       | genitourinary       | 0.011893 | 0.6160104 | 0.251758 | 0.100091       |
| 324     | Other CNS infection and poliomyelitis                      | neurological        | 0.012021 | 0.6199617 | 0.352741 | 0.140448       |
| 578.8   | Hemorrhage of rectum and anus                              | digestive           | 0.012363 | 0.6303404 | -0.07003 | 0.0279933      |
| 614.32  | Chronic inflammatory pelvic disease                        | genitourinary       | 0.012914 | 0.6464997 | 0.263763 | 0.106094       |
| 276.42  | Alkalosis                                                  | endocrine/metabolic | 0.013091 | 0.6515249 | -0.51759 | 0.208595       |
| 133     | Arthropod-borne diseases                                   | infectious diseases | 0.015094 | 0.7037896 | -0.39003 | 0.160496       |
| 442.3   | Aneurysm of artery of lower extremity                      | circulatory system  | 0.015105 | 0.7040656 | 0.227314 | 0.0935507      |



|                                                              |                         |          |           |          |           |
|--------------------------------------------------------------|-------------------------|----------|-----------|----------|-----------|
| 701.5 Abnormal granulation tissue                            | dermatologic            | 0.015556 | 0.7147152 | 0.370131 | 0.152999  |
| 747.1 Cardiac congenital anomalies                           | congenital anomalies    | 0.0166   | 0.7379322 | -0.20095 | 0.0838883 |
| 285.22 Anemia in neoplastic disease                          | hematopoietic           | 0.017681 | 0.7599988 | -0.11725 | 0.0494243 |
| 772 Symptoms of the muscles                                  | symptoms                | 0.018016 | 0.7664737 | -0.21602 | 0.09133   |
| Nephrotic syndrome without mention of                        |                         |          |           |          |           |
| 580.2 glomerulonephritis                                     | genitourinary           | 0.019087 | 0.7859816 | -0.21006 | 0.0896239 |
| 38 Septicemia                                                | infectious diseases     | 0.019308 | 0.7898051 | -0.05166 | 0.0220808 |
| 603.2 Spermatocoele                                          | genitourinary           | 0.019541 | 0.7937634 | 0.138118 | 0.0591497 |
| 963 Poisoning by primarily systemic agents                   | injuries & poisonings   | 0.020166 | 0.8040179 | -0.22582 | 0.0971993 |
| 228 Hemangioma and lymphangioma, any site                    | neoplasms               | 0.020456 | 0.8086183 | 0.15191  | 0.0655389 |
| 229 Benign neoplasm of unspecified sites                     | neoplasms               | 0.021194 | 0.8198154 | 0.164327 | 0.0713069 |
| 740.9 Osteoarthritis NOS                                     | musculoskeletal         | 0.021753 | 0.8278605 | 0.064326 | 0.0280331 |
| 350.2 Abnormality of gait                                    | neurological            | 0.024005 | 0.8568501 | 0.200031 | 0.088625  |
| 465.4 Acute laryngitis and tracheitis                        | respiratory             | 0.024137 | 0.8583897 | -0.18037 | 0.0799868 |
| 473.4 Voice disturbance                                      | respiratory             | 0.02446  | 0.8620888 | 0.108173 | 0.0480804 |
| 634.3 Ectopic pregnancy                                      | pregnancy complications | 0.024831 | 0.8662237 | 0.119562 | 0.0532802 |
| 1005 Other symptoms                                          | Unknown                 | 0.025521 | 0.8735803 | -0.04583 | 0.0205181 |
| 593 Hematuria                                                | genitourinary           | 0.025534 | 0.8737205 | 0.306388 | 0.137195  |
| 625.1 Dyspareunia                                            | genitourinary           | 0.026488 | 0.8832376 | 0.132712 | 0.0598076 |
| 427.3 Other specified cardiac dysrhythmias                   | circulatory system      | 0.027166 | 0.8895693 | -0.0919  | 0.0416023 |
| 315.3 Mental retardation                                     | mental disorders        | 0.027544 | 0.8929492 | -0.21525 | 0.097674  |
| 374.1 Ectropion or entropion                                 | sense organs            | 0.028019 | 0.897055  | 0.143112 | 0.0651392 |
| 320 Meningitis                                               | neurological            | 0.029187 | 0.9064927 | 0.120583 | 0.0552889 |
| 618.1 Prolapse of vaginal walls                              | genitourinary           | 0.029767 | 0.9108603 | 0.07213  | 0.0331909 |
| 165.1 Cancer of bronchus; lung                               | neoplasms               | 0.029909 | 0.9118946 | -0.06716 | 0.0309311 |
| 295.1 Schizophrenia                                          | mental disorders        | 0.030539 | 0.9163599 | 0.135615 | 0.0626971 |
| 646 Other complications of pregnancy NEC                     | pregnancy complications | 0.031194 | 0.9207593 | 0.066871 | 0.0310365 |
| 966 Poisoning by anticonvulsants and anti-Parkinsonism drugs | injuries & poisonings   | 0.03207  | 0.9262922 | -0.20683 | 0.0964902 |
| 290.1 Dementias                                              | mental disorders        | 0.032075 | 0.9263237 | -0.14461 | 0.0674642 |
| 755.61 Congenital hip dysplasia and deformity                | congenital anomalies    | 0.032626 | 0.9296059 | -0.15601 | 0.0730181 |
| 214.1 Lipoma of skin and subcutaneous tissue                 | neoplasms               | 0.03359  | 0.935     | 0.085647 | 0.0403052 |
| 285 Other anemias                                            | hematopoietic           | 0.033695 | 0.9355645 | -0.04033 | 0.0189901 |

|                                                             |                         |          |           |          |           |
|-------------------------------------------------------------|-------------------------|----------|-----------|----------|-----------|
| 1015 Effects of other external causes                       | Unknown                 | 0.03387  | 0.9364915 | 0.078297 | 0.0369045 |
| 433 Cerebrovascular disease                                 | circulatory system      | 0.03464  | 0.9404149 | 0.129566 | 0.0613317 |
| 994.2 Sepsis                                                | injuries & poisonings   | 0.035613 | 0.9450328 | -0.04792 | 0.0228038 |
| 451.2 Phlebitis and thrombophlebitis of lower extremities   | circulatory system      | 0.035796 | 0.9458625 | -0.05786 | 0.0275635 |
| 512.7 Shortness of breath                                   | respiratory             | 0.036034 | 0.9469183 | -0.03409 | 0.0162597 |
| 303.4 Somatoform disorder                                   | mental disorders        | 0.037255 | 0.9520394 | 0.163923 | 0.0786971 |
| 722.9 Other and unspecified disc disorder                   | musculoskeletal         | 0.037267 | 0.9520838 | 0.074655 | 0.035843  |
| 187.8 Neoplasm of uncertain behavior of male genital organs | neoplasms               | 0.037911 | 0.9545844 | 0.386172 | 0.186034  |
| 272.12 Hyperglyceridemia                                    | endocrine/metabolic     | 0.039518 | 0.9602697 | -0.26931 | 0.130814  |
| 355 Complex regional/central pain syndrome                  | neurological            | 0.040584 | 0.9636471 | -0.39726 | 0.193996  |
| 250.13 Type 1 diabetes with ophthalmic manifestations       | endocrine/metabolic     | 0.041014 | 0.9649257 | 0.130954 | 0.0640867 |
| 756.5 Congenital osteodystrophies                           | congenital anomalies    | 0.041229 | 0.9655491 | -0.26418 | 0.129422  |
| 674 Other complications of the puerperium NEC               | pregnancy complications | 0.041237 | 0.9655736 | 0.131889 | 0.0646156 |
| 569.1 Toxic gastroenteritis and colitis                     | digestive               | 0.04164  | 0.9667113 | -0.30076 | 0.147642  |
| 773 Pain in limb                                            | symptoms                | 0.042416 | 0.9688004 | -0.03687 | 0.0181681 |
| 716.8 Palindromic rheumatism                                | musculoskeletal         | 0.043909 | 0.9724608 | 0.318456 | 0.158045  |
| 524.3 Anomalies of tooth position/malocclusion              | digestive               | 0.044548 | 0.9738962 | 0.152205 | 0.0757654 |
| 509.5 Respiratory arrest                                    | respiratory             | 0.044672 | 0.9741665 | -0.18834 | 0.0938059 |
| 151 Cancer of stomach                                       | neoplasms               | 0.046523 | 0.9778788 | -0.12058 | 0.0605762 |
| 626.12 Excessive or frequent menstruation                   | genitourinary           | 0.046643 | 0.9781007 | 0.07988  | 0.0401504 |
| 370 Keratitis                                               | sense organs            | 0.046862 | 0.9784986 | 0.115226 | 0.0579742 |
| 602 Other disorders of prostate                             | genitourinary           | 0.047971 | 0.9804111 | -0.34791 | 0.175924  |
| 519.2 Respiratory complications                             | respiratory             | 0.048407 | 0.9811161 | -0.28176 | 0.142753  |
| 250.21 Type 2 diabetes with ketoacidosis                    | endocrine/metabolic     | 0.048472 | 0.9812185 | -0.25669 | 0.130088  |
| 597.1 Urethral stricture (not specified as infectious)      | genitourinary           | 0.048556 | 0.9813504 | -0.11098 | 0.0562626 |
| 627 Menopausal and postmenopausal disorders                 | genitourinary           | 0.048985 | 0.9820112 | 0.293956 | 0.149313  |
| 204 Leukemia                                                | neoplasms               | 0.049864 | 0.9832949 | -0.26093 | 0.133049  |

**Supplementary Table 11.** Full table of PheWAS associations between the meta-analysis lead sequence variant, rs71543507, and phenotypes found in the GWAS ATLAS resource. (<https://atlas.ctglab.nl/>). Associations are sorted by Bonferroni-corrected p-value. Only associations with an unadjusted p-value<0.05 are shown.

| atlas |          |      |                |                                                                                                            |         |       |         |    |     |                                                                                                                                                                                                                                                                 |            |                 |
|-------|----------|------|----------------|------------------------------------------------------------------------------------------------------------|---------|-------|---------|----|-----|-----------------------------------------------------------------------------------------------------------------------------------------------------------------------------------------------------------------------------------------------------------------|------------|-----------------|
| ID    | PMID     | Year | Domain         | Trait                                                                                                      | P-value | P-adj | N       | EA | NEA | File                                                                                                                                                                                                                                                            | Consortium | Population      |
| 3751  | 31427789 | 2019 | Psychiatric    | Traumatic events - Avoided activities or situations because of previous stressful experience in past month | 0.00199 | 1     | 126606  | G  | A   | <a href="https://atlas.ctglab.nl/ukb2_sumstats/f.20495.0.0_res.EUR.sumstats.MA.Cfilt.txt.gz">https://atlas.ctglab.nl/ukb2_sumstats/f.20495.0.0_res.EUR.sumstats.MA.Cfilt.txt.gz</a>                                                                             | NA         | UKB2 (EUR)      |
| 4361  | 30061737 | 2018 | Cardiovascular | Atrial fibrillation                                                                                        | 0.00211 | 1     | 1030836 | G  | A   | <a href="http://csg.sph.umich.edu/willer/public/afib2018/nielsen-thorolfsdottir-willer-NG2018-AFib-gwas-summary-statistics.tbl.gz">http://csg.sph.umich.edu/willer/public/afib2018/nielsen-thorolfsdottir-willer-NG2018-AFib-gwas-summary-statistics.tbl.gz</a> | NA         | EUR             |
| 3752  | 31427789 | 2019 | Psychiatric    | Traumatic events - Felt distant from other people in past month                                            | 0.00377 | 1     | 57017   | G  | A   | <a href="https://atlas.ctglab.nl/ukb2_sumstats/f.20496.0.0_res.EUR.sumstats.MA.Cfilt.txt.gz">https://atlas.ctglab.nl/ukb2_sumstats/f.20496.0.0_res.EUR.sumstats.MA.Cfilt.txt.gz</a>                                                                             | NA         | UKB2 (EUR)      |
| 4485  | 31676860 | 2019 | Neurological   | Right lateral orbitofrontal                                                                                | 0.00402 | 1     | 19629   | A  | G   | <a href="https://www.med.unc.edu/bigs2/data/gwas-summary-statistics/">https://www.med.unc.edu/bigs2/data/gwas-summary-statistics/</a>                                                                                                                           | NA         | UKB2 (EUR)      |
| 4498  | 31676860 | 2019 | Neurological   | Right precuneus                                                                                            | 0.00414 | 1     | 19629   | A  | G   | <a href="https://www.med.unc.edu/bigs2/data/gwas-summary-statistics/">https://www.med.unc.edu/bigs2/data/gwas-summary-statistics/</a>                                                                                                                           | NA         | UKB2 (EUR)      |
| 4586  | 31676860 | 2019 | Neurological   | Right lateral orbitofrontal                                                                                | 0.00438 | 1     | 21821   | A  | G   | <a href="https://www.med.unc.edu/bigs2/data/gwas-summary-statistics/">https://www.med.unc.edu/bigs2/data/gwas-summary-statistics/</a>                                                                                                                           | NA         | UKB2 (EUR meta) |

|      |          |      |                |                                                        |         |   |        |   |   |                                                                                                                                                                                                                                                                                                                       |     |                 |
|------|----------|------|----------------|--------------------------------------------------------|---------|---|--------|---|---|-----------------------------------------------------------------------------------------------------------------------------------------------------------------------------------------------------------------------------------------------------------------------------------------------------------------------|-----|-----------------|
| 4599 | 31676860 | 2019 | Neurological   | Right precuneus                                        | 0.00446 | 1 | 21821  | A | G | <a href="https://www.med.unc.edu/bigs2/data/gwas-summary-statistics/">https://www.med.unc.edu/bigs2/data/gwas-summary-statistics/</a>                                                                                                                                                                                 | NA  | UKB2 (EUR meta) |
| 4268 | 29892015 | 2018 | Cardiovascular | Atrial Fibrillation                                    | 0.00508 | 1 | 588190 | G | A | <a href="https://personal.broadinstitute.org/mvon/AF_HR_C_GWAS_ALLv11.zip">https://personal.broadinstitute.org/mvon/AF_HR_C_GWAS_ALLv11.zip</a>                                                                                                                                                                       | NA  | EUR+AFR+EAS+AMR |
| 4362 | 29899525 | 2018 | Activities     | Acceleration average                                   | 0.0055  | 1 | 91084  | A | G | <a href="ftp://ftp.ebi.ac.uk/pub/databases/gwas/summary_statistics/KlimentidisYC_29899525_GCST006099/Klimentidis_29899525_AccAve_Model1_BOL_TLMM_500K.txt.gz">ftp://ftp.ebi.ac.uk/pub/databases/gwas/summary_statistics/KlimentidisYC_29899525_GCST006099/Klimentidis_29899525_AccAve_Model1_BOL_TLMM_500K.txt.gz</a> | NA  | UKB2 (EUR)      |
| 4041 | 29906448 | 2018 | Psychiatric    | Schizophrenia vs Bipolar disorder                      | 0.00562 | 1 | 38855  | G | A | <a href="https://www.med.unc.edu/pgc/results-and-downloads/downloads">https://www.med.unc.edu/pgc/results-and-downloads/downloads</a>                                                                                                                                                                                 | PGC | EUR             |
| 3254 | 31427789 | 2019 | Nutritional    | Salt added to food                                     | 0.00782 | 1 | 386322 | G | A | <a href="https://atlas.ctglab.nl/ukb2_sumstats/f.1478.0.0_res.EUR.sumstats.MACfilt.txt.gz">https://atlas.ctglab.nl/ukb2_sumstats/f.1478.0.0_res.EUR.sumstats.MACfilt.txt.gz</a>                                                                                                                                       | NA  | UKB2 (EUR)      |
| 3563 | 31427789 | 2019 | Activities     | Vitamin and mineral supplements: Vitamin C             | 0.00787 | 1 | 384452 | A | G | <a href="https://atlas.ctglab.nl/ukb2_sumstats/f.1478.0.0_logistic.EUR.sumstats.MACfilt.txt.gz">https://atlas.ctglab.nl/ukb2_sumstats/f.1478.0.0_logistic.EUR.sumstats.MACfilt.txt.gz</a>                                                                                                                             | NA  | UKB2 (EUR)      |
| 3404 | 31427789 | 2019 | Cognitive      | Fluid intelligence test - FI6 : conditional arithmetic | 0.00843 | 1 | 96994  | G | A | <a href="https://atlas.ctglab.nl/ukb2_sumstats/f.4990.0.0_logistic.EUR.sumstats.MACfilt.txt.gz">https://atlas.ctglab.nl/ukb2_sumstats/f.4990.0.0_logistic.EUR.sumstats.MACfilt.txt.gz</a>                                                                                                                             | NA  | UKB2 (EUR)      |

|      |          |      |                |                                                                  |         |   |       |   |   |                                                                                                                                                                                                                                                                                                                                                                                                                   |               |            |
|------|----------|------|----------------|------------------------------------------------------------------|---------|---|-------|---|---|-------------------------------------------------------------------------------------------------------------------------------------------------------------------------------------------------------------------------------------------------------------------------------------------------------------------------------------------------------------------------------------------------------------------|---------------|------------|
| 3422 | 31427789 | 2019 | Cognitive      | Trail making test - Duration to complete numeric path (trail #1) | 0.01004 | 1 | 84261 | G | A | <a href="https://atlas.ctglab.nl/ukb2_sumstats/f.20156.0.0_res.EUR.sumstats.MACfilt.txt.gz">https://atlas.ctglab.nl/ukb2_sumstats/f.20156.0.0_res.EUR.sumstats.MACfilt.txt.gz</a>                                                                                                                                                                                                                                 | NA            | UKB2 (EUR) |
| 1198 | 25027320 | 2014 | Psychiatric    | Phosphorylated Tau at position 181                               | 0.0101  | 1 | 363   | G | A | <a href="https://grasp.nhlbi.nih.gov/downloads/ResultsOctober2016/Ramirez/MAA_pTau181_Short.zip">https://grasp.nhlbi.nih.gov/downloads/ResultsOctober2016/Ramirez/MAA_pTau181_Short.zip</a>                                                                                                                                                                                                                       | NA            | EUR        |
| 4415 | 30053915 | 2018 | Immunological  | Varicella Zoster Virus seropositivity                            | 0.0108  | 1 | 1000  | A | G | <a href="https://zenodo.org/record/1217136/files/GWAS_Serostatus.tar.gz">https://zenodo.org/record/1217136/files/GWAS_Serostatus.tar.gz</a>                                                                                                                                                                                                                                                                       | Milieu Int?@i | EUR        |
| 4335 | 30531941 | 2018 | Activities     | Overall activity                                                 | 0.011   | 1 | 91105 | A | G | <a href="https://ora.ox.ac.uk/objects/uuid:ff479f44-bf35-48b9-9e67-e690a2937b22/download_file?file_format=gzip&amp;safe_filename=Doherty-2018-NatureComms-overall-activity.csv.gz&amp;type_of_work=Dataset">https://ora.ox.ac.uk/objects/uuid:ff479f44-bf35-48b9-9e67-e690a2937b22/download_file?file_format=gzip&amp;safe_filename=Doherty-2018-NatureComms-overall-activity.csv.gz&amp;type_of_work=Dataset</a> | NA            | UKB2 (EUR) |
| 1135 | 26482879 | 2015 | Dermatological | Eczema                                                           | 0.01184 | 1 | 40835 | G | A | <a href="https://data.bris.ac.uk/datasets/28uchsdpmub118uex26ylacqm/EAGLE_AD_GWAS_results_2015.txt.gz">https://data.bris.ac.uk/datasets/28uchsdpmub118uex26ylacqm/EAGLE_AD_GWAS_results_2015.txt.gz</a>                                                                                                                                                                                                           | EAGLE         | EUR        |
| 4386 | 30898391 | 2019 | Neoplasms      | Epithelial ovarian cancer (Borderline serous and mucinous)       | 0.0139  | 1 | 4340  | G | A | <a href="ftp://ftp.ebi.ac.uk/pub/databases/gwas/summary_statistics/LawrensonK_30898391_GCST007728">ftp://ftp.ebi.ac.uk/pub/databases/gwas/summary_statistics/LawrensonK_30898391_GCST007728</a>                                                                                                                                                                                                                   | NA            | EAS        |

|      |          |      |             |                                                          |         |   |        |   |   |                                                                                                                                                                                                                                                                                                                                                                                                 |    |            |
|------|----------|------|-------------|----------------------------------------------------------|---------|---|--------|---|---|-------------------------------------------------------------------------------------------------------------------------------------------------------------------------------------------------------------------------------------------------------------------------------------------------------------------------------------------------------------------------------------------------|----|------------|
| 4339 | 30531941 | 2018 | Activities  | Walking                                                  | 0.014   | 1 | 91105  | A | G | <a href="https://ora.ox.ac.uk/objects/uuid:ff479f44-bf35-48b9-9e67-e690a2937b22/download_file?file_format=gzip&amp;safe_filename=Doherty-2018-NatureComms-walking.csv.gz&amp;type_of_work=Dataset">https://ora.ox.ac.uk/objects/uuid:ff479f44-bf35-48b9-9e67-e690a2937b22/download_file?file_format=gzip&amp;safe_filename=Doherty-2018-NatureComms-walking.csv.gz&amp;type_of_work=Dataset</a> | NA | UKB2 (EUR) |
| 3371 | 31427789 | 2019 | Respiratory | Chest pain or discomfort when walking uphill or hurrying | 0.01796 | 1 | 48190  | G | A | <a href="https://atlas.ctglab.nl/ukb2_sumstats/f.3751.0.0_logistic.EUR.sumstats.MACfilt.txt.gz">https://atlas.ctglab.nl/ukb2_sumstats/f.3751.0.0_logistic.EUR.sumstats.MACfilt.txt.gz</a>                                                                                                                                                                                                       | NA | UKB2 (EUR) |
| 4239 | 30995994 | 2019 | Cognitive   | Latent naming speed                                      | 0.01832 | 1 | 441    | A | G | <a href="ftp://ftp.ebi.ac.uk/pub/databases/gwas/summary_statistics/TruongDT_30995994_GCST007862/TruongDT_prePMID_GRaDAA_LatentNamingSpeedGWAS_SummaryStats.txt">ftp://ftp.ebi.ac.uk/pub/databases/gwas/summary_statistics/TruongDT_30995994_GCST007862/TruongDT_prePMID_GRaDAA_LatentNamingSpeedGWAS_SummaryStats.txt</a>                                                                       | NA | AFR        |
| 3778 | 31427789 | 2019 | Psychiatric | Traumatic events - Victim of physically violent crime    | 0.02044 | 1 | 126580 | G | A | <a href="https://atlas.ctglab.nl/ukb2_sumstats/f.20529.0.0_logistic.EUR.sumstats.MACfilt.txt.gz">https://atlas.ctglab.nl/ukb2_sumstats/f.20529.0.0_logistic.EUR.sumstats.MACfilt.txt.gz</a>                                                                                                                                                                                                     | NA | UKB2 (EUR) |
| 4098 | 29403010 | 2018 | Metabolic   | Total cholesterol                                        | 0.0209  | 1 | 128305 | A | G | <a href="http://jenger.riken.jp/en/result">http://jenger.riken.jp/en/result</a>                                                                                                                                                                                                                                                                                                                 | NA | EAS        |
| 3766 | 31427789 | 2019 | Psychiatric | Depression - Recent thoughts of suicide or self-harm     | 0.02129 | 1 | 125844 | G | A | <a href="https://atlas.ctglab.nl/ukb2_sumstats/f.20513.0.0_res.EUR.sumstats.MACfilt.txt.gz">https://atlas.ctglab.nl/ukb2_sumstats/f.20513.0.0_res.EUR.sumstats.MACfilt.txt.gz</a>                                                                                                                                                                                                               | NA | UKB2 (EUR) |

|      |          |      |                  |                                                                              |         |   |        |   |   |                                                                                                                                                                                             |    |                    |
|------|----------|------|------------------|------------------------------------------------------------------------------|---------|---|--------|---|---|---------------------------------------------------------------------------------------------------------------------------------------------------------------------------------------------|----|--------------------|
| 862  | 27005778 | 2016 | Metabolic        | Creatinine                                                                   | 0.02229 | 1 | 24810  | A | G | <a href="http://www.computationalmedicine.fi/data/NMR_GWAS/">http://www.computationalmedicine.fi/data/NMR_GWAS/</a>                                                                         | NA | EUR                |
| 3439 | 31427789 | 2019 | Psychiatric      | Tobacco smoking                                                              | 0.02309 | 1 | 97172  | G | A | <a href="https://atlas.ctglab.nl/ukb2_sumstats/f.22506.0.0_res.EUR.sumstats.MACfilt.txt.gz">https://atlas.ctglab.nl/ukb2_sumstats/f.22506.0.0_res.EUR.sumstats.MACfilt.txt.gz</a>           | NA | UKB2 (EUR)         |
| 3427 | 31427789 | 2019 | Cognitive        | Fluid intelligence test - FI4 :<br>positional arithmetic                     | 0.02386 | 1 | 98875  | A | G | <a href="https://atlas.ctglab.nl/ukb2_sumstats/f.20171.0.0_logistic.EUR.sumstats.MACfilt.txt.gz">https://atlas.ctglab.nl/ukb2_sumstats/f.20171.0.0_logistic.EUR.sumstats.MACfilt.txt.gz</a> | NA | UKB2 (EUR)         |
| 3234 | 31427789 | 2019 | Psychiatric      | Daytime dozing / sleeping<br>(narcolepsy)                                    | 0.02457 | 1 | 384879 | G | A | <a href="https://atlas.ctglab.nl/ukb2_sumstats/f.1220.0.0_res.EUR.sumstats.MACfilt.txt.gz">https://atlas.ctglab.nl/ukb2_sumstats/f.1220.0.0_res.EUR.sumstats.MACfilt.txt.gz</a>             | NA | UKB2 (EUR)         |
| 3274 | 31427789 | 2019 | Dermatological   | Ease of skin tanning                                                         | 0.02545 | 1 | 378364 | G | A | <a href="https://atlas.ctglab.nl/ukb2_sumstats/f.1727.0.0_res.EUR.sumstats.MACfilt.txt.gz">https://atlas.ctglab.nl/ukb2_sumstats/f.1727.0.0_res.EUR.sumstats.MACfilt.txt.gz</a>             | NA | UKB2 (EUR)         |
| 3670 | 31427789 | 2019 | Gastrointestinal | Diagnoses - main ICD10: K29<br>Gastritis and duodenitis                      | 0.02621 | 1 | 300791 | G | A | <a href="https://atlas.ctglab.nl/ukb2_sumstats/41202_K29_logistic.EUR.sumstats.MACfilt.txt.gz">https://atlas.ctglab.nl/ukb2_sumstats/41202_K29_logistic.EUR.sumstats.MACfilt.txt.gz</a>     | NA | UKB2 (EUR)         |
| 3750 | 31427789 | 2019 | Psychiatric      | Traumatic events - Felt<br>irritable or had angry<br>outbursts in past month | 0.02639 | 1 | 57010  | G | A | <a href="https://atlas.ctglab.nl/ukb2_sumstats/f.20494.0.0_res.EUR.sumstats.MACfilt.txt.gz">https://atlas.ctglab.nl/ukb2_sumstats/f.20494.0.0_res.EUR.sumstats.MACfilt.txt.gz</a>           | NA | UKB2 (EUR)         |
| 4316 | 30643251 | 2019 | Psychiatric      | Smoking cessation                                                            | 0.0275  | 1 | 312821 | G | A | <a href="https://conservancy.umn.edu/handle/11299/201564">https://conservancy.umn.edu/handle/11299/201564</a>                                                                               | NA | UKB2 (EUR<br>meta) |

|      |          |      |              |                                                      |         |   |        |   |   |                                                                                                                                                                                     |              |                 |
|------|----------|------|--------------|------------------------------------------------------|---------|---|--------|---|---|-------------------------------------------------------------------------------------------------------------------------------------------------------------------------------------|--------------|-----------------|
| 3951 | 28931804 | 2017 | Neurological | Amyotrophic lateral sclerosis (LMM)                  | 0.02889 | 1 | 4084   | G | A | <a href="http://cnsgenomics.com/data/benyamin_et_al_2017_nc/BenyaminEtAl_NatComm_Data.zip">http://cnsgenomics.com/data/benyamin_et_al_2017_nc/BenyaminEtAl_NatComm_Data.zip</a>     | NA           | EAS             |
| 3950 | 28931804 | 2017 | Neurological | Amyotrophic lateral sclerosis (logistic)             | 0.02896 | 1 | 4084   | G | A | <a href="http://cnsgenomics.com/data/benyamin_et_al_2017_nc/BenyaminEtAl_NatComm_Data.zip">http://cnsgenomics.com/data/benyamin_et_al_2017_nc/BenyaminEtAl_NatComm_Data.zip</a>     | NA           | EAS             |
| 40   | 27046643 | 2016 | Cognitive    | Reaction time                                        | 0.02901 | 1 | 111483 | G | A | <a href="http://www.psy.ed.ac.uk/ccace/downloads/Davies_MP_2016.zip">http://www.psy.ed.ac.uk/ccace/downloads/Davies_MP_2016.zip</a>                                                 | CCACE        | UKB1 (EUR)      |
| 3768 | 31427789 | 2019 | Psychiatric  | Anxiety - Recent trouble relaxing                    | 0.0292  | 1 | 126422 | G | A | <a href="https://atlas.ctglab.nl/ukb2_sumstats/f.20515.0_0_res.EUR.sumstats.MA.Cfilt.txt.gz">https://atlas.ctglab.nl/ukb2_sumstats/f.20515.0_0_res.EUR.sumstats.MA.Cfilt.txt.gz</a> | NA           | UKB2 (EUR)      |
| 3241 | 31427789 | 2019 | Nutritional  | Salad / raw vegetable intake                         | 0.02923 | 1 | 363780 | G | A | <a href="https://atlas.ctglab.nl/ukb2_sumstats/f.1299.0_0_res.EUR.sumstats.MA.Cfilt.txt.gz">https://atlas.ctglab.nl/ukb2_sumstats/f.1299.0_0_res.EUR.sumstats.MA.Cfilt.txt.gz</a>   | NA           | UKB2 (EUR)      |
| 3488 | 31427789 | 2019 | Nutritional  | Cereal type: Bran cereal (e.g. All Bran, Branflakes) | 0.03004 | 1 | 319477 | A | G | <a href="https://atlas.ctglab.nl/ukb2_sumstats/1468_1_logistic.EUR.sumstats.MA.Cfilt.txt.gz">https://atlas.ctglab.nl/ukb2_sumstats/1468_1_logistic.EUR.sumstats.MA.Cfilt.txt.gz</a> | NA           | UKB2 (EUR)      |
| 4607 | 31676860 | 2019 | Neurological | Right insula                                         | 0.03067 | 1 | 21821  | A | G | <a href="https://www.med.unc.edu/bigs2/data/gwas-summary-statistics/">https://www.med.unc.edu/bigs2/data/gwas-summary-statistics/</a>                                               | NA           | UKB2 (EUR meta) |
| 4413 | 30053915 | 2018 | Cell         | Total IgE levels                                     | 0.03141 | 1 | 1000   | A | G | <a href="https://zenodo.org/record/1217136/files/GWAS_TotalIg_levels.tar.gz">https://zenodo.org/record/1217136/files/GWAS_TotalIg_levels.tar.gz</a>                                 | Milieu Int?© | EUR             |



|      |          |      |                |                                                     |         |   |        |   |   |                                                                                                                                     |           |                 |
|------|----------|------|----------------|-----------------------------------------------------|---------|---|--------|---|---|-------------------------------------------------------------------------------------------------------------------------------------|-----------|-----------------|
| 4241 | 30995994 | 2019 | Cognitive      | Rapid alternating stimulus test for letters/numbers | 0.03147 | 1 | 1324   | A | G | ftp://ftp.ebi.ac.uk/pub/databases/gwas/summary_statistics/TruongDT_30995994_GCST007863/TruongDT_prePMID_RanLettNum_SummaryStats.txt | NA        | AMR+AFR         |
| 4528 | 31676860 | 2019 | Neurological   | Left ventral DC                                     | 0.03169 | 1 | 19629  | G | A | https://www.med.unc.edu/bigs2/data/gwas-summary-statistics/                                                                         | NA        | UKB2 (EUR)      |
| 4629 | 31676860 | 2019 | Neurological   | Left ventral DC                                     | 0.03248 | 1 | 21821  | G | A | https://www.med.unc.edu/bigs2/data/gwas-summary-statistics/                                                                         | NA        | UKB2 (EUR meta) |
| 4243 | 30995994 | 2019 | Cognitive      | Rapid automatised naming of objects                 | 0.03331 | 1 | 1324   | A | G | ftp://ftp.ebi.ac.uk/pub/databases/gwas/summary_statistics/TruongDT_30995994_GCST007865/TruongDT_prePMID_RanObj_SummaryStats.txt     | NA        | AMR+AFR         |
| 1136 | 27015805 | 2016 | Mortality      | Parents' age at death                               | 0.036   | 1 | 75244  | G | A | http://www.t2diabetesgenes.org/datasets/results.UKBiobank_9millionSNPs.parents_lifespan.Pilling_et_al_2016_Aging.txt.gz             | T2D-GENES | UKB1 (EUR)      |
| 46   | 28196072 | 2017 | Dermatological | Baldness                                            | 0.03703 | 1 | 52874  | G | A | http://www.psy.ed.ac.uk/ccace/downloads/Hagenaars2017_UKB_MPB_summary_results.zip                                                   | CCACE     | UKB1 (EUR)      |
| 4112 | 29403010 | 2018 | Metabolic      | Sodium                                              | 0.03765 | 1 | 127304 | A | G | http://jenger.riken.jp/en/result                                                                                                    | NA        | EAS             |

|      |             |      |              |                                                                          |         |   |        |   |   |                                                                                                                                                                                                                                                                                                                                                                                                               |       |                    |
|------|-------------|------|--------------|--------------------------------------------------------------------------|---------|---|--------|---|---|---------------------------------------------------------------------------------------------------------------------------------------------------------------------------------------------------------------------------------------------------------------------------------------------------------------------------------------------------------------------------------------------------------------|-------|--------------------|
| 3196 | 31427789    | 2019 | Environment  | Time employed in main current job                                        | 0.038   | 1 | 208904 | G | A | <a href="https://atlas.ctglab.nl/ukb2_sumstats/f.757.0.0_res.EUR.sumstats.MACfilt.txt.gz">https://atlas.ctglab.nl/ukb2_sumstats/f.757.0.0_res.EUR.sumstats.MACfilt.txt.gz</a>                                                                                                                                                                                                                                 | NA    | UKB2 (EUR)         |
| 3740 | 31427789    | 2019 | Psychiatric  | Depression - Depression possibly related to stressful or traumatic event | 0.03829 | 1 | 71568  | G | A | <a href="https://atlas.ctglab.nl/ukb2_sumstats/f.20447.0.0_logistic.EUR.sumstats.MACfilt.txt.gz">https://atlas.ctglab.nl/ukb2_sumstats/f.20447.0.0_logistic.EUR.sumstats.MACfilt.txt.gz</a>                                                                                                                                                                                                                   | NA    | UKB2 (EUR)         |
| 4732 | BioRxiv: ht | 2019 | Neurological | Superior longitudinal fasciculus mode of anisotropy                      | 0.03888 | 1 | 17706  | G | A | <a href="https://www.dropbox.com/s/cg4dbfhtxx3686y/ukbiobank_dti110_pheno370_txt.zip">https://www.dropbox.com/s/cg4dbfhtxx3686y/ukbiobank_dti110_pheno370_txt.zip</a>                                                                                                                                                                                                                                         | NA    | UKB2 (EUR)         |
| 4340 | 30531941    | 2018 | Activities   | Walking (conditioning sex and BMI)                                       | 0.04    | 1 | 91105  | A | G | <a href="https://ora.ox.ac.uk/objects/uuid:ff479f44-bf35-48b9-9e67-e690a2937b22/download_file?file_format=gzip&amp;safe_filename=Doherty-2018-NatureComms-walking-sexBMI.csv.gz&amp;type_of_work=Dataset">https://ora.ox.ac.uk/objects/uuid:ff479f44-bf35-48b9-9e67-e690a2937b22/download_file?file_format=gzip&amp;safe_filename=Doherty-2018-NatureComms-walking-sexBMI.csv.gz&amp;type_of_work=Dataset</a> | NA    | UKB2 (EUR)         |
| 3971 | 29304378    | 2018 | Skeletal     | Total body BMD                                                           | 0.04052 | 1 | 66628  | A | G | <a href="http://www.gefos.org/sites/default/files/METAANALYSIS2016_all_GEFOS.txt.gz">http://www.gefos.org/sites/default/files/METAANALYSIS2016_all_GEFOS.txt.gz</a>                                                                                                                                                                                                                                           | GEFOS | EUR+AFR+Others     |
| 4188 | 31217584    | 2019 | Metabolic    | Fasting insulin                                                          | 0.04064 | 1 | 21551  | G | A | <a href="ftp://ftp.ebi.ac.uk/pub/databases/gwas/summary_statistics/WojcikGL_31217584_GCST008033/WojcikG_PMIID_InFI.adjBMI.invn.gz">ftp://ftp.ebi.ac.uk/pub/databases/gwas/summary_statistics/WojcikGL_31217584_GCST008033/WojcikG_PMIID_InFI.adjBMI.invn.gz</a>                                                                                                                                               | NA    | AMR+AFR+EAS+Others |

|      |             |      |              |                                                                           |         |   |        |   |   |                                                                                                                                                                                                                                                                                                                                                                                                                                 |       |                 |
|------|-------------|------|--------------|---------------------------------------------------------------------------|---------|---|--------|---|---|---------------------------------------------------------------------------------------------------------------------------------------------------------------------------------------------------------------------------------------------------------------------------------------------------------------------------------------------------------------------------------------------------------------------------------|-------|-----------------|
| 4336 | 30531941    | 2018 | Activities   | Overall activity (conditioning sex and BMI)                               | 0.041   | 1 | 91105  | A | G | <a href="https://ora.ox.ac.uk/objects/uuid:ff479f44-bf35-48b9-9e67-e690a2937b22/download_file?file_format=gzip&amp;safe_filename=Doherty-2018-NatureComms-overall-activity-sexBMI.csv.gz&amp;type_of_work=Dataset">https://ora.ox.ac.uk/objects/uuid:ff479f44-bf35-48b9-9e67-e690a2937b22/download_file?file_format=gzip&amp;safe_filename=Doherty-2018-NatureComms-overall-activity-sexBMI.csv.gz&amp;type_of_work=Dataset</a> | NA    | UKB2 (EUR)      |
| 43   | 27818178    | 2016 | Environment  | Social deprivation                                                        | 0.04128 | 1 | 112151 | A | G | <a href="http://www.psy.ed.ac.uk/ccace/downloads/Hill_CB_2016.zip">http://www.psy.ed.ac.uk/ccace/downloads/Hill_CB_2016.zip</a>                                                                                                                                                                                                                                                                                                 | CCACE | UKB1 (EUR)      |
| 4465 | 31676860    | 2019 | Neurological | Left posterior cingulate                                                  | 0.04187 | 1 | 19629  | A | G | <a href="https://www.med.unc.edu/bigs2/data/gwas-summary-statistics/">https://www.med.unc.edu/bigs2/data/gwas-summary-statistics/</a>                                                                                                                                                                                                                                                                                           | NA    | UKB2 (EUR)      |
| 4576 | 31676860    | 2019 | Neurological | Left insula                                                               | 0.04295 | 1 | 21821  | A | G | <a href="https://www.med.unc.edu/bigs2/data/gwas-summary-statistics/">https://www.med.unc.edu/bigs2/data/gwas-summary-statistics/</a>                                                                                                                                                                                                                                                                                           | NA    | UKB2 (EUR meta) |
| 3279 | 31427789    | 2019 | Mortality    | Father's age at death                                                     | 0.04565 | 1 | 283990 | G | A | <a href="https://atlas.ctglab.nl/ukb2_sumstats/f.1807.0.0_res.EUR.sumstats.MA.Cfilt.txt.gz">https://atlas.ctglab.nl/ukb2_sumstats/f.1807.0.0_res.EUR.sumstats.MA.Cfilt.txt.gz</a>                                                                                                                                                                                                                                               | NA    | UKB2 (EUR)      |
| 4727 | BioRxiv: ht | 2019 | Neurological | Posterior thalamic radiation (include optic radiation) mode of anisotropy | 0.04657 | 1 | 17706  | G | A | <a href="https://www.dropbox.com/s/93jfxk23u77dq9q/ukbiobank_dti110_pheno357_txt.zip">https://www.dropbox.com/s/93jfxk23u77dq9q/ukbiobank_dti110_pheno357_txt.zip</a>                                                                                                                                                                                                                                                           | NA    | UKB2 (EUR)      |

|      |          |      |               |                                                                      |         |   |        |   |   |                                                                                                                                             |    |                 |
|------|----------|------|---------------|----------------------------------------------------------------------|---------|---|--------|---|---|---------------------------------------------------------------------------------------------------------------------------------------------|----|-----------------|
| 3839 | 27863252 | 2016 | Immunological | Eosinophil percentage of white cells (two-way meta)                  | 0.0482  | 1 | 132052 | G | A | ftp://ftp.sanger.ac.uk/pub/project/humgen/summary_statistics/human/2017-12-12/hematological_traits/eo_p/eo_p_N172378_ukbb_ukbil_meta.tsv.gz | NA | UKB1 (EUR meta) |
| 4475 | 31676860 | 2019 | Neurological  | Left insula                                                          | 0.04844 | 1 | 19629  | A | G | https://www.med.unc.edu/bigs2/data/gwas-summary-statistics/                                                                                 | NA | UKB2 (EUR)      |
| 4539 | 31676860 | 2019 | Neurological  | Right amygdala                                                       | 0.04853 | 1 | 19629  | A | G | https://www.med.unc.edu/bigs2/data/gwas-summary-statistics/                                                                                 | NA | UKB2 (EUR)      |
| 4175 | 30048462 | 2018 | Skeletal      | Heel bone mineral density                                            | 0.049   | 1 | 394929 | A | G | https://grasp.nhlbi.nih.gov/downloads/ResultsMarch2019/2018_Kim/BMD_v3_SumStats.txt.zip                                                     | NA | UKB2 (EUR)      |
| 3225 | 31427789 | 2019 | Activities    | Hands-free device/speakerphone use with mobile phone in last 3 month | 0.04958 | 1 | 324453 | G | A | https://atlas.ctglab.nl/ukb2_sumstats/f.1130.0_res.EUR.sumstats.MACfilt.txt.gz                                                              | NA | UKB2 (EUR)      |

**Supplementary Table 12.** Full table of PheWAS associations between the meta-analysis lead sequence variant, rs71543507, and phenotypes in the Copenhagen Hospital Biobank Cardiovascular Disease Cohort. Associations are sorted by p-value and adjusted as described in the Methods section. Only associations with an unadjusted p-value<0.05 are shown.

| phecode | phenotype                                       | phenotype-category      | p-value     | p-adj       | log-odds    | standard-error |
|---------|-------------------------------------------------|-------------------------|-------------|-------------|-------------|----------------|
| 721.2   | Spondylosis with myelopathy                     | musculoskeletal         | 0.000111828 | 0.004463374 | 0.00158638  | 0.00041062     |
| 10      | Tuberculosis                                    | infectious diseases     | 0.000388436 | 0.015420347 | 0.00142414  | 0.000401412    |
| 527.1   | Hypertrophy of salivary gland                   | digestive               | 0.001029817 | 0.040376155 | 0.000480217 | 0.000146307    |
|         | Complications following abortion or ectopic and |                         |             |             |             |                |
| 639     | molar pregnancies                               | pregnancy complications | 0.001252016 | 0.048877137 | 0.00104196  | 0.000322913    |
| 634     | Miscarriage; stillbirth                         | pregnancy complications | 0.001261798 | 0.049249692 | 0.00625829  | 0.00194084     |
| 386.21  | Central origin vertigo                          | sense organs            | 0.00195326  | 0.075226831 | 0.000826599 | 0.000266882    |
| 523.1   | Gingivitis                                      | digestive               | 0.002223566 | 0.085192544 | 0.000743042 | 0.000242934    |
| 735     | Acquired foot deformities                       | musculoskeletal         | 0.003087877 | 0.116360562 | 0.00144592  | 0.000488675    |
| 242.2   | Toxic multinodular goiter                       | endocrine/metabolic     | 0.00335112  | 0.125645964 | 0.00170003  | 0.000579515    |
| 374     | Other disorders of eyelids                      | sense organs            | 0.004052938 | 0.149938816 | 0.00110369  | 0.000384025    |
|         | Iron deficiency anemias, unspecified or not due |                         |             |             |             |                |
| 280.1   | to blood loss                                   | hematopoietic           | 0.005277157 | 0.190748237 | 0.00311813  | 0.00111777     |
| 871.3   | Open wound of foot except toe(s) alone          | injuries & poisonings   | 0.006973969 | 0.244167904 | 0.00379958  | 0.00140825     |
| 198.7   | Secondary malignant neoplasm of skin            | neoplasms               | 0.007060411 | 0.246795236 | -0.00092497 | 0.000343346    |
| 535.6   | Duodenitis                                      | digestive               | 0.007530087 | 0.260915672 | 0.00112891  | 0.000422425    |
|         | Infections of genitourinary tract during        |                         |             |             |             |                |
| 647.1   | pregnancy                                       | pregnancy complications | 0.008029713 | 0.275653184 | 0.00160215  | 0.000604399    |
| 366.2   | Senile cataract                                 | sense organs            | 0.008241002 | 0.281799037 | -0.0057525  | 0.0021773      |
| 386.3   | Labyrinthitis                                   | sense organs            | 0.008772432 | 0.29703308  | -0.0007253  | 0.000276749    |
| 433.3   | Cerebral ischemia                               | circulatory system      | 0.00890738  | 0.300851093 | -0.00043247 | 0.000165342    |
| 204.11  | Lymphoid leukemia, acute                        | neoplasms               | 0.009981826 | 0.330536841 | -0.00036596 | 0.000142038    |
|         | Salicylates causing adverse effects in          |                         |             |             |             |                |
| 965.3   | therapeutic use                                 | injuries & poisonings   | 0.009985044 | 0.330623885 | 0.00141228  | 0.000548173    |

|        |                                                   |                         |             |             |             |             |
|--------|---------------------------------------------------|-------------------------|-------------|-------------|-------------|-------------|
| 433.8  | Late effects of cerebrovascular disease           | circulatory system      | 0.010662769 | 0.348710442 | -0.00463535 | 0.00181525  |
| 250.41 | Impaired fasting glucose                          | endocrine/metabolic     | 0.010791703 | 0.352096975 | -0.00062141 | 0.000243748 |
| 300    | Anxiety, phobic and dissociative disorders        | mental disorders        | 0.011309932 | 0.365536191 | -0.00136316 | 0.000538168 |
| 339    | Other headache syndromes                          | neurological            | 0.011878183 | 0.379960242 | -0.0014364  | 0.000570965 |
| 446.9  | Arteritis NOS                                     | circulatory system      | 0.012192422 | 0.387798859 | 0.00052601  | 0.000209856 |
| 198.5  | Secondary malignancy of brain/spine               | neoplasms               | 0.012724479 | 0.4008511   | -0.00114163 | 0.000458232 |
| 250.42 | Other abnormal glucose                            | endocrine/metabolic     | 0.015963937 | 0.47465985  | 0.00142887  | 0.000592957 |
| 722.8  | Postlaminectomy syndrome                          | musculoskeletal         | 0.016389662 | 0.483674727 | 0.000409292 | 0.00017053  |
| 1007   | Injury to blood vessels                           | Unknown                 | 0.018916901 | 0.534165379 | -0.00125355 | 0.00053407  |
| 440.1  | Atherosclerosis of renal artery                   | circulatory system      | 0.02072717  | 0.567338538 | -0.0005449  | 0.000235592 |
| 187.2  | Malignant neoplasm of testis                      | neoplasms               | 0.020738627 | 0.567540976 | 0.000806762 | 0.000348839 |
| 261    | Vitamin deficiency                                | endocrine/metabolic     | 0.020742448 | 0.56760846  | -0.00054778 | 0.000236863 |
| 253.3  | Diabetes insipidus                                | endocrine/metabolic     | 0.021703511 | 0.584261933 | -0.0004211  | 0.000183443 |
|        | Acute upper respiratory infections of multiple or |                         |             |             |             |             |
| 465    | unspecified sites                                 | respiratory             | 0.02214624  | 0.591721601 | 0.00237411  | 0.0010377   |
| 732.1  | Juvenile osteochondrosis                          | musculoskeletal         | 0.0221544   | 0.591857867 | -0.00126603 | 0.000553408 |
| 360.2  | Progressive myopia                                | sense organs            | 0.023685361 | 0.61665301  | 0.000881418 | 0.000389629 |
| 440    | Atherosclerosis                                   | circulatory system      | 0.02394749  | 0.620748502 | -0.00237234 | 0.00105065  |
| 586    | Other disorders of the kidney and ureters         | genitourinary           | 0.023948593 | 0.620765642 | 0.00086145  | 0.000381519 |
| 426.24 | Atrioventricular block, complete                  | circulatory system      | 0.024066337 | 0.622591279 | 0.00206121  | 0.000913629 |
| 251.1  | Hypoglycemia                                      | endocrine/metabolic     | 0.024647337 | 0.631474991 | 0.00200781  | 0.000893596 |
| 634.3  | Ectopic pregnancy                                 | pregnancy complications | 0.026653239 | 0.660606505 | 0.00165294  | 0.000745721 |
| 433.1  | Occlusion and stenosis of precerebral arteries    | circulatory system      | 0.027489067 | 0.672071098 | -0.00173449 | 0.000786797 |
|        | Diseases of the oral soft tissues, excluding      |                         |             |             |             |             |
| 528    | lesions specific for gingiva and tongue           | digestive               | 0.028000772 | 0.678902588 | -0.00078531 | 0.000357402 |
| 446.4  | Wegener's granulomatosis                          | circulatory system      | 0.028904802 | 0.690634228 | -0.00048088 | 0.000220104 |
| 274.2  | Crystal arthropathies                             | endocrine/metabolic     | 0.029415755 | 0.697078922 | -0.00048988 | 0.000224934 |
| 550.5  | Ventral hernia                                    | digestive               | 0.02981261  | 0.70199399  | -0.00250232 | 0.00115178  |
| 306    | Other mental disorder                             | mental disorders        | 0.030285169 | 0.707745292 | -0.00069146 | 0.000319186 |
| 377.1  | Optic atrophy                                     | sense organs            | 0.030423558 | 0.709408976 | -0.00044145 | 0.000203947 |
| 750.21 | Congenital anomalies of intestine                 | congenital anomalies    | 0.031583481 | 0.722995038 | 0.000514749 | 0.000239458 |
| 516.1  | Hemoptysis                                        | respiratory             | 0.031817057 | 0.725654971 | 0.00153271  | 0.000713985 |

|                                            |                     |             |             |             |             |
|--------------------------------------------|---------------------|-------------|-------------|-------------|-------------|
| 343 Infantile cerebral palsy               | neurological        | 0.033898462 | 0.748283936 | 0.000690909 | 0.000325704 |
| 614.52 Vaginitis and vulvovaginitis        | genitourinary       | 0.034459582 | 0.754066133 | -0.00059044 | 0.000279214 |
| 364.5 Corneal dystrophy                    | sense organs        | 0.034707234 | 0.756576744 | -0.00057311 | 0.000271389 |
| 275 Disorders of mineral metabolism        | endocrine/metabolic | 0.036240151 | 0.771569984 | -0.00030239 | 0.000144395 |
| 366.1 Nonsenile Cataract                   | sense organs        | 0.036251001 | 0.771672825 | -0.00077778 | 0.000371413 |
| 701.2 Scar conditions and fibrosis of skin | dermatologic        | 0.036696108 | 0.775853167 | 0.00122573  | 0.00058672  |
| 709.3 Systemic sclerosis                   | dermatologic        | 0.03750939  | 0.783299431 | 0.00049151  | 0.000236282 |
| 446.3 Hypersensitivity angiitis            | circulatory system  | 0.038075008 | 0.788335346 | 0.00030619  | 0.000147629 |
| 245.1 Thyroiditis, acute and subacute      | endocrine/metabolic | 0.039955816 | 0.804273853 | -0.0005751  | 0.000279961 |
| 276.14 Hypopotassemia                      | endocrine/metabolic | 0.04085545  | 0.811477785 | -0.00222464 | 0.00108785  |
| 604 Disorders of penis                     | genitourinary       | 0.04155947  | 0.816934365 | 0.000587    | 0.000288041 |
| 355 Complex regional/central pain syndrome | neurological        | 0.041609261 | 0.817314389 | 0.000376662 | 0.000184873 |
| 300.9 Posttraumatic stress disorder        | mental disorders    | 0.043073484 | 0.828152366 | -0.00088335 | 0.000436654 |
| 302.1 Decreased libido                     | mental disorders    | 0.043192665 | 0.829006405 | 0.000499705 | 0.000247153 |
| 282.9 Other hereditary hemolytic anemias   | hematopoietic       | 0.044227256 | 0.836248363 | 0.00035118  | 0.000174549 |
| 274.21 Chondrocalcinosis                   | endocrine/metabolic | 0.045379531 | 0.843962244 | -0.0008653  | 0.000432408 |
| 709.2 Sicca syndrome                       | dermatologic        | 0.045631001 | 0.845597995 | 0.000757125 | 0.000378793 |
| 550 Abdominal hernia                       | digestive           | 0.045733033 | 0.846256902 | -0.00232994 | 0.00116622  |
| 741.3 Difficulty in walking                | musculoskeletal     | 0.045900773 | 0.8473342   | 0.000473714 | 0.000237296 |
| 535.2 Atrophic gastritis                   | digestive           | 0.046538245 | 0.851361573 | -0.00058992 | 0.000296371 |
| 379.4 Anomalies of pupillary function      | sense organs        | 0.048398288 | 0.862529793 | 0.000304356 | 0.000154194 |

**Supplementary Table 13.** Protein interaction network including *PLPP4* as obtained from the STRING database. Visit STRING at <https://string-db.org/> for more details on column names and method behind the table. *PPAPDC1A* is another name for *PLPP4*.

| node1 | node2    | node1          | node2          | neighborhood       | phylogenetic    |                   | experimentally |              |                             |                        |                          |                    |       |
|-------|----------|----------------|----------------|--------------------|-----------------|-------------------|----------------|--------------|-----------------------------|------------------------|--------------------------|--------------------|-------|
|       |          | _string<br>_id | _string<br>_id | _on_chromos<br>ome | gene_<br>fusion | _cooccurrenc<br>e | homology       | coexpression | _determined_in<br>teraction | database_<br>annotated | automated_<br>textmining | combined<br>_score |       |
|       |          | 9606.E         | 9606.E         |                    |                 |                   |                |              |                             |                        |                          |                    |       |
|       |          | NSP00          | NSP00          |                    |                 |                   |                |              |                             |                        |                          |                    |       |
|       |          | 00029          | 000198         |                    |                 |                   |                |              |                             |                        |                          |                    |       |
| CDS1  | MOGAT2   | 5887           | 801            | 0                  | 0               | 0                 | 0              | 0            | 0                           | 0                      | 0                        | 0.417              | 0.417 |
|       |          | 9606.E         | 9606.E         |                    |                 |                   |                |              |                             |                        |                          |                    |       |
|       |          | NSP00          | NSP00          |                    |                 |                   |                |              |                             |                        |                          |                    |       |
| CDS1  | PLD2     | 00029          | 000263         | 0                  | 0               | 0                 | 0              | 0.063        | 0                           | 0.9                    | 0.3                      | 0.928              |       |
|       |          | 9606.E         | 9606.E         |                    |                 |                   |                |              |                             |                        |                          |                    |       |
|       |          | NSP00          | NSP00          |                    |                 |                   |                |              |                             |                        |                          |                    |       |
| CDS1  | MOGAT1   | 00029          | 000406         | 0                  | 0               | 0                 | 0              | 0            | 0                           | 0                      | 0                        | 0.403              | 0.403 |
|       |          | 9606.E         | 9606.E         |                    |                 |                   |                |              |                             |                        |                          |                    |       |
|       |          | NSP00          | NSP00          |                    |                 |                   |                |              |                             |                        |                          |                    |       |
| CDS1  | DGAT1    | 00029          | 000482         | 0                  | 0               | 0                 | 0              | 0.065        | 0                           | 0                      | 0                        | 0.403              | 0.418 |
|       |          | 9606.E         | 9606.E         |                    |                 |                   |                |              |                             |                        |                          |                    |       |
|       |          | NSP00          | NSP00          |                    |                 |                   |                |              |                             |                        |                          |                    |       |
| CDS1  | CDS2     | 00029          | 000419         | 0                  | 0               | 0                 | 0.975          | 0.062        | 0                           | 0.8                    | 0                        | 0.481              | 0.806 |
|       |          | 9606.E         | 9606.E         |                    |                 |                   |                |              |                             |                        |                          |                    |       |
|       |          | NSP00          | NSP00          |                    |                 |                   |                |              |                             |                        |                          |                    |       |
|       |          | 00029          | 000381         |                    |                 |                   |                |              |                             |                        |                          |                    |       |
| CDS1  | PPAPDC1A | 5887           | 302            | 0                  | 0               | 0                 | 0              | 0.062        | 0                           | 0.9                    | 0.187                    | 0.917              |       |
|       |          | 9606.E         | 9606.E         |                    |                 |                   |                |              |                             |                        |                          |                    |       |
|       |          | NSP00          | NSP00          |                    |                 |                   |                |              |                             |                        |                          |                    |       |
|       |          | 00029          | 000324         |                    |                 |                   |                |              |                             |                        |                          |                    |       |
| CDS1  | MBOAT1   | 5887           | 944            | 0                  | 0               | 0                 | 0              | 0.087        | 0                           | 0.9                    | 0.25                     | 0.925              |       |



|      |        |        |        |   |   |   |       |       |   |     |       |       |  |
|------|--------|--------|--------|---|---|---|-------|-------|---|-----|-------|-------|--|
|      |        | 9606.E | 9606.E |   |   |   |       |       |   |     |       |       |  |
|      |        | NSP00  | NSP00  |   |   |   |       |       |   |     |       |       |  |
|      |        | 00029  | 000342 |   |   |   |       |       |   |     |       |       |  |
| CDS1 | PLD1   | 5887   | 793    | 0 | 0 | 0 | 0     | 0.063 | 0 | 0.9 | 0.387 | 0.937 |  |
|      |        | 9606.E | 9606.E |   |   |   |       |       |   |     |       |       |  |
|      |        | NSP00  | NSP00  |   |   |   |       |       |   |     |       |       |  |
|      |        | 00029  | 000302 |   |   |   |       |       |   |     |       |       |  |
| CDS1 | MBOAT2 | 5887   | 177    | 0 | 0 | 0 | 0     | 0.087 | 0 | 0.9 | 0.447 | 0.945 |  |
|      |        | 9606.E | 9606.E |   |   |   |       |       |   |     |       |       |  |
|      |        | NSP00  | NSP00  |   |   |   |       |       |   |     |       |       |  |
|      |        | 00041  | 000198 |   |   |   |       |       |   |     |       |       |  |
| CDS2 | MOGAT2 | 9879   | 801    | 0 | 0 | 0 | 0     | 0     | 0 | 0   | 0.446 | 0.446 |  |
|      |        | 9606.E | 9606.E |   |   |   |       |       |   |     |       |       |  |
|      |        | NSP00  | NSP00  |   |   |   |       |       |   |     |       |       |  |
|      |        | 00041  | 000263 |   |   |   |       |       |   |     |       |       |  |
| CDS2 | PLD2   | 9879   | 088    | 0 | 0 | 0 | 0     | 0.063 | 0 | 0.9 | 0.215 | 0.92  |  |
|      |        | 9606.E | 9606.E |   |   |   |       |       |   |     |       |       |  |
|      |        | NSP00  | NSP00  |   |   |   |       |       |   |     |       |       |  |
|      |        | 00041  | 000295 |   |   |   |       |       |   |     |       |       |  |
| CDS2 | CDS1   | 9879   | 887    | 0 | 0 | 0 | 0.975 | 0.062 | 0 | 0.8 | 0.481 | 0.806 |  |
|      |        | 9606.E | 9606.E |   |   |   |       |       |   |     |       |       |  |
|      |        | NSP00  | NSP00  |   |   |   |       |       |   |     |       |       |  |
|      |        | 00041  | 000302 |   |   |   |       |       |   |     |       |       |  |
| CDS2 | MBOAT2 | 9879   | 177    | 0 | 0 | 0 | 0     | 0.087 | 0 | 0.9 | 0.386 | 0.939 |  |
|      |        | 9606.E | 9606.E |   |   |   |       |       |   |     |       |       |  |
|      |        | NSP00  | NSP00  |   |   |   |       |       |   |     |       |       |  |
|      |        | 00041  | 000324 |   |   |   |       |       |   |     |       |       |  |
| CDS2 | MBOAT1 | 9879   | 944    | 0 | 0 | 0 | 0     | 0.087 | 0 | 0.9 | 0.25  | 0.925 |  |
|      |        | 9606.E | 9606.E |   |   |   |       |       |   |     |       |       |  |
|      |        | NSP00  | NSP00  |   |   |   |       |       |   |     |       |       |  |
|      |        | 00041  | 000342 |   |   |   |       |       |   |     |       |       |  |
| CDS2 | PLD1   | 9879   | 793    | 0 | 0 | 0 | 0     | 0.063 | 0 | 0.9 | 0.32  | 0.93  |  |

|       |          |        |        |   |   |   |   |       |       |     |       |       |  |
|-------|----------|--------|--------|---|---|---|---|-------|-------|-----|-------|-------|--|
|       |          | 9606.E | 9606.E |   |   |   |   |       |       |     |       |       |  |
|       |          | NSP00  | NSP00  |   |   |   |   |       |       |     |       |       |  |
|       |          | 00041  | 000381 |   |   |   |   |       |       |     |       |       |  |
| CDS2  | PPAPDC1A | 9879   | 302    | 0 | 0 | 0 | 0 | 0.062 | 0     | 0.9 | 0.187 | 0.917 |  |
|       |          | 9606.E | 9606.E |   |   |   |   |       |       |     |       |       |  |
|       |          | NSP00  | NSP00  |   |   |   |   |       |       |     |       |       |  |
|       |          | 00041  | 000406 |   |   |   |   |       |       |     |       |       |  |
| CDS2  | MOGAT1   | 9879   | 674    | 0 | 0 | 0 | 0 | 0     | 0     | 0   | 0.468 | 0.468 |  |
|       |          | 9606.E | 9606.E |   |   |   |   |       |       |     |       |       |  |
|       |          | NSP00  | NSP00  |   |   |   |   |       |       |     |       |       |  |
|       |          | 00048  | 000198 |   |   |   |   |       |       |     |       |       |  |
| DGAT1 | MOGAT2   | 2264   | 801    | 0 | 0 | 0 | 0 | 0.062 | 0.347 | 0.9 | 0.892 | 0.992 |  |
|       |          | 9606.E | 9606.E |   |   |   |   |       |       |     |       |       |  |
|       |          | NSP00  | NSP00  |   |   |   |   |       |       |     |       |       |  |
|       |          | 00048  | 000228 |   |   |   |   |       |       |     |       |       |  |
| DGAT1 | DGAT2    | 2264   | 027    | 0 | 0 | 0 | 0 | 0.064 | 0.347 | 0.8 | 0.948 | 0.992 |  |
|       |          | 9606.E | 9606.E |   |   |   |   |       |       |     |       |       |  |
|       |          | NSP00  | NSP00  |   |   |   |   |       |       |     |       |       |  |
|       |          | 00048  | 000295 |   |   |   |   |       |       |     |       |       |  |
| DGAT1 | CDS1     | 2264   | 887    | 0 | 0 | 0 | 0 | 0.065 | 0     | 0   | 0.403 | 0.418 |  |
|       |          | 9606.E | 9606.E |   |   |   |   |       |       |     |       |       |  |
|       |          | NSP00  | NSP00  |   |   |   |   |       |       |     |       |       |  |
|       |          | 00048  | 000302 |   |   |   |   |       |       |     |       |       |  |
| DGAT1 | MBOAT2   | 2264   | 177    | 0 | 0 | 0 | 0 | 0     | 0     | 0   | 0.839 | 0.839 |  |
|       |          | 9606.E | 9606.E |   |   |   |   |       |       |     |       |       |  |
|       |          | NSP00  | NSP00  |   |   |   |   |       |       |     |       |       |  |
|       |          | 00048  | 000324 |   |   |   |   |       |       |     |       |       |  |
| DGAT1 | MBOAT1   | 2264   | 944    | 0 | 0 | 0 | 0 | 0     | 0     | 0   | 0.672 | 0.672 |  |
|       |          | 9606.E | 9606.E |   |   |   |   |       |       |     |       |       |  |
|       |          | NSP00  | NSP00  |   |   |   |   |       |       |     |       |       |  |
|       |          | 00048  | 000381 |   |   |   |   |       |       |     |       |       |  |
| DGAT1 | PPAPDC1A | 2264   | 302    | 0 | 0 | 0 | 0 | 0.062 | 0     | 0.9 | 0.325 | 0.931 |  |

|        |          |        |        |   |   |   |       |       |       |      |       |       |  |
|--------|----------|--------|--------|---|---|---|-------|-------|-------|------|-------|-------|--|
|        |          | 9606.E | 9606.E |   |   |   |       |       |       |      |       |       |  |
|        |          | NSP00  | NSP00  |   |   |   |       |       |       |      |       |       |  |
|        |          | 00048  | 000406 |   |   |   |       |       |       |      |       |       |  |
| DGAT1  | MOGAT1   | 2264   | 674    | 0 | 0 | 0 | 0     | 0.062 | 0.347 | 0.9  | 0.946 | 0.996 |  |
|        |          | 9606.E | 9606.E |   |   |   |       |       |       |      |       |       |  |
|        |          | NSP00  | NSP00  |   |   |   |       |       |       |      |       |       |  |
|        |          | 00022  | 000198 |   |   |   |       |       |       |      |       |       |  |
| DGAT2  | MOGAT2   | 8027   | 801    | 0 | 0 | 0 | 0.937 | 0.049 | 0.152 | 0.9  | 0.91  | 0.917 |  |
|        |          | 9606.E | 9606.E |   |   |   |       |       |       |      |       |       |  |
|        |          | NSP00  | NSP00  |   |   |   |       |       |       |      |       |       |  |
|        |          | 00022  | 000302 |   |   |   |       |       |       |      |       |       |  |
| DGAT2  | MBOAT2   | 8027   | 177    | 0 | 0 | 0 | 0     | 0.054 | 0     | 0    | 0.611 | 0.616 |  |
|        |          | 9606.E | 9606.E |   |   |   |       |       |       |      |       |       |  |
|        |          | NSP00  | NSP00  |   |   |   |       |       |       |      |       |       |  |
|        |          | 00022  | 000406 |   |   |   |       |       |       |      |       |       |  |
| DGAT2  | MOGAT1   | 8027   | 674    | 0 | 0 | 0 | 0.942 | 0.062 | 0.145 | 0.9  | 0.913 | 0.917 |  |
|        |          | 9606.E | 9606.E |   |   |   |       |       |       |      |       |       |  |
|        |          | NSP00  | NSP00  |   |   |   |       |       |       |      |       |       |  |
|        |          | 00022  | 000381 |   |   |   |       |       |       |      |       |       |  |
| DGAT2  | PPAPDC1A | 8027   | 302    | 0 | 0 | 0 | 0     | 0.062 | 0     | 0.9  | 0.274 | 0.926 |  |
|        |          | 9606.E | 9606.E |   |   |   |       |       |       |      |       |       |  |
|        |          | NSP00  | NSP00  |   |   |   |       |       |       |      |       |       |  |
|        |          | 00022  | 000482 |   |   |   |       |       |       |      |       |       |  |
| DGAT2  | DGAT1    | 8027   | 264    | 0 | 0 | 0 | 0     | 0.064 | 0.347 | 0.8  | 0.948 | 0.992 |  |
|        |          | 9606.E | 9606.E |   |   |   |       |       |       |      |       |       |  |
|        |          | NSP00  | NSP00  |   |   |   |       |       |       |      |       |       |  |
|        |          | 00032  | 000263 |   |   |   |       |       |       |      |       |       |  |
| MBOAT1 | PLD2     | 4944   | 088    | 0 | 0 | 0 | 0     | 0.052 | 0     | 0.65 | 0.284 | 0.741 |  |
|        |          | 9606.E | 9606.E |   |   |   |       |       |       |      |       |       |  |
|        |          | NSP00  | NSP00  |   |   |   |       |       |       |      |       |       |  |
|        |          | 00032  | 000295 |   |   |   |       |       |       |      |       |       |  |
| MBOAT1 | CDS1     | 4944   | 887    | 0 | 0 | 0 | 0     | 0.087 | 0     | 0.9  | 0.25  | 0.925 |  |

|        |          |                          |                           |      |     |   |   |   |       |       |       |      |       |       |
|--------|----------|--------------------------|---------------------------|------|-----|---|---|---|-------|-------|-------|------|-------|-------|
| MBOAT1 | MBOAT2   | 9606.E<br>NSP00<br>00032 | 9606.E<br>NSP00<br>000302 | 4944 | 177 | 0 | 0 | 0 | 0.955 | 0     | 0     | 0.8  | 0.653 | 0.805 |
| MBOAT1 | DGAT1    | 9606.E<br>NSP00<br>00032 | 9606.E<br>NSP00<br>000482 | 4944 | 264 | 0 | 0 | 0 | 0     | 0     | 0     | 0    | 0.672 | 0.672 |
| MBOAT1 | PLD1     | 9606.E<br>NSP00<br>00032 | 9606.E<br>NSP00<br>000342 | 4944 | 793 | 0 | 0 | 0 | 0     | 0.052 | 0     | 0.65 | 0.312 | 0.751 |
| MBOAT1 | PPAPDC1A | 9606.E<br>NSP00<br>00032 | 9606.E<br>NSP00<br>000381 | 4944 | 302 | 0 | 0 | 0 | 0     | 0.049 | 0.069 | 0.9  | 0.158 | 0.915 |
| MBOAT1 | CDS2     | 9606.E<br>NSP00<br>00032 | 9606.E<br>NSP00<br>000419 | 4944 | 879 | 0 | 0 | 0 | 0     | 0.087 | 0     | 0.9  | 0.25  | 0.925 |
| MBOAT2 | MOGAT2   | 9606.E<br>NSP00<br>00030 | 9606.E<br>NSP00<br>000198 | 2177 | 801 | 0 | 0 | 0 | 0     | 0.054 | 0     | 0    | 0.404 | 0.412 |
| MBOAT2 | DGAT2    | 9606.E<br>NSP00<br>00030 | 9606.E<br>NSP00<br>000228 | 2177 | 027 | 0 | 0 | 0 | 0     | 0.054 | 0     | 0    | 0.611 | 0.616 |
| MBOAT2 | PLD2     | 9606.E<br>NSP00<br>00030 | 9606.E<br>NSP00<br>000263 | 2177 | 088 | 0 | 0 | 0 | 0     | 0.052 | 0     | 0.65 | 0.434 | 0.795 |

|        |          |                          |                           |      |     |   |   |   |       |       |       |      |       |       |
|--------|----------|--------------------------|---------------------------|------|-----|---|---|---|-------|-------|-------|------|-------|-------|
| MBOAT2 | CDS1     | 9606.E<br>NSP00<br>00030 | 9606.E<br>NSP00<br>000295 | 2177 | 887 | 0 | 0 | 0 | 0     | 0.087 | 0     | 0.9  | 0.447 | 0.945 |
| MBOAT2 | PLD1     | 9606.E<br>NSP00<br>00030 | 9606.E<br>NSP00<br>000342 | 2177 | 793 | 0 | 0 | 0 | 0     | 0.052 | 0     | 0.65 | 0.329 | 0.757 |
| MBOAT2 | MBOAT1   | 9606.E<br>NSP00<br>00030 | 9606.E<br>NSP00<br>000324 | 2177 | 944 | 0 | 0 | 0 | 0.955 | 0     | 0     | 0.8  | 0.653 | 0.805 |
| MBOAT2 | DGAT1    | 9606.E<br>NSP00<br>00030 | 9606.E<br>NSP00<br>000482 | 2177 | 264 | 0 | 0 | 0 | 0     | 0     | 0     | 0    | 0.839 | 0.839 |
| MBOAT2 | PPAPDC1A | 9606.E<br>NSP00<br>00030 | 9606.E<br>NSP00<br>000381 | 2177 | 302 | 0 | 0 | 0 | 0     | 0.049 | 0.069 | 0.9  | 0.129 | 0.912 |
| MBOAT2 | CDS2     | 9606.E<br>NSP00<br>00030 | 9606.E<br>NSP00<br>000419 | 2177 | 879 | 0 | 0 | 0 | 0     | 0.087 | 0     | 0.9  | 0.386 | 0.939 |
| MOGAT1 | MOGAT2   | 9606.E<br>NSP00<br>00040 | 9606.E<br>NSP00<br>000198 | 6674 | 801 | 0 | 0 | 0 | 0.953 | 0     | 0     | 0.8  | 0.908 | 0.808 |
| MOGAT1 | DGAT2    | 9606.E<br>NSP00<br>00040 | 9606.E<br>NSP00<br>000228 | 6674 | 027 | 0 | 0 | 0 | 0.942 | 0.062 | 0.145 | 0.9  | 0.913 | 0.917 |

|        |          |        |        |   |   |   |       |       |       |     |       |       |  |
|--------|----------|--------|--------|---|---|---|-------|-------|-------|-----|-------|-------|--|
|        |          | 9606.E | 9606.E |   |   |   |       |       |       |     |       |       |  |
|        |          | NSP00  | NSP00  |   |   |   |       |       |       |     |       |       |  |
|        |          | 00040  | 000295 |   |   |   |       |       |       |     |       |       |  |
| MOGAT1 | CDS1     | 6674   | 887    | 0 | 0 | 0 | 0     | 0     | 0     | 0   | 0.403 | 0.403 |  |
|        |          | 9606.E | 9606.E |   |   |   |       |       |       |     |       |       |  |
|        |          | NSP00  | NSP00  |   |   |   |       |       |       |     |       |       |  |
|        |          | 00040  | 000381 |   |   |   |       |       |       |     |       |       |  |
| MOGAT1 | PPAPDC1A | 6674   | 302    | 0 | 0 | 0 | 0     | 0.062 | 0     | 0.9 | 0.249 | 0.923 |  |
|        |          | 9606.E | 9606.E |   |   |   |       |       |       |     |       |       |  |
|        |          | NSP00  | NSP00  |   |   |   |       |       |       |     |       |       |  |
|        |          | 00040  | 000419 |   |   |   |       |       |       |     |       |       |  |
| MOGAT1 | CDS2     | 6674   | 879    | 0 | 0 | 0 | 0     | 0     | 0     | 0   | 0.468 | 0.468 |  |
|        |          | 9606.E | 9606.E |   |   |   |       |       |       |     |       |       |  |
|        |          | NSP00  | NSP00  |   |   |   |       |       |       |     |       |       |  |
|        |          | 00040  | 000482 |   |   |   |       |       |       |     |       |       |  |
| MOGAT1 | DGAT1    | 6674   | 264    | 0 | 0 | 0 | 0     | 0.062 | 0.347 | 0.9 | 0.946 | 0.996 |  |
|        |          | 9606.E | 9606.E |   |   |   |       |       |       |     |       |       |  |
|        |          | NSP00  | NSP00  |   |   |   |       |       |       |     |       |       |  |
|        |          | 00019  | 000302 |   |   |   |       |       |       |     |       |       |  |
| MOGAT2 | MBOAT2   | 8801   | 177    | 0 | 0 | 0 | 0     | 0.054 | 0     | 0   | 0.404 | 0.412 |  |
|        |          | 9606.E | 9606.E |   |   |   |       |       |       |     |       |       |  |
|        |          | NSP00  | NSP00  |   |   |   |       |       |       |     |       |       |  |
|        |          | 00019  | 000295 |   |   |   |       |       |       |     |       |       |  |
| MOGAT2 | CDS1     | 8801   | 887    | 0 | 0 | 0 | 0     | 0     | 0     | 0   | 0.417 | 0.417 |  |
|        |          | 9606.E | 9606.E |   |   |   |       |       |       |     |       |       |  |
|        |          | NSP00  | NSP00  |   |   |   |       |       |       |     |       |       |  |
|        |          | 00019  | 000419 |   |   |   |       |       |       |     |       |       |  |
| MOGAT2 | CDS2     | 8801   | 879    | 0 | 0 | 0 | 0     | 0     | 0     | 0   | 0.446 | 0.446 |  |
|        |          | 9606.E | 9606.E |   |   |   |       |       |       |     |       |       |  |
|        |          | NSP00  | NSP00  |   |   |   |       |       |       |     |       |       |  |
|        |          | 00019  | 000406 |   |   |   |       |       |       |     |       |       |  |
| MOGAT2 | MOGAT1   | 8801   | 674    | 0 | 0 | 0 | 0.953 | 0     | 0     | 0.8 | 0.908 | 0.808 |  |

|        |          |        |        |       |   |   |       |       |       |      |       |       |  |
|--------|----------|--------|--------|-------|---|---|-------|-------|-------|------|-------|-------|--|
|        |          | 9606.E | 9606.E |       |   |   |       |       |       |      |       |       |  |
|        |          | NSP00  | NSP00  |       |   |   |       |       |       |      |       |       |  |
|        |          | 00019  | 000228 |       |   |   |       |       |       |      |       |       |  |
| MOGAT2 | DGAT2    | 8801   | 027    | 0     | 0 | 0 | 0.937 | 0.049 | 0.152 | 0.9  | 0.91  | 0.917 |  |
|        |          | 9606.E | 9606.E |       |   |   |       |       |       |      |       |       |  |
|        |          | NSP00  | NSP00  |       |   |   |       |       |       |      |       |       |  |
|        |          | 00019  | 000381 |       |   |   |       |       |       |      |       |       |  |
| MOGAT2 | PPAPDC1A | 8801   | 302    | 0     | 0 | 0 | 0     | 0.062 | 0     | 0.9  | 0.249 | 0.923 |  |
|        |          | 9606.E | 9606.E |       |   |   |       |       |       |      |       |       |  |
|        |          | NSP00  | NSP00  |       |   |   |       |       |       |      |       |       |  |
|        |          | 00019  | 000482 |       |   |   |       |       |       |      |       |       |  |
| MOGAT2 | DGAT1    | 8801   | 264    | 0     | 0 | 0 | 0     | 0.062 | 0.347 | 0.9  | 0.892 | 0.992 |  |
|        |          | 9606.E | 9606.E |       |   |   |       |       |       |      |       |       |  |
|        |          | NSP00  | NSP00  |       |   |   |       |       |       |      |       |       |  |
|        |          | 00034  | 000263 |       |   |   |       |       |       |      |       |       |  |
| PLD1   | PLD2     | 2793   | 088    | 0     | 0 | 0 | 0.955 | 0     | 0     | 0.8  | 0.836 | 0.807 |  |
|        |          | 9606.E | 9606.E |       |   |   |       |       |       |      |       |       |  |
|        |          | NSP00  | NSP00  |       |   |   |       |       |       |      |       |       |  |
|        |          | 00034  | 000295 |       |   |   |       |       |       |      |       |       |  |
| PLD1   | CDS1     | 2793   | 887    | 0     | 0 | 0 | 0     | 0.063 | 0     | 0.9  | 0.387 | 0.937 |  |
|        |          | 9606.E | 9606.E |       |   |   |       |       |       |      |       |       |  |
|        |          | NSP00  | NSP00  |       |   |   |       |       |       |      |       |       |  |
|        |          | 00034  | 000302 |       |   |   |       |       |       |      |       |       |  |
| PLD1   | MBOAT2   | 2793   | 177    | 0     | 0 | 0 | 0     | 0.052 | 0     | 0.65 | 0.329 | 0.757 |  |
|        |          | 9606.E | 9606.E |       |   |   |       |       |       |      |       |       |  |
|        |          | NSP00  | NSP00  |       |   |   |       |       |       |      |       |       |  |
|        |          | 00034  | 000324 |       |   |   |       |       |       |      |       |       |  |
| PLD1   | MBOAT1   | 2793   | 944    | 0     | 0 | 0 | 0     | 0.052 | 0     | 0.65 | 0.312 | 0.751 |  |
|        |          | 9606.E | 9606.E |       |   |   |       |       |       |      |       |       |  |
|        |          | NSP00  | NSP00  |       |   |   |       |       |       |      |       |       |  |
|        |          | 00034  | 000381 |       |   |   |       |       |       |      |       |       |  |
| PLD1   | PPAPDC1A | 2793   | 302    | 0.049 | 0 | 0 | 0     | 0     | 0.08  | 0.9  | 0.14  | 0.914 |  |

|              |          |        |        |       |   |   |       |       |      |      |       |       |  |
|--------------|----------|--------|--------|-------|---|---|-------|-------|------|------|-------|-------|--|
|              |          | 9606.E | 9606.E |       |   |   |       |       |      |      |       |       |  |
|              |          | NSP00  | NSP00  |       |   |   |       |       |      |      |       |       |  |
|              |          | 00034  | 000419 |       |   |   |       |       |      |      |       |       |  |
| PLD1         | CDS2     | 2793   | 879    | 0     | 0 | 0 | 0     | 0.063 | 0    | 0.9  | 0.32  | 0.93  |  |
|              |          | 9606.E | 9606.E |       |   |   |       |       |      |      |       |       |  |
|              |          | NSP00  | NSP00  |       |   |   |       |       |      |      |       |       |  |
|              |          | 00026  | 000324 |       |   |   |       |       |      |      |       |       |  |
| PLD2         | MBOAT1   | 3088   | 944    | 0     | 0 | 0 | 0     | 0.052 | 0    | 0.65 | 0.284 | 0.741 |  |
|              |          | 9606.E | 9606.E |       |   |   |       |       |      |      |       |       |  |
|              |          | NSP00  | NSP00  |       |   |   |       |       |      |      |       |       |  |
|              |          | 00026  | 000302 |       |   |   |       |       |      |      |       |       |  |
| PLD2         | MBOAT2   | 3088   | 177    | 0     | 0 | 0 | 0     | 0.052 | 0    | 0.65 | 0.434 | 0.795 |  |
|              |          | 9606.E | 9606.E |       |   |   |       |       |      |      |       |       |  |
|              |          | NSP00  | NSP00  |       |   |   |       |       |      |      |       |       |  |
|              |          | 00026  | 000342 |       |   |   |       |       |      |      |       |       |  |
| PLD2         | PLD1     | 3088   | 793    | 0     | 0 | 0 | 0.955 | 0     | 0    | 0.8  | 0.836 | 0.807 |  |
|              |          | 9606.E | 9606.E |       |   |   |       |       |      |      |       |       |  |
|              |          | NSP00  | NSP00  |       |   |   |       |       |      |      |       |       |  |
|              |          | 00026  | 000381 |       |   |   |       |       |      |      |       |       |  |
| PLD2         | PPAPDC1A | 3088   | 302    | 0.049 | 0 | 0 | 0     | 0     | 0.08 | 0.9  | 0.14  | 0.914 |  |
|              |          | 9606.E | 9606.E |       |   |   |       |       |      |      |       |       |  |
|              |          | NSP00  | NSP00  |       |   |   |       |       |      |      |       |       |  |
|              |          | 00026  | 000419 |       |   |   |       |       |      |      |       |       |  |
| PLD2         | CDS2     | 3088   | 879    | 0     | 0 | 0 | 0     | 0.063 | 0    | 0.9  | 0.215 | 0.92  |  |
|              |          | 9606.E | 9606.E |       |   |   |       |       |      |      |       |       |  |
|              |          | NSP00  | NSP00  |       |   |   |       |       |      |      |       |       |  |
|              |          | 00026  | 000295 |       |   |   |       |       |      |      |       |       |  |
| PLD2         | CDS1     | 3088   | 887    | 0     | 0 | 0 | 0     | 0.063 | 0    | 0.9  | 0.3   | 0.928 |  |
|              |          | 9606.E | 9606.E |       |   |   |       |       |      |      |       |       |  |
|              |          | NSP00  | NSP00  |       |   |   |       |       |      |      |       |       |  |
|              |          | 00038  | 000198 |       |   |   |       |       |      |      |       |       |  |
| PPAPDC1<br>A | MOGAT2   | 1302   | 801    | 0     | 0 | 0 | 0     | 0.062 | 0    | 0.9  | 0.249 | 0.923 |  |



|         |        |        |        |       |   |   |   |       |       |     |       |       |  |
|---------|--------|--------|--------|-------|---|---|---|-------|-------|-----|-------|-------|--|
| PPAPDC1 |        | 9606.E | 9606.E |       |   |   |   |       |       |     |       |       |  |
|         |        | NSP00  | NSP00  |       |   |   |   |       |       |     |       |       |  |
|         |        | 00038  | 000228 |       |   |   |   |       |       |     |       |       |  |
| A       | DGAT2  | 1302   | 027    | 0     | 0 | 0 | 0 | 0.062 | 0     | 0.9 | 0.274 | 0.926 |  |
| PPAPDC1 |        | 9606.E | 9606.E |       |   |   |   |       |       |     |       |       |  |
|         |        | NSP00  | NSP00  |       |   |   |   |       |       |     |       |       |  |
|         |        | 00038  | 000263 |       |   |   |   |       |       |     |       |       |  |
| A       | PLD2   | 1302   | 088    | 0.049 | 0 | 0 | 0 | 0     | 0.08  | 0.9 | 0.14  | 0.914 |  |
| PPAPDC1 |        | 9606.E | 9606.E |       |   |   |   |       |       |     |       |       |  |
|         |        | NSP00  | NSP00  |       |   |   |   |       |       |     |       |       |  |
|         |        | 00038  | 000295 |       |   |   |   |       |       |     |       |       |  |
| A       | CDS1   | 1302   | 887    | 0     | 0 | 0 | 0 | 0.062 | 0     | 0.9 | 0.187 | 0.917 |  |
| PPAPDC1 |        | 9606.E | 9606.E |       |   |   |   |       |       |     |       |       |  |
|         |        | NSP00  | NSP00  |       |   |   |   |       |       |     |       |       |  |
|         |        | 00038  | 000302 |       |   |   |   |       |       |     |       |       |  |
| A       | MBOAT2 | 1302   | 177    | 0     | 0 | 0 | 0 | 0.049 | 0.069 | 0.9 | 0.129 | 0.912 |  |
| PPAPDC1 |        | 9606.E | 9606.E |       |   |   |   |       |       |     |       |       |  |
|         |        | NSP00  | NSP00  |       |   |   |   |       |       |     |       |       |  |
|         |        | 00038  | 000324 |       |   |   |   |       |       |     |       |       |  |
| A       | MBOAT1 | 1302   | 944    | 0     | 0 | 0 | 0 | 0.049 | 0.069 | 0.9 | 0.158 | 0.915 |  |
| PPAPDC1 |        | 9606.E | 9606.E |       |   |   |   |       |       |     |       |       |  |
|         |        | NSP00  | NSP00  |       |   |   |   |       |       |     |       |       |  |
|         |        | 00038  | 000342 |       |   |   |   |       |       |     |       |       |  |
| A       | PLD1   | 1302   | 793    | 0.049 | 0 | 0 | 0 | 0     | 0.08  | 0.9 | 0.14  | 0.914 |  |
| PPAPDC1 |        | 9606.E | 9606.E |       |   |   |   |       |       |     |       |       |  |
|         |        | NSP00  | NSP00  |       |   |   |   |       |       |     |       |       |  |
|         |        | 00038  | 000419 |       |   |   |   |       |       |     |       |       |  |
| A       | CDS2   | 1302   | 879    | 0     | 0 | 0 | 0 | 0.062 | 0     | 0.9 | 0.187 | 0.917 |  |
| PPAPDC1 |        | 9606.E | 9606.E |       |   |   |   |       |       |     |       |       |  |
|         |        | NSP00  | NSP00  |       |   |   |   |       |       |     |       |       |  |
|         |        | 00038  | 000406 |       |   |   |   |       |       |     |       |       |  |
| A       | MOGAT1 | 1302   | 674    | 0     | 0 | 0 | 0 | 0.062 | 0     | 0.9 | 0.249 | 0.923 |  |

|         |       |        |        |   |   |   |   |       |   |     |       |       |  |
|---------|-------|--------|--------|---|---|---|---|-------|---|-----|-------|-------|--|
|         |       | 9606.E | 9606.E |   |   |   |   |       |   |     |       |       |  |
|         |       | NSP00  | NSP00  |   |   |   |   |       |   |     |       |       |  |
| PPAPDC1 |       | 00038  | 000482 |   |   |   |   |       |   |     |       |       |  |
| A       | DGAT1 | 1302   | 264    | 0 | 0 | 0 | 0 | 0.062 | 0 | 0.9 | 0.325 | 0.931 |  |

**Supplementary Table 14.** Protein annotations of STRING network nodes in Supplementary Table 14.

| node  | identifier          | annotation                                                                                                                                                                                                                                                                                                                                                                                                                                                                                                                                                                                                             | domain_summary_url                                                                                                                                                                                                  |
|-------|---------------------|------------------------------------------------------------------------------------------------------------------------------------------------------------------------------------------------------------------------------------------------------------------------------------------------------------------------------------------------------------------------------------------------------------------------------------------------------------------------------------------------------------------------------------------------------------------------------------------------------------------------|---------------------------------------------------------------------------------------------------------------------------------------------------------------------------------------------------------------------|
| CDS1  | 9606.ENSP0000295887 | Phosphatidate cytidyltransferase 1; Provides CDP-diacylglycerol, an important precursor for the synthesis of phosphatidylinositol (PtdIns), phosphatidylglycerol, and cardiolipin. Overexpression may amplify cellular signaling responses from cytokines. May also play an important role in the signal transduction mechanism of retina and neural cells                                                                                                                                                                                                                                                             | <a href="https://smart.embl.de/smart/DDvec.cgi?smart=461: Pfam_CTP_transf_1(87 417)+">https://smart.embl.de/smart/DDvec.cgi?smart=461: Pfam_CTP_transf_1(87 417)+</a>                                               |
| CDS2  | 9606.ENSP0000419879 | Phosphatidate cytidyltransferase 2; Provides CDP-diacylglycerol, an important precursor for the synthesis of phosphatidylinositol, phosphatidylglycerol, and cardiolipin                                                                                                                                                                                                                                                                                                                                                                                                                                               | <a href="https://smart.embl.de/smart/DDvec.cgi?smart=445: Pfam_CTP_transf_1(70 400)+">https://smart.embl.de/smart/DDvec.cgi?smart=445: Pfam_CTP_transf_1(70 400)+</a>                                               |
| DGAT1 | 9606.ENSP0000482264 | Diacylglycerol O-acyltransferase 1; Catalyzes the terminal and only committed step in triacylglycerol synthesis by using diacylglycerol and fatty acyl CoA as substrates. In contrast to DGAT2 it is not essential for survival. May be involved in VLDL (very low density lipoprotein) assembly. In liver, plays a role in esterifying exogenous fatty acids to glycerol. Functions as the major acyl-CoA retinol acyltransferase (ARAT) in the skin, where it acts to maintain retinoid homeostasis and prevent retinoid toxicity leading to skin and hair disorders; Belongs to the membrane-bound acyltransf [...] | <a href="https://smart.embl.de/smart/DDvec.cgi?smart=488: TRANS(87 109)+TRANS(129 151)+Pfam_MBOAT(153 474)+">https://smart.embl.de/smart/DDvec.cgi?smart=488: TRANS(87 109)+TRANS(129 151)+Pfam_MBOAT(153 474)+</a> |
| DGAT2 | 9606.ENSP0000228027 | Diacylglycerol O-acyltransferase 2; Essential acyltransferase that catalyzes the terminal and only committed step in triacylglycerol synthesis by using diacylglycerol and fatty acyl CoA as substrates. Required for synthesis and storage of intracellular triglycerides. Probably plays a central role in cytosolic lipid accumulation. In liver, is primarily responsible for incorporating endogenously synthesized fatty acids into triglycerides (By similarity). Functions also as an acyl-CoA retinol acyltransferase (ARAT); Diacylglycerol O-acyltransferase 2 family                                       | <a href="https://smart.embl.de/smart/DDvec.cgi?smart=388: Pfam_DAGAT(92 388)+">https://smart.embl.de/smart/DDvec.cgi?smart=388: Pfam_DAGAT(92 388)+</a>                                                             |

|        |                          |                                                                                                                                                                                                                                                                                                                                                                                                                                                                                                                                                                                                                                   |                                                                                                                                                                                                                                |
|--------|--------------------------|-----------------------------------------------------------------------------------------------------------------------------------------------------------------------------------------------------------------------------------------------------------------------------------------------------------------------------------------------------------------------------------------------------------------------------------------------------------------------------------------------------------------------------------------------------------------------------------------------------------------------------------|--------------------------------------------------------------------------------------------------------------------------------------------------------------------------------------------------------------------------------|
| MBOAT1 | 9606.ENSP0<br>0000324944 | <p>Lysophospholipid acyltransferase 1; Acyltransferase which mediates the conversion of lysophosphatidylserine (1-acyl-2-hydroxy-sn-glycero-3-phospho-L-serine or LPS) into phosphatidylserine (1,2-diacyl-sn-glycero-3-phospho-L-serine or PS) (LPSAT activity). Prefers oleoyl-CoA as the acyl donor.</p> <p>Lysophospholipid acyltransferases (LPLATs) catalyze the reacylation step of the phospholipid remodeling pathway also known as the Lands cycle;</p> <p>Membrane bound O-acyltransferases</p>                                                                                                                        | <p><a href="https://smart.embl.de/smart/DDvec.cgi?smart=495:Pfam_MBOAT(33 439)+TRANS(456 473)+">https://smart.embl.de/smart/DDvec.cgi?smart=495:Pfam_MBOAT(33 439)+TRANS(456 473)+</a></p>                                     |
| MBOAT2 | 9606.ENSP0<br>0000302177 | <p>Lysophospholipid acyltransferase 2; Acyltransferase which mediates the conversion of lysophosphatidylethanolamine (1-acyl-sn-glycero-3-phosphoethanolamine or LPE) into phosphatidylethanolamine (1,2-diacyl-sn-glycero-3-phosphoethanolamine or PE) (LPEAT activity). Catalyzes also the acylation of lysophosphatidic acid (LPA) into phosphatidic acid (PA) (LPAAT activity). Has also a very weak lysophosphatidylcholine acyltransferase (LPCAT activity). Prefers oleoyl-CoA as the acyl donor.</p> <p>Lysophospholipid acyltransferases (LPLATs) catalyze the reacylation step of the phospholipid remodeling [...]</p> | <p><a href="https://smart.embl.de/smart/DDvec.cgi?smart=520:Pfam_MBOAT(23 435)+TRANS(444 463)+">https://smart.embl.de/smart/DDvec.cgi?smart=520:Pfam_MBOAT(23 435)+TRANS(444 463)+</a></p>                                     |
| MOGAT1 | 9606.ENSP0<br>0000406674 | <p>2-acylglycerol O-acyltransferase 1; Catalyzes the formation of diacylglycerol from 2- monoacylglycerol and fatty acyl-CoA. Probably not involved in absorption of dietary fat in the small intestine (By similarity); Belongs to the diacylglycerol acyltransferase family</p>                                                                                                                                                                                                                                                                                                                                                 | <p><a href="https://smart.embl.de/smart/DDvec.cgi?smart=335:Pfam_DAGAT(40 335)+">https://smart.embl.de/smart/DDvec.cgi?smart=335:Pfam_DAGAT(40 335)+</a></p>                                                                   |
| MOGAT2 | 9606.ENSP0<br>0000198801 | <p>2-acylglycerol O-acyltransferase 2; Catalyzes the formation of diacylglycerol from 2- monoacylglycerol and fatty acyl-CoA. Has a preference toward monoacylglycerols containing unsaturated fatty acids in an order of C18:3 &gt; C18:2 &gt; C18:1 &gt; C18:0. Plays a central role in absorption of dietary fat in the small intestine by catalyzing the resynthesis of triacylglycerol in enterocytes.</p> <p>May play a role in diet-induced obesity</p>                                                                                                                                                                    | <p><a href="https://smart.embl.de/smart/DDvec.cgi?smart=334:Pfam_DAGAT(39 334)+">https://smart.embl.de/smart/DDvec.cgi?smart=334:Pfam_DAGAT(39 334)+</a></p>                                                                   |
| PLD1   | 9606.ENSP0<br>0000342793 | <p>Phospholipase D1; Implicated as a critical step in numerous cellular pathways, including signal transduction, membrane trafficking, and the regulation of mitosis. May be involved in the regulation of perinuclear intravesicular membrane traffic (By similarity); Phospholipases</p>                                                                                                                                                                                                                                                                                                                                        | <p><a href="https://smart.embl.de/smart/DDvec.cgi?smart=1074:PX(79 209)+PH(220 330)+PLDc(459 486)+PLDc(891 918)+">https://smart.embl.de/smart/DDvec.cgi?smart=1074:PX(79 209)+PH(220 330)+PLDc(459 486)+PLDc(891 918)+</a></p> |

|          |                          |                                                                                                                                                                                                                                             |                                                                                                                                                                                                                       |
|----------|--------------------------|---------------------------------------------------------------------------------------------------------------------------------------------------------------------------------------------------------------------------------------------|-----------------------------------------------------------------------------------------------------------------------------------------------------------------------------------------------------------------------|
| PLD2     | 9606.ENSP0<br>0000263088 | Phospholipase D2; May have a role in signal-induced cytoskeletal regulation<br>and/or endocytosis; Phospholipases                                                                                                                           | <a href="https://smart.embl.de/smart/DDvec.cgi?smart=933:PX(64 192)+PH(203 313)+PLDc(437 464)+PLDc(751 778)+">https://smart.embl.de/smart/DDvec.cgi?smart=933:PX(64 192)+PH(203 313)+PLDc(437 464)+PLDc(751 778)+</a> |
| PPAPDC1A | 9606.ENSP0<br>0000381302 | Phospholipid phosphatase 4; Displays magnesium-independent phosphatidate<br>phosphatase activity in vitro. Catalyzes the conversion of phosphatidic acid to<br>diacylglycerol; Belongs to the PA-phosphatase related phosphoesterase family | <a href="https://smart.embl.de/smart/DDvec.cgi?smart=271:TRANS(7 24)+TRANS(49 71)+acidPPc(83 222)+">https://smart.embl.de/smart/DDvec.cgi?smart=271:TRANS(7 24)+TRANS(49 71)+acidPPc(83 222)+</a>                     |

**Supplementary Table 15.** Protein interaction network including *ACTR3B* as obtained from the STRING database.

| node1 | node2  | node1<br>_string<br>_id | node2_<br>string_i<br>d | neighborhood_on_<br>chromosome | gene_<br>fusion | phylogenetic_c<br>occurrence | homology | coexpression | experimentally<br>_determined_in<br>teraction | database_<br>annotated | automated_<br>textmining | combined_<br>score |
|-------|--------|-------------------------|-------------------------|--------------------------------|-----------------|------------------------------|----------|--------------|-----------------------------------------------|------------------------|--------------------------|--------------------|
|       |        | 9606.E                  | 9606.E                  |                                |                 |                              |          |              |                                               |                        |                          |                    |
|       |        | NSP00                   | NSP000                  |                                |                 |                              |          |              |                                               |                        |                          |                    |
|       |        | 00049                   | 002230                  |                                |                 |                              |          |              |                                               |                        |                          |                    |
| ACTB  | WASL   | 4750                    | 23                      | 0                              | 0               | 0                            | 0        | 0.046        | 0.492                                         | 0.9                    | 0.63                     | 0.979              |
|       |        | 9606.E                  | 9606.E                  |                                |                 |                              |          |              |                                               |                        |                          |                    |
|       |        | NSP00                   | NSP000                  |                                |                 |                              |          |              |                                               |                        |                          |                    |
|       |        | 00049                   | 002288                  |                                |                 |                              |          |              |                                               |                        |                          |                    |
| ACTB  | ARPC3  | 4750                    | 25                      | 0                              | 0               | 0                            | 0        | 0.336        | 0.405                                         | 0.9                    | 0.297                    | 0.968              |
|       |        | 9606.E                  | 9606.E                  |                                |                 |                              |          |              |                                               |                        |                          |                    |
|       |        | NSP00                   | NSP000                  |                                |                 |                              |          |              |                                               |                        |                          |                    |
|       |        | 00049                   | 002560                  |                                |                 |                              |          |              |                                               |                        |                          |                    |
| ACTB  | ACTR3B | 4750                    | 01                      | 0                              | 0               | 0                            | 0.871    | 0.067        | 0.298                                         | 0.9                    | 0.674                    | 0.975              |
|       |        | 9606.E                  | 9606.E                  |                                |                 |                              |          |              |                                               |                        |                          |                    |
|       |        | NSP00                   | NSP000                  |                                |                 |                              |          |              |                                               |                        |                          |                    |
|       |        | 00049                   | 002629                  |                                |                 |                              |          |              |                                               |                        |                          |                    |
| ACTB  | ARPC1A | 4750                    | 42                      | 0                              | 0               | 0                            | 0        | 0.121        | 0.362                                         | 0.9                    | 0.174                    | 0.947              |
|       |        | 9606.E                  | 9606.E                  |                                |                 |                              |          |              |                                               |                        |                          |                    |
|       |        | NSP00                   | NSP000                  |                                |                 |                              |          |              |                                               |                        |                          |                    |
|       |        | 00049                   | 002947                  |                                |                 |                              |          |              |                                               |                        |                          |                    |
| ACTB  | ARPC5  | 4750                    | 42                      | 0                              | 0               | 0                            | 0        | 0.202        | 0.281                                         | 0.9                    | 0.272                    | 0.952              |
|       |        | 9606.E                  | 9606.E                  |                                |                 |                              |          |              |                                               |                        |                          |                    |
|       |        | NSP00                   | NSP000                  |                                |                 |                              |          |              |                                               |                        |                          |                    |
|       |        | 00049                   | 002956                  |                                |                 |                              |          |              |                                               |                        |                          |                    |
| ACTB  | ARPC2  | 4750                    | 85                      | 0                              | 0               | 0                            | 0        | 0.259        | 0.365                                         | 0.9                    | 0.305                    | 0.962              |
|       |        | 9606.E                  | 9606.E                  |                                |                 |                              |          |              |                                               |                        |                          |                    |
|       |        | NSP00                   | NSP000                  |                                |                 |                              |          |              |                                               |                        |                          |                    |
|       |        | 00049                   | 003453                  |                                |                 |                              |          |              |                                               |                        |                          |                    |
| ACTB  | ARPC5L | 4750                    | 61                      | 0                              | 0               | 0                            | 0        | 0.049        | 0.388                                         | 0.9                    | 0.171                    | 0.945              |

|       |        |        |        |   |   |       |       |       |       |      |       |       |  |
|-------|--------|--------|--------|---|---|-------|-------|-------|-------|------|-------|-------|--|
|       |        | 9606.E | 9606.E |   |   |       |       |       |       |      |       |       |  |
|       |        | NSP00  | NSP000 |   |   |       |       |       |       |      |       |       |  |
|       |        | 00049  | 003658 |   |   |       |       |       |       |      |       |       |  |
| ACTB  | WAS    | 4750   | 91     | 0 | 0 | 0     | 0     | 0.087 | 0.284 | 0.9  | 0.387 | 0.954 |  |
|       |        | 9606.E | 9606.E |   |   |       |       |       |       |      |       |       |  |
|       |        | NSP00  | NSP000 |   |   |       |       |       |       |      |       |       |  |
|       |        | 00049  | 003672 |   |   |       |       |       |       |      |       |       |  |
| ACTB  | ACTR2  | 4750   | 20     | 0 | 0 | 0     | 0.935 | 0.335 | 0.525 | 0.9  | 0.128 | 0.968 |  |
|       |        | 9606.E | 9606.E |   |   |       |       |       |       |      |       |       |  |
|       |        | NSP00  | NSP000 |   |   |       |       |       |       |      |       |       |  |
|       |        | 00049  | 003881 |   |   |       |       |       |       |      |       |       |  |
| ACTB  | ARPC4  | 4750   | 69     | 0 | 0 | 0     | 0     | 0.335 | 0.414 | 0.9  | 0.12  | 0.961 |  |
|       |        | 9606.E | 9606.E |   |   |       |       |       |       |      |       |       |  |
|       |        | NSP00  | NSP000 |   |   |       |       |       |       |      |       |       |  |
|       |        | 00036  | 002230 |   |   |       |       |       |       |      |       |       |  |
| ACTR2 | WASL   | 7220   | 23     | 0 | 0 | 0     | 0     | 0.056 | 0.985 | 0.9  | 0.993 | 0.999 |  |
|       |        | 9606.E | 9606.E |   |   |       |       |       |       |      |       |       |  |
|       |        | NSP00  | NSP000 |   |   |       |       |       |       |      |       |       |  |
|       |        | 00036  | 002288 |   |   |       |       |       |       |      |       |       |  |
| ACTR2 | ARPC3  | 7220   | 25     | 0 | 0 | 0     | 0     | 0.769 | 0.997 | 0.9  | 0.998 | 0.999 |  |
|       |        | 9606.E | 9606.E |   |   |       |       |       |       |      |       |       |  |
|       |        | NSP00  | NSP000 |   |   |       |       |       |       |      |       |       |  |
|       |        | 00036  | 002560 |   |   |       |       |       |       |      |       |       |  |
| ACTR2 | ACTR3B | 7220   | 01     | 0 | 0 | 0.079 | 0.814 | 0.39  | 0.962 | 0.65 | 0.975 | 0.999 |  |
|       |        | 9606.E | 9606.E |   |   |       |       |       |       |      |       |       |  |
|       |        | NSP00  | NSP000 |   |   |       |       |       |       |      |       |       |  |
|       |        | 00036  | 002629 |   |   |       |       |       |       |      |       |       |  |
| ACTR2 | ARPC1A | 7220   | 42     | 0 | 0 | 0     | 0     | 0.112 | 0.995 | 0.72 | 0.949 | 0.999 |  |
|       |        | 9606.E | 9606.E |   |   |       |       |       |       |      |       |       |  |
|       |        | NSP00  | NSP000 |   |   |       |       |       |       |      |       |       |  |
|       |        | 00036  | 002947 |   |   |       |       |       |       |      |       |       |  |
| ACTR2 | ARPC5  | 7220   | 42     | 0 | 0 | 0     | 0     | 0.782 | 0.997 | 0.9  | 0.997 | 0.999 |  |

|        |        |        |        |   |   |   |       |       |       |      |       |       |  |
|--------|--------|--------|--------|---|---|---|-------|-------|-------|------|-------|-------|--|
|        |        | 9606.E | 9606.E |   |   |   |       |       |       |      |       |       |  |
|        |        | NSP00  | NSP000 |   |   |   |       |       |       |      |       |       |  |
|        |        | 00036  | 002956 |   |   |   |       |       |       |      |       |       |  |
| ACTR2  | ARPC2  | 7220   | 85     | 0 | 0 | 0 | 0     | 0.759 | 0.995 | 0.9  | 0.997 | 0.999 |  |
|        |        | 9606.E | 9606.E |   |   |   |       |       |       |      |       |       |  |
|        |        | NSP00  | NSP000 |   |   |   |       |       |       |      |       |       |  |
|        |        | 00036  | 003453 |   |   |   |       |       |       |      |       |       |  |
| ACTR2  | ARPC5L | 7220   | 61     | 0 | 0 | 0 | 0     | 0.118 | 0.997 | 0.54 | 0.647 | 0.999 |  |
|        |        | 9606.E | 9606.E |   |   |   |       |       |       |      |       |       |  |
|        |        | NSP00  | NSP000 |   |   |   |       |       |       |      |       |       |  |
|        |        | 00036  | 003658 |   |   |   |       |       |       |      |       |       |  |
| ACTR2  | WAS    | 7220   | 91     | 0 | 0 | 0 | 0     | 0.056 | 0.861 | 0.9  | 0.997 | 0.999 |  |
|        |        | 9606.E | 9606.E |   |   |   |       |       |       |      |       |       |  |
|        |        | NSP00  | NSP000 |   |   |   |       |       |       |      |       |       |  |
|        |        | 00036  | 004947 |   |   |   |       |       |       |      |       |       |  |
| ACTR2  | ACTB   | 7220   | 50     | 0 | 0 | 0 | 0.935 | 0.335 | 0.525 | 0.9  | 0.128 | 0.968 |  |
|        |        | 9606.E | 9606.E |   |   |   |       |       |       |      |       |       |  |
|        |        | NSP00  | NSP000 |   |   |   |       |       |       |      |       |       |  |
|        |        | 00036  | 003881 |   |   |   |       |       |       |      |       |       |  |
| ACTR2  | ARPC4  | 7220   | 69     | 0 | 0 | 0 | 0     | 0.779 | 0.997 | 0.9  | 0.809 | 0.999 |  |
|        |        | 9606.E | 9606.E |   |   |   |       |       |       |      |       |       |  |
|        |        | NSP00  | NSP000 |   |   |   |       |       |       |      |       |       |  |
|        |        | 00025  | 002230 |   |   |   |       |       |       |      |       |       |  |
| ACTR3B | WASL   | 6001   | 23     | 0 | 0 | 0 | 0     | 0.05  | 0.52  | 0.9  | 0.446 | 0.971 |  |
|        |        | 9606.E | 9606.E |   |   |   |       |       |       |      |       |       |  |
|        |        | NSP00  | NSP000 |   |   |   |       |       |       |      |       |       |  |
|        |        | 00025  | 002288 |   |   |   |       |       |       |      |       |       |  |
| ACTR3B | ARPC3  | 6001   | 25     | 0 | 0 | 0 | 0     | 0.053 | 0.97  | 0    | 0.69  | 0.99  |  |
|        |        | 9606.E | 9606.E |   |   |   |       |       |       |      |       |       |  |
|        |        | NSP00  | NSP000 |   |   |   |       |       |       |      |       |       |  |
|        |        | 00025  | 002629 |   |   |   |       |       |       |      |       |       |  |
| ACTR3B | ARPC1A | 6001   | 42     | 0 | 0 | 0 | 0     | 0.269 | 0.915 | 0    | 0.462 | 0.964 |  |



|        |        |        |        |   |   |       |       |       |       |      |       |       |
|--------|--------|--------|--------|---|---|-------|-------|-------|-------|------|-------|-------|
|        |        | 9606.E | 9606.E |   |   |       |       |       |       |      |       |       |
|        |        | NSP00  | NSP000 |   |   |       |       |       |       |      |       |       |
|        |        | 00025  | 004947 |   |   |       |       |       |       |      |       |       |
| ACTR3B | ACTB   | 6001   | 50     | 0 | 0 | 0     | 0.871 | 0.067 | 0.298 | 0.9  | 0.674 | 0.975 |
|        |        | 9606.E | 9606.E |   |   |       |       |       |       |      |       |       |
|        |        | NSP00  | NSP000 |   |   |       |       |       |       |      |       |       |
|        |        | 00025  | 003881 |   |   |       |       |       |       |      |       |       |
| ACTR3B | ARPC4  | 6001   | 69     | 0 | 0 | 0     | 0     | 0.072 | 0.962 | 0    | 0.412 | 0.977 |
|        |        | 9606.E | 9606.E |   |   |       |       |       |       |      |       |       |
|        |        | NSP00  | NSP000 |   |   |       |       |       |       |      |       |       |
|        |        | 00025  | 003658 |   |   |       |       |       |       |      |       |       |
| ACTR3B | WAS    | 6001   | 91     | 0 | 0 | 0     | 0     | 0     | 0.52  | 0.9  | 0.588 | 0.978 |
|        |        | 9606.E | 9606.E |   |   |       |       |       |       |      |       |       |
|        |        | NSP00  | NSP000 |   |   |       |       |       |       |      |       |       |
|        |        | 00025  | 003453 |   |   |       |       |       |       |      |       |       |
| ACTR3B | ARPC5L | 6001   | 61     | 0 | 0 | 0     | 0     | 0.119 | 0.92  | 0    | 0.731 | 0.979 |
|        |        | 9606.E | 9606.E |   |   |       |       |       |       |      |       |       |
|        |        | NSP00  | NSP000 |   |   |       |       |       |       |      |       |       |
|        |        | 00025  | 002947 |   |   |       |       |       |       |      |       |       |
| ACTR3B | ARPC5  | 6001   | 42     | 0 | 0 | 0     | 0     | 0.119 | 0.919 | 0    | 0.736 | 0.979 |
|        |        | 9606.E | 9606.E |   |   |       |       |       |       |      |       |       |
|        |        | NSP00  | NSP000 |   |   |       |       |       |       |      |       |       |
|        |        | 00025  | 002956 |   |   |       |       |       |       |      |       |       |
| ACTR3B | ARPC2  | 6001   | 85     | 0 | 0 | 0     | 0     | 0.188 | 0.927 | 0    | 0.727 | 0.982 |
|        |        | 9606.E | 9606.E |   |   |       |       |       |       |      |       |       |
|        |        | NSP00  | NSP000 |   |   |       |       |       |       |      |       |       |
|        |        | 00025  | 003672 |   |   |       |       |       |       |      |       |       |
| ACTR3B | ACTR2  | 6001   | 20     | 0 | 0 | 0.079 | 0.814 | 0.39  | 0.962 | 0.65 | 0.975 | 0.999 |
|        |        | 9606.E | 9606.E |   |   |       |       |       |       |      |       |       |
|        |        | NSP00  | NSP000 |   |   |       |       |       |       |      |       |       |
|        |        | 00026  | 002230 |   |   |       |       |       |       |      |       |       |
| ARPC1A | WASL   | 2942   | 23     | 0 | 0 | 0     | 0     | 0.063 | 0.405 | 0.9  | 0.697 | 0.98  |

|        |        |        |        |   |   |   |   |       |       |      |       |       |
|--------|--------|--------|--------|---|---|---|---|-------|-------|------|-------|-------|
|        |        | 9606.E | 9606.E |   |   |   |   |       |       |      |       |       |
|        |        | NSP00  | NSP000 |   |   |   |   |       |       |      |       |       |
|        |        | 00026  | 002288 |   |   |   |   |       |       |      |       |       |
| ARPC1A | ARPC3  | 2942   | 25     | 0 | 0 | 0 | 0 | 0.147 | 0.995 | 0.9  | 0.955 | 0.999 |
|        |        | 9606.E | 9606.E |   |   |   |   |       |       |      |       |       |
|        |        | NSP00  | NSP000 |   |   |   |   |       |       |      |       |       |
|        |        | 00026  | 002560 |   |   |   |   |       |       |      |       |       |
| ARPC1A | ACTR3B | 2942   | 01     | 0 | 0 | 0 | 0 | 0.269 | 0.915 | 0    | 0.462 | 0.964 |
|        |        | 9606.E | 9606.E |   |   |   |   |       |       |      |       |       |
|        |        | NSP00  | NSP000 |   |   |   |   |       |       |      |       |       |
|        |        | 00026  | 004947 |   |   |   |   |       |       |      |       |       |
| ARPC1A | ACTB   | 2942   | 50     | 0 | 0 | 0 | 0 | 0.121 | 0.362 | 0.9  | 0.174 | 0.947 |
|        |        | 9606.E | 9606.E |   |   |   |   |       |       |      |       |       |
|        |        | NSP00  | NSP000 |   |   |   |   |       |       |      |       |       |
|        |        | 00026  | 003658 |   |   |   |   |       |       |      |       |       |
| ARPC1A | WAS    | 2942   | 91     | 0 | 0 | 0 | 0 | 0.042 | 0.405 | 0.9  | 0.48  | 0.966 |
|        |        | 9606.E | 9606.E |   |   |   |   |       |       |      |       |       |
|        |        | NSP00  | NSP000 |   |   |   |   |       |       |      |       |       |
|        |        | 00026  | 003672 |   |   |   |   |       |       |      |       |       |
| ARPC1A | ACTR2  | 2942   | 20     | 0 | 0 | 0 | 0 | 0.112 | 0.995 | 0.72 | 0.949 | 0.999 |
|        |        | 9606.E | 9606.E |   |   |   |   |       |       |      |       |       |
|        |        | NSP00  | NSP000 |   |   |   |   |       |       |      |       |       |
|        |        | 00026  | 002947 |   |   |   |   |       |       |      |       |       |
| ARPC1A | ARPC5  | 2942   | 42     | 0 | 0 | 0 | 0 | 0.062 | 0.992 | 0.9  | 0.893 | 0.999 |
|        |        | 9606.E | 9606.E |   |   |   |   |       |       |      |       |       |
|        |        | NSP00  | NSP000 |   |   |   |   |       |       |      |       |       |
|        |        | 00026  | 003881 |   |   |   |   |       |       |      |       |       |
| ARPC1A | ARPC4  | 2942   | 69     | 0 | 0 | 0 | 0 | 0.118 | 0.994 | 0.9  | 0.336 | 0.999 |
|        |        | 9606.E | 9606.E |   |   |   |   |       |       |      |       |       |
|        |        | NSP00  | NSP000 |   |   |   |   |       |       |      |       |       |
|        |        | 00026  | 003453 |   |   |   |   |       |       |      |       |       |
| ARPC1A | ARPC5L | 2942   | 61     | 0 | 0 | 0 | 0 | 0.056 | 0.953 | 0.9  | 0.865 | 0.999 |

|        |        |        |        |   |   |   |   |       |       |     |       |       |  |
|--------|--------|--------|--------|---|---|---|---|-------|-------|-----|-------|-------|--|
|        |        | 9606.E | 9606.E |   |   |   |   |       |       |     |       |       |  |
|        |        | NSP00  | NSP000 |   |   |   |   |       |       |     |       |       |  |
|        |        | 00026  | 002956 |   |   |   |   |       |       |     |       |       |  |
| ARPC1A | ARPC2  | 2942   | 85     | 0 | 0 | 0 | 0 | 0.106 | 0.992 | 0.9 | 0.935 | 0.999 |  |
|        |        | 9606.E | 9606.E |   |   |   |   |       |       |     |       |       |  |
|        |        | NSP00  | NSP000 |   |   |   |   |       |       |     |       |       |  |
|        |        | 00029  | 002230 |   |   |   |   |       |       |     |       |       |  |
| ARPC2  | WASL   | 5685   | 23     | 0 | 0 | 0 | 0 | 0     | 0.91  | 0.9 | 0.848 | 0.998 |  |
|        |        | 9606.E | 9606.E |   |   |   |   |       |       |     |       |       |  |
|        |        | NSP00  | NSP000 |   |   |   |   |       |       |     |       |       |  |
|        |        | 00029  | 002288 |   |   |   |   |       |       |     |       |       |  |
| ARPC2  | ARPC3  | 5685   | 25     | 0 | 0 | 0 | 0 | 0.829 | 0.997 | 0.9 | 0.999 | 0.999 |  |
|        |        | 9606.E | 9606.E |   |   |   |   |       |       |     |       |       |  |
|        |        | NSP00  | NSP000 |   |   |   |   |       |       |     |       |       |  |
|        |        | 00029  | 002560 |   |   |   |   |       |       |     |       |       |  |
| ARPC2  | ACTR3B | 5685   | 01     | 0 | 0 | 0 | 0 | 0.188 | 0.927 | 0   | 0.727 | 0.982 |  |
|        |        | 9606.E | 9606.E |   |   |   |   |       |       |     |       |       |  |
|        |        | NSP00  | NSP000 |   |   |   |   |       |       |     |       |       |  |
|        |        | 00029  | 002629 |   |   |   |   |       |       |     |       |       |  |
| ARPC2  | ARPC1A | 5685   | 42     | 0 | 0 | 0 | 0 | 0.106 | 0.992 | 0.9 | 0.935 | 0.999 |  |
|        |        | 9606.E | 9606.E |   |   |   |   |       |       |     |       |       |  |
|        |        | NSP00  | NSP000 |   |   |   |   |       |       |     |       |       |  |
|        |        | 00029  | 002947 |   |   |   |   |       |       |     |       |       |  |
| ARPC2  | ARPC5  | 5685   | 42     | 0 | 0 | 0 | 0 | 0.792 | 0.992 | 0.9 | 0.999 | 0.999 |  |
|        |        | 9606.E | 9606.E |   |   |   |   |       |       |     |       |       |  |
|        |        | NSP00  | NSP000 |   |   |   |   |       |       |     |       |       |  |
|        |        | 00029  | 004947 |   |   |   |   |       |       |     |       |       |  |
| ARPC2  | ACTB   | 5685   | 50     | 0 | 0 | 0 | 0 | 0.259 | 0.365 | 0.9 | 0.305 | 0.962 |  |
|        |        | 9606.E | 9606.E |   |   |   |   |       |       |     |       |       |  |
|        |        | NSP00  | NSP000 |   |   |   |   |       |       |     |       |       |  |
|        |        | 00029  | 003658 |   |   |   |   |       |       |     |       |       |  |
| ARPC2  | WAS    | 5685   | 91     | 0 | 0 | 0 | 0 | 0.06  | 0.573 | 0.9 | 0.944 | 0.997 |  |

|       |        |        |        |   |   |   |   |       |       |     |       |       |  |
|-------|--------|--------|--------|---|---|---|---|-------|-------|-----|-------|-------|--|
|       |        | 9606.E | 9606.E |   |   |   |   |       |       |     |       |       |  |
|       |        | NSP00  | NSP000 |   |   |   |   |       |       |     |       |       |  |
|       |        | 00029  | 003672 |   |   |   |   |       |       |     |       |       |  |
| ARPC2 | ACTR2  | 5685   | 20     | 0 | 0 | 0 | 0 | 0.759 | 0.995 | 0.9 | 0.997 | 0.999 |  |
|       |        | 9606.E | 9606.E |   |   |   |   |       |       |     |       |       |  |
|       |        | NSP00  | NSP000 |   |   |   |   |       |       |     |       |       |  |
|       |        | 00029  | 003453 |   |   |   |   |       |       |     |       |       |  |
| ARPC2 | ARPC5L | 5685   | 61     | 0 | 0 | 0 | 0 | 0.15  | 0.992 | 0.9 | 0.799 | 0.999 |  |
|       |        | 9606.E | 9606.E |   |   |   |   |       |       |     |       |       |  |
|       |        | NSP00  | NSP000 |   |   |   |   |       |       |     |       |       |  |
|       |        | 00029  | 003881 |   |   |   |   |       |       |     |       |       |  |
| ARPC2 | ARPC4  | 5685   | 69     | 0 | 0 | 0 | 0 | 0.784 | 0.997 | 0.9 | 0.884 | 0.999 |  |
|       |        | 9606.E | 9606.E |   |   |   |   |       |       |     |       |       |  |
|       |        | NSP00  | NSP000 |   |   |   |   |       |       |     |       |       |  |
|       |        | 00022  | 002230 |   |   |   |   |       |       |     |       |       |  |
| ARPC3 | WASL   | 8825   | 23     | 0 | 0 | 0 | 0 | 0     | 0.93  | 0.9 | 0.767 | 0.998 |  |
|       |        | 9606.E | 9606.E |   |   |   |   |       |       |     |       |       |  |
|       |        | NSP00  | NSP000 |   |   |   |   |       |       |     |       |       |  |
|       |        | 00022  | 004947 |   |   |   |   |       |       |     |       |       |  |
| ARPC3 | ACTB   | 8825   | 50     | 0 | 0 | 0 | 0 | 0.336 | 0.405 | 0.9 | 0.297 | 0.968 |  |
|       |        | 9606.E | 9606.E |   |   |   |   |       |       |     |       |       |  |
|       |        | NSP00  | NSP000 |   |   |   |   |       |       |     |       |       |  |
|       |        | 00022  | 002560 |   |   |   |   |       |       |     |       |       |  |
| ARPC3 | ACTR3B | 8825   | 01     | 0 | 0 | 0 | 0 | 0.053 | 0.97  | 0   | 0.69  | 0.99  |  |
|       |        | 9606.E | 9606.E |   |   |   |   |       |       |     |       |       |  |
|       |        | NSP00  | NSP000 |   |   |   |   |       |       |     |       |       |  |
|       |        | 00022  | 003658 |   |   |   |   |       |       |     |       |       |  |
| ARPC3 | WAS    | 8825   | 91     | 0 | 0 | 0 | 0 | 0.062 | 0.796 | 0.9 | 0.914 | 0.998 |  |
|       |        | 9606.E | 9606.E |   |   |   |   |       |       |     |       |       |  |
|       |        | NSP00  | NSP000 |   |   |   |   |       |       |     |       |       |  |
|       |        | 00022  | 002956 |   |   |   |   |       |       |     |       |       |  |
| ARPC3 | ARPC2  | 8825   | 85     | 0 | 0 | 0 | 0 | 0.829 | 0.997 | 0.9 | 0.999 | 0.999 |  |

|       |        |        |        |   |   |   |   |       |       |     |       |       |  |
|-------|--------|--------|--------|---|---|---|---|-------|-------|-----|-------|-------|--|
|       |        | 9606.E | 9606.E |   |   |   |   |       |       |     |       |       |  |
|       |        | NSP00  | NSP000 |   |   |   |   |       |       |     |       |       |  |
|       |        | 00022  | 003453 |   |   |   |   |       |       |     |       |       |  |
| ARPC3 | ARPC5L | 8825   | 61     | 0 | 0 | 0 | 0 | 0.211 | 0.997 | 0.9 | 0.816 | 0.999 |  |
|       |        | 9606.E | 9606.E |   |   |   |   |       |       |     |       |       |  |
|       |        | NSP00  | NSP000 |   |   |   |   |       |       |     |       |       |  |
|       |        | 00022  | 003881 |   |   |   |   |       |       |     |       |       |  |
| ARPC3 | ARPC4  | 8825   | 69     | 0 | 0 | 0 | 0 | 0.912 | 0.997 | 0.9 | 0.81  | 0.999 |  |
|       |        | 9606.E | 9606.E |   |   |   |   |       |       |     |       |       |  |
|       |        | NSP00  | NSP000 |   |   |   |   |       |       |     |       |       |  |
|       |        | 00022  | 002947 |   |   |   |   |       |       |     |       |       |  |
| ARPC3 | ARPC5  | 8825   | 42     | 0 | 0 | 0 | 0 | 0.803 | 0.997 | 0.9 | 0.999 | 0.999 |  |
|       |        | 9606.E | 9606.E |   |   |   |   |       |       |     |       |       |  |
|       |        | NSP00  | NSP000 |   |   |   |   |       |       |     |       |       |  |
|       |        | 00022  | 003672 |   |   |   |   |       |       |     |       |       |  |
| ARPC3 | ACTR2  | 8825   | 20     | 0 | 0 | 0 | 0 | 0.769 | 0.997 | 0.9 | 0.998 | 0.999 |  |
|       |        | 9606.E | 9606.E |   |   |   |   |       |       |     |       |       |  |
|       |        | NSP00  | NSP000 |   |   |   |   |       |       |     |       |       |  |
|       |        | 00022  | 002629 |   |   |   |   |       |       |     |       |       |  |
| ARPC3 | ARPC1A | 8825   | 42     | 0 | 0 | 0 | 0 | 0.147 | 0.995 | 0.9 | 0.955 | 0.999 |  |
|       |        | 9606.E | 9606.E |   |   |   |   |       |       |     |       |       |  |
|       |        | NSP00  | NSP000 |   |   |   |   |       |       |     |       |       |  |
|       |        | 00038  | 002230 |   |   |   |   |       |       |     |       |       |  |
| ARPC4 | WASL   | 8169   | 23     | 0 | 0 | 0 | 0 | 0     | 0.934 | 0.9 | 0.262 | 0.994 |  |
|       |        | 9606.E | 9606.E |   |   |   |   |       |       |     |       |       |  |
|       |        | NSP00  | NSP000 |   |   |   |   |       |       |     |       |       |  |
|       |        | 00038  | 002288 |   |   |   |   |       |       |     |       |       |  |
| ARPC4 | ARPC3  | 8169   | 25     | 0 | 0 | 0 | 0 | 0.912 | 0.997 | 0.9 | 0.81  | 0.999 |  |
|       |        | 9606.E | 9606.E |   |   |   |   |       |       |     |       |       |  |
|       |        | NSP00  | NSP000 |   |   |   |   |       |       |     |       |       |  |
|       |        | 00038  | 002560 |   |   |   |   |       |       |     |       |       |  |
| ARPC4 | ACTR3B | 8169   | 01     | 0 | 0 | 0 | 0 | 0.072 | 0.962 | 0   | 0.412 | 0.977 |  |

|       |        |        |        |   |   |   |   |       |       |     |       |       |  |
|-------|--------|--------|--------|---|---|---|---|-------|-------|-----|-------|-------|--|
|       |        | 9606.E | 9606.E |   |   |   |   |       |       |     |       |       |  |
|       |        | NSP00  | NSP000 |   |   |   |   |       |       |     |       |       |  |
|       |        | 00038  | 002629 |   |   |   |   |       |       |     |       |       |  |
| ARPC4 | ARPC1A | 8169   | 42     | 0 | 0 | 0 | 0 | 0.118 | 0.994 | 0.9 | 0.336 | 0.999 |  |
|       |        | 9606.E | 9606.E |   |   |   |   |       |       |     |       |       |  |
|       |        | NSP00  | NSP000 |   |   |   |   |       |       |     |       |       |  |
|       |        | 00038  | 002947 |   |   |   |   |       |       |     |       |       |  |
| ARPC4 | ARPC5  | 8169   | 42     | 0 | 0 | 0 | 0 | 0.786 | 0.997 | 0.9 | 0.845 | 0.999 |  |
|       |        | 9606.E | 9606.E |   |   |   |   |       |       |     |       |       |  |
|       |        | NSP00  | NSP000 |   |   |   |   |       |       |     |       |       |  |
|       |        | 00038  | 002956 |   |   |   |   |       |       |     |       |       |  |
| ARPC4 | ARPC2  | 8169   | 85     | 0 | 0 | 0 | 0 | 0.784 | 0.997 | 0.9 | 0.884 | 0.999 |  |
|       |        | 9606.E | 9606.E |   |   |   |   |       |       |     |       |       |  |
|       |        | NSP00  | NSP000 |   |   |   |   |       |       |     |       |       |  |
|       |        | 00038  | 003453 |   |   |   |   |       |       |     |       |       |  |
| ARPC4 | ARPC5L | 8169   | 61     | 0 | 0 | 0 | 0 | 0.255 | 0.997 | 0.9 | 0.349 | 0.999 |  |
|       |        | 9606.E | 9606.E |   |   |   |   |       |       |     |       |       |  |
|       |        | NSP00  | NSP000 |   |   |   |   |       |       |     |       |       |  |
|       |        | 00038  | 003658 |   |   |   |   |       |       |     |       |       |  |
| ARPC4 | WAS    | 8169   | 91     | 0 | 0 | 0 | 0 | 0.061 | 0.566 | 0.9 | 0.591 | 0.981 |  |
|       |        | 9606.E | 9606.E |   |   |   |   |       |       |     |       |       |  |
|       |        | NSP00  | NSP000 |   |   |   |   |       |       |     |       |       |  |
|       |        | 00038  | 003672 |   |   |   |   |       |       |     |       |       |  |
| ARPC4 | ACTR2  | 8169   | 20     | 0 | 0 | 0 | 0 | 0.779 | 0.997 | 0.9 | 0.809 | 0.999 |  |
|       |        | 9606.E | 9606.E |   |   |   |   |       |       |     |       |       |  |
|       |        | NSP00  | NSP000 |   |   |   |   |       |       |     |       |       |  |
|       |        | 00038  | 004947 |   |   |   |   |       |       |     |       |       |  |
| ARPC4 | ACTB   | 8169   | 50     | 0 | 0 | 0 | 0 | 0.335 | 0.414 | 0.9 | 0.12  | 0.961 |  |
|       |        | 9606.E | 9606.E |   |   |   |   |       |       |     |       |       |  |
|       |        | NSP00  | NSP000 |   |   |   |   |       |       |     |       |       |  |
|       |        | 00029  | 002230 |   |   |   |   |       |       |     |       |       |  |
| ARPC5 | WASL   | 4742   | 23     | 0 | 0 | 0 | 0 | 0     | 0.853 | 0.9 | 0.577 | 0.993 |  |

|       |        |        |        |   |   |       |       |       |       |     |       |       |  |
|-------|--------|--------|--------|---|---|-------|-------|-------|-------|-----|-------|-------|--|
|       |        | 9606.E | 9606.E |   |   |       |       |       |       |     |       |       |  |
|       |        | NSP00  | NSP000 |   |   |       |       |       |       |     |       |       |  |
|       |        | 00029  | 002288 |   |   |       |       |       |       |     |       |       |  |
| ARPC5 | ARPC3  | 4742   | 25     | 0 | 0 | 0     | 0     | 0.803 | 0.997 | 0.9 | 0.999 | 0.999 |  |
|       |        | 9606.E | 9606.E |   |   |       |       |       |       |     |       |       |  |
|       |        | NSP00  | NSP000 |   |   |       |       |       |       |     |       |       |  |
|       |        | 00029  | 002560 |   |   |       |       |       |       |     |       |       |  |
| ARPC5 | ACTR3B | 4742   | 01     | 0 | 0 | 0     | 0     | 0.119 | 0.919 | 0   | 0.736 | 0.979 |  |
|       |        | 9606.E | 9606.E |   |   |       |       |       |       |     |       |       |  |
|       |        | NSP00  | NSP000 |   |   |       |       |       |       |     |       |       |  |
|       |        | 00029  | 002629 |   |   |       |       |       |       |     |       |       |  |
| ARPC5 | ARPC1A | 4742   | 42     | 0 | 0 | 0     | 0     | 0.062 | 0.992 | 0.9 | 0.893 | 0.999 |  |
|       |        | 9606.E | 9606.E |   |   |       |       |       |       |     |       |       |  |
|       |        | NSP00  | NSP000 |   |   |       |       |       |       |     |       |       |  |
|       |        | 00029  | 003453 |   |   |       |       |       |       |     |       |       |  |
| ARPC5 | ARPC5L | 4742   | 61     | 0 | 0 | 0.057 | 0.967 | 0.089 | 0.447 | 0.9 | 0.062 | 0.947 |  |
|       |        | 9606.E | 9606.E |   |   |       |       |       |       |     |       |       |  |
|       |        | NSP00  | NSP000 |   |   |       |       |       |       |     |       |       |  |
|       |        | 00029  | 004947 |   |   |       |       |       |       |     |       |       |  |
| ARPC5 | ACTB   | 4742   | 50     | 0 | 0 | 0     | 0     | 0.202 | 0.281 | 0.9 | 0.272 | 0.952 |  |
|       |        | 9606.E | 9606.E |   |   |       |       |       |       |     |       |       |  |
|       |        | NSP00  | NSP000 |   |   |       |       |       |       |     |       |       |  |
|       |        | 00029  | 003658 |   |   |       |       |       |       |     |       |       |  |
| ARPC5 | WAS    | 4742   | 91     | 0 | 0 | 0     | 0     | 0.068 | 0.299 | 0.9 | 0.907 | 0.993 |  |
|       |        | 9606.E | 9606.E |   |   |       |       |       |       |     |       |       |  |
|       |        | NSP00  | NSP000 |   |   |       |       |       |       |     |       |       |  |
|       |        | 00029  | 002956 |   |   |       |       |       |       |     |       |       |  |
| ARPC5 | ARPC2  | 4742   | 85     | 0 | 0 | 0     | 0     | 0.792 | 0.992 | 0.9 | 0.999 | 0.999 |  |
|       |        | 9606.E | 9606.E |   |   |       |       |       |       |     |       |       |  |
|       |        | NSP00  | NSP000 |   |   |       |       |       |       |     |       |       |  |
|       |        | 00029  | 003672 |   |   |       |       |       |       |     |       |       |  |
| ARPC5 | ACTR2  | 4742   | 20     | 0 | 0 | 0     | 0     | 0.782 | 0.997 | 0.9 | 0.997 | 0.999 |  |

|        |        |        |        |   |   |       |       |       |       |     |       |       |  |
|--------|--------|--------|--------|---|---|-------|-------|-------|-------|-----|-------|-------|--|
|        |        | 9606.E | 9606.E |   |   |       |       |       |       |     |       |       |  |
|        |        | NSP00  | NSP000 |   |   |       |       |       |       |     |       |       |  |
|        |        | 00029  | 003881 |   |   |       |       |       |       |     |       |       |  |
| ARPC5  | ARPC4  | 4742   | 69     | 0 | 0 | 0     | 0     | 0.786 | 0.997 | 0.9 | 0.845 | 0.999 |  |
|        |        | 9606.E | 9606.E |   |   |       |       |       |       |     |       |       |  |
|        |        | NSP00  | NSP000 |   |   |       |       |       |       |     |       |       |  |
|        |        | 00034  | 002230 |   |   |       |       |       |       |     |       |       |  |
| ARPC5L | WASL   | 5361   | 23     | 0 | 0 | 0     | 0     | 0.047 | 0.299 | 0.9 | 0.481 | 0.96  |  |
|        |        | 9606.E | 9606.E |   |   |       |       |       |       |     |       |       |  |
|        |        | NSP00  | NSP000 |   |   |       |       |       |       |     |       |       |  |
|        |        | 00034  | 002288 |   |   |       |       |       |       |     |       |       |  |
| ARPC5L | ARPC3  | 5361   | 25     | 0 | 0 | 0     | 0     | 0.211 | 0.997 | 0.9 | 0.816 | 0.999 |  |
|        |        | 9606.E | 9606.E |   |   |       |       |       |       |     |       |       |  |
|        |        | NSP00  | NSP000 |   |   |       |       |       |       |     |       |       |  |
|        |        | 00034  | 002560 |   |   |       |       |       |       |     |       |       |  |
| ARPC5L | ACTR3B | 5361   | 01     | 0 | 0 | 0     | 0     | 0.119 | 0.92  | 0   | 0.731 | 0.979 |  |
|        |        | 9606.E | 9606.E |   |   |       |       |       |       |     |       |       |  |
|        |        | NSP00  | NSP000 |   |   |       |       |       |       |     |       |       |  |
|        |        | 00034  | 002629 |   |   |       |       |       |       |     |       |       |  |
| ARPC5L | ARPC1A | 5361   | 42     | 0 | 0 | 0     | 0     | 0.056 | 0.953 | 0.9 | 0.865 | 0.999 |  |
|        |        | 9606.E | 9606.E |   |   |       |       |       |       |     |       |       |  |
|        |        | NSP00  | NSP000 |   |   |       |       |       |       |     |       |       |  |
|        |        | 00034  | 002947 |   |   |       |       |       |       |     |       |       |  |
| ARPC5L | ARPC5  | 5361   | 42     | 0 | 0 | 0.057 | 0.967 | 0.089 | 0.447 | 0.9 | 0.062 | 0.947 |  |
|        |        | 9606.E | 9606.E |   |   |       |       |       |       |     |       |       |  |
|        |        | NSP00  | NSP000 |   |   |       |       |       |       |     |       |       |  |
|        |        | 00034  | 002956 |   |   |       |       |       |       |     |       |       |  |
| ARPC5L | ARPC2  | 5361   | 85     | 0 | 0 | 0     | 0     | 0.15  | 0.992 | 0.9 | 0.799 | 0.999 |  |
|        |        | 9606.E | 9606.E |   |   |       |       |       |       |     |       |       |  |
|        |        | NSP00  | NSP000 |   |   |       |       |       |       |     |       |       |  |
|        |        | 00034  | 004947 |   |   |       |       |       |       |     |       |       |  |
| ARPC5L | ACTB   | 5361   | 50     | 0 | 0 | 0     | 0     | 0.049 | 0.388 | 0.9 | 0.171 | 0.945 |  |



|        |        |        |        |   |   |       |       |       |       |      |       |       |  |
|--------|--------|--------|--------|---|---|-------|-------|-------|-------|------|-------|-------|--|
|        |        | 9606.E | 9606.E |   |   |       |       |       |       |      |       |       |  |
|        |        | NSP00  | NSP000 |   |   |       |       |       |       |      |       |       |  |
|        |        | 00034  | 003658 |   |   |       |       |       |       |      |       |       |  |
| ARPC5L | WAS    | 5361   | 91     | 0 | 0 | 0     | 0     | 0.055 | 0.299 | 0.9  | 0.403 | 0.955 |  |
|        |        | 9606.E | 9606.E |   |   |       |       |       |       |      |       |       |  |
|        |        | NSP00  | NSP000 |   |   |       |       |       |       |      |       |       |  |
|        |        | 00034  | 003672 |   |   |       |       |       |       |      |       |       |  |
| ARPC5L | ACTR2  | 5361   | 20     | 0 | 0 | 0     | 0     | 0.118 | 0.997 | 0.54 | 0.647 | 0.999 |  |
|        |        | 9606.E | 9606.E |   |   |       |       |       |       |      |       |       |  |
|        |        | NSP00  | NSP000 |   |   |       |       |       |       |      |       |       |  |
|        |        | 00034  | 003881 |   |   |       |       |       |       |      |       |       |  |
| ARPC5L | ARPC4  | 5361   | 69     | 0 | 0 | 0     | 0     | 0.255 | 0.997 | 0.9  | 0.349 | 0.999 |  |
|        |        | 9606.E | 9606.E |   |   |       |       |       |       |      |       |       |  |
|        |        | NSP00  | NSP000 |   |   |       |       |       |       |      |       |       |  |
|        |        | 00036  | 002230 |   |   |       |       |       |       |      |       |       |  |
| WAS    | WASL   | 5891   | 23     | 0 | 0 | 0.075 | 0.922 | 0     | 0     | 0.4  | 0.866 | 0.919 |  |
|        |        | 9606.E | 9606.E |   |   |       |       |       |       |      |       |       |  |
|        |        | NSP00  | NSP000 |   |   |       |       |       |       |      |       |       |  |
|        |        | 00036  | 002288 |   |   |       |       |       |       |      |       |       |  |
| WAS    | ARPC3  | 5891   | 25     | 0 | 0 | 0     | 0     | 0.062 | 0.796 | 0.9  | 0.914 | 0.998 |  |
|        |        | 9606.E | 9606.E |   |   |       |       |       |       |      |       |       |  |
|        |        | NSP00  | NSP000 |   |   |       |       |       |       |      |       |       |  |
|        |        | 00036  | 002560 |   |   |       |       |       |       |      |       |       |  |
| WAS    | ACTR3B | 5891   | 01     | 0 | 0 | 0     | 0     | 0     | 0.52  | 0.9  | 0.588 | 0.978 |  |
|        |        | 9606.E | 9606.E |   |   |       |       |       |       |      |       |       |  |
|        |        | NSP00  | NSP000 |   |   |       |       |       |       |      |       |       |  |
|        |        | 00036  | 002629 |   |   |       |       |       |       |      |       |       |  |
| WAS    | ARPC1A | 5891   | 42     | 0 | 0 | 0     | 0     | 0.042 | 0.405 | 0.9  | 0.48  | 0.966 |  |
|        |        | 9606.E | 9606.E |   |   |       |       |       |       |      |       |       |  |
|        |        | NSP00  | NSP000 |   |   |       |       |       |       |      |       |       |  |
|        |        | 00036  | 002947 |   |   |       |       |       |       |      |       |       |  |
| WAS    | ARPC5  | 5891   | 42     | 0 | 0 | 0     | 0     | 0.068 | 0.299 | 0.9  | 0.907 | 0.993 |  |

|      |        |        |        |   |   |       |       |       |       |     |       |       |  |
|------|--------|--------|--------|---|---|-------|-------|-------|-------|-----|-------|-------|--|
|      |        | 9606.E | 9606.E |   |   |       |       |       |       |     |       |       |  |
|      |        | NSP00  | NSP000 |   |   |       |       |       |       |     |       |       |  |
|      |        | 00036  | 002956 |   |   |       |       |       |       |     |       |       |  |
| WAS  | ARPC2  | 5891   | 85     | 0 | 0 | 0     | 0     | 0.06  | 0.573 | 0.9 | 0.944 | 0.997 |  |
|      |        | 9606.E | 9606.E |   |   |       |       |       |       |     |       |       |  |
|      |        | NSP00  | NSP000 |   |   |       |       |       |       |     |       |       |  |
|      |        | 00036  | 003453 |   |   |       |       |       |       |     |       |       |  |
| WAS  | ARPC5L | 5891   | 61     | 0 | 0 | 0     | 0     | 0.055 | 0.299 | 0.9 | 0.403 | 0.955 |  |
|      |        | 9606.E | 9606.E |   |   |       |       |       |       |     |       |       |  |
|      |        | NSP00  | NSP000 |   |   |       |       |       |       |     |       |       |  |
|      |        | 00036  | 004947 |   |   |       |       |       |       |     |       |       |  |
| WAS  | ACTB   | 5891   | 50     | 0 | 0 | 0     | 0     | 0.087 | 0.284 | 0.9 | 0.387 | 0.954 |  |
|      |        | 9606.E | 9606.E |   |   |       |       |       |       |     |       |       |  |
|      |        | NSP00  | NSP000 |   |   |       |       |       |       |     |       |       |  |
|      |        | 00036  | 003881 |   |   |       |       |       |       |     |       |       |  |
| WAS  | ARPC4  | 5891   | 69     | 0 | 0 | 0     | 0     | 0.061 | 0.566 | 0.9 | 0.591 | 0.981 |  |
|      |        | 9606.E | 9606.E |   |   |       |       |       |       |     |       |       |  |
|      |        | NSP00  | NSP000 |   |   |       |       |       |       |     |       |       |  |
|      |        | 00036  | 003672 |   |   |       |       |       |       |     |       |       |  |
| WAS  | ACTR2  | 5891   | 20     | 0 | 0 | 0     | 0     | 0.056 | 0.861 | 0.9 | 0.997 | 0.999 |  |
|      |        | 9606.E | 9606.E |   |   |       |       |       |       |     |       |       |  |
|      |        | NSP00  | NSP000 |   |   |       |       |       |       |     |       |       |  |
|      |        | 00022  | 003658 |   |   |       |       |       |       |     |       |       |  |
| WASL | WAS    | 3023   | 91     | 0 | 0 | 0.075 | 0.922 | 0     | 0     | 0.4 | 0.866 | 0.919 |  |
|      |        | 9606.E | 9606.E |   |   |       |       |       |       |     |       |       |  |
|      |        | NSP00  | NSP000 |   |   |       |       |       |       |     |       |       |  |
|      |        | 00022  | 003453 |   |   |       |       |       |       |     |       |       |  |
| WASL | ARPC5L | 3023   | 61     | 0 | 0 | 0     | 0     | 0.047 | 0.299 | 0.9 | 0.481 | 0.96  |  |
|      |        | 9606.E | 9606.E |   |   |       |       |       |       |     |       |       |  |
|      |        | NSP00  | NSP000 |   |   |       |       |       |       |     |       |       |  |
|      |        | 00022  | 002560 |   |   |       |       |       |       |     |       |       |  |
| WASL | ACTR3B | 3023   | 01     | 0 | 0 | 0     | 0     | 0.05  | 0.52  | 0.9 | 0.446 | 0.971 |  |

|      |        |        |        |   |   |   |   |       |       |     |       |       |  |
|------|--------|--------|--------|---|---|---|---|-------|-------|-----|-------|-------|--|
|      |        | 9606.E | 9606.E |   |   |   |   |       |       |     |       |       |  |
|      |        | NSP00  | NSP000 |   |   |   |   |       |       |     |       |       |  |
|      |        | 00022  | 004947 |   |   |   |   |       |       |     |       |       |  |
| WASL | ACTB   | 3023   | 50     | 0 | 0 | 0 | 0 | 0.046 | 0.492 | 0.9 | 0.63  | 0.979 |  |
|      |        | 9606.E | 9606.E |   |   |   |   |       |       |     |       |       |  |
|      |        | NSP00  | NSP000 |   |   |   |   |       |       |     |       |       |  |
|      |        | 00022  | 002629 |   |   |   |   |       |       |     |       |       |  |
| WASL | ARPC1A | 3023   | 42     | 0 | 0 | 0 | 0 | 0.063 | 0.405 | 0.9 | 0.697 | 0.98  |  |
|      |        | 9606.E | 9606.E |   |   |   |   |       |       |     |       |       |  |
|      |        | NSP00  | NSP000 |   |   |   |   |       |       |     |       |       |  |
|      |        | 00022  | 002947 |   |   |   |   |       |       |     |       |       |  |
| WASL | ARPC5  | 3023   | 42     | 0 | 0 | 0 | 0 | 0     | 0.853 | 0.9 | 0.577 | 0.993 |  |
|      |        | 9606.E | 9606.E |   |   |   |   |       |       |     |       |       |  |
|      |        | NSP00  | NSP000 |   |   |   |   |       |       |     |       |       |  |
|      |        | 00022  | 003881 |   |   |   |   |       |       |     |       |       |  |
| WASL | ARPC4  | 3023   | 69     | 0 | 0 | 0 | 0 | 0     | 0.934 | 0.9 | 0.262 | 0.994 |  |
|      |        | 9606.E | 9606.E |   |   |   |   |       |       |     |       |       |  |
|      |        | NSP00  | NSP000 |   |   |   |   |       |       |     |       |       |  |
|      |        | 00022  | 002956 |   |   |   |   |       |       |     |       |       |  |
| WASL | ARPC2  | 3023   | 85     | 0 | 0 | 0 | 0 | 0     | 0.91  | 0.9 | 0.848 | 0.998 |  |
|      |        | 9606.E | 9606.E |   |   |   |   |       |       |     |       |       |  |
|      |        | NSP00  | NSP000 |   |   |   |   |       |       |     |       |       |  |
|      |        | 00022  | 002288 |   |   |   |   |       |       |     |       |       |  |
| WASL | ARPC3  | 3023   | 25     | 0 | 0 | 0 | 0 | 0     | 0.93  | 0.9 | 0.767 | 0.998 |  |
|      |        | 9606.E | 9606.E |   |   |   |   |       |       |     |       |       |  |
|      |        | NSP00  | NSP000 |   |   |   |   |       |       |     |       |       |  |
|      |        | 00022  | 003672 |   |   |   |   |       |       |     |       |       |  |
| WASL | ACTR2  | 3023   | 20     | 0 | 0 | 0 | 0 | 0.056 | 0.985 | 0.9 | 0.993 | 0.999 |  |

**Supplementary Table 16.** Protein annotations of STRING network nodes in Supplementary Table 17.

| <b>node</b> | <b>identifier</b>   | <b>annotation</b>                                                                                                                                                                                                                                                                                                                                                                                                                                                                                                                                                                                                      | <b>domain_summary_url</b>                                                                                                                                                                                                                                                         |
|-------------|---------------------|------------------------------------------------------------------------------------------------------------------------------------------------------------------------------------------------------------------------------------------------------------------------------------------------------------------------------------------------------------------------------------------------------------------------------------------------------------------------------------------------------------------------------------------------------------------------------------------------------------------------|-----------------------------------------------------------------------------------------------------------------------------------------------------------------------------------------------------------------------------------------------------------------------------------|
| ACTB        | 9606.ENSP0000494750 | Actin, cytoplasmic 1, N-terminally processed; Actin is a highly conserved protein that polymerizes to produce filaments that form cross-linked networks in the cytoplasm of cells. Actin exists in both monomeric (G-actin) and polymeric (F-actin) forms, both forms playing key functions, such as cell motility and contraction. In addition to their role in the cytoplasmic cytoskeleton, G- and F-actin also localize in the nucleus, and regulate gene transcription and motility and repair of damaged DNA.                                                                                                    | <a href="https://smart.embl.de/smart/DDvec.cgi?smart=375:ACTIN(5 375)+">https://smart.embl.de/smart/DDvec.cgi?smart=375:ACTIN(5 375)+</a>                                                                                                                                         |
| ACTR2       | 9606.ENSP0000367220 | Actin-related protein 2; ATP-binding component of the Arp2/3 complex, a multiprotein complex that mediates actin polymerization upon stimulation by nucleation-promoting factor (NPF). The Arp2/3 complex mediates the formation of branched actin networks in the cytoplasm, providing the force for cell motility. Seems to contact the pointed end of the daughter actin filament. In addition to its role in the cytoplasmic cytoskeleton, the Arp2/3 complex also promotes actin polymerization in the nucleus, thereby regulating gene transcription and repair of damaged DNA. The Arp2/3 complex promote [...] | <a href="https://smart.embl.de/smart/DDvec.cgi?smart=399:ACTIN(6 395)+">https://smart.embl.de/smart/DDvec.cgi?smart=399:ACTIN(6 395)+</a>                                                                                                                                         |
| ACTR3B      | 9606.ENSP0000256001 | Actin-related protein 3B; Plays a role in the organization of the actin cytoskeleton. May function as ATP-binding component of the Arp2/3 complex which is involved in regulation of actin polymerization and together with an activating nucleation-promoting factor (NPF) mediates the formation of branched actin networks. May decrease the metastatic potential of tumors.                                                                                                                                                                                                                                        | <a href="https://smart.embl.de/smart/DDvec.cgi?smart=418:ACTIN(5 413)+">https://smart.embl.de/smart/DDvec.cgi?smart=418:ACTIN(5 413)+</a>                                                                                                                                         |
| ARPC1A      | 9606.ENSP0000262942 | Actin-related protein 2/3 complex subunit 1A; Probably functions as component of the Arp2/3 complex which is involved in regulation of actin polymerization and together with an activating nucleation-promoting factor (NPF) mediates the formation of branched actin networks; Belongs to the WD repeat ARPC1 family.                                                                                                                                                                                                                                                                                                | <a href="https://smart.embl.de/smart/DDvec.cgi?smart=370:WD40(41 80)+WD40(85 124)+WD40(134 170)+WD40(191 232)+WD40(235 273)+WD40(312 356)+">https://smart.embl.de/smart/DDvec.cgi?smart=370:WD40(41 80)+WD40(85 124)+WD40(134 170)+WD40(191 232)+WD40(235 273)+WD40(312 356)+</a> |

|       |                     |                                                                                                                                                                                                                                                                                                                                                                                                                                                                                                                                                                                                                        |                                                                                                                                                             |
|-------|---------------------|------------------------------------------------------------------------------------------------------------------------------------------------------------------------------------------------------------------------------------------------------------------------------------------------------------------------------------------------------------------------------------------------------------------------------------------------------------------------------------------------------------------------------------------------------------------------------------------------------------------------|-------------------------------------------------------------------------------------------------------------------------------------------------------------|
| ARPC2 | 9606.ENSP0000295685 | Actin-related protein 2/3 complex subunit 2; Actin-binding component of the Arp2/3 complex, a multiprotein complex that mediates actin polymerization upon stimulation by nucleation-promoting factor (NPF). The Arp2/3 complex mediates the formation of branched actin networks in the cytoplasm, providing the force for cell motility. Seems to contact the mother actin filament. In addition to its role in the cytoplasmic cytoskeleton, the Arp2/3 complex also promotes actin polymerization in the nucleus, thereby regulating gene transcription and repair of damaged DNA. The Arp2/3 complex promot [...] | <a href="https://smart.embl.de/smart/DDvec.cgi?smart=300: Pfam_P34-Arc(57 284)+">https://smart.embl.de/smart/DDvec.cgi?smart=300: Pfam_P34-Arc(57 284)+</a> |
| ARPC3 | 9606.ENSP0000228825 | Actin-related protein 2/3 complex subunit 3; Component of the Arp2/3 complex, a multiprotein complex that mediates actin polymerization upon stimulation by nucleation-promoting factor (NPF). The Arp2/3 complex mediates the formation of branched actin networks in the cytoplasm, providing the force for cell motility. In addition to its role in the cytoplasmic cytoskeleton, the Arp2/3 complex also promotes actin polymerization in the nucleus, thereby regulating gene transcription and repair of damaged DNA. The Arp2/3 complex promotes homologous recombination (HR) repair in response to DNA [...] | <a href="https://smart.embl.de/smart/DDvec.cgi?smart=178: Pfam_P21-Arc(1 173)+">https://smart.embl.de/smart/DDvec.cgi?smart=178: Pfam_P21-Arc(1 173)+</a>   |
| ARPC4 | 9606.ENSP0000388169 | Actin-related protein 2/3 complex subunit 4; Actin-binding component of the Arp2/3 complex, a multiprotein complex that mediates actin polymerization upon stimulation by nucleation-promoting factor (NPF). The Arp2/3 complex mediates the formation of branched actin networks in the cytoplasm, providing the force for cell motility. In addition to its role in the cytoplasmic cytoskeleton, the Arp2/3 complex also promotes actin polymerization in the nucleus, thereby regulating gene transcription and repair of damaged DNA. The Arp2/3 complex promotes homologous recombination (HR) repair in r [...] | <a href="https://smart.embl.de/smart/DDvec.cgi?smart=187: Pfam_ARPC4(20 186)+">https://smart.embl.de/smart/DDvec.cgi?smart=187: Pfam_ARPC4(20 186)+</a>     |
| ARPC5 | 9606.ENSP0000294742 | Actin-related protein 2/3 complex subunit 5; Component of the Arp2/3 complex, a multiprotein complex that mediates actin polymerization upon stimulation by nucleation-promoting factor (NPF). The Arp2/3 complex mediates the formation of branched actin networks in the cytoplasm, providing the force for cell motility. In addition to its role in the cytoplasmic cytoskeleton, the Arp2/3 complex also promotes actin polymerization in the nucleus, thereby regulating gene transcription and repair of damaged DNA. The Arp2/3 complex promotes homologous recombination (HR) repair in response to DNA [...] | <a href="https://smart.embl.de/smart/DDvec.cgi?smart=154: Pfam_P16-Arc(10 154)+">https://smart.embl.de/smart/DDvec.cgi?smart=154: Pfam_P16-Arc(10 154)+</a> |

|        |                          |                                                                                                                                                                                                                                                                                                                                                                                                                                                                                                                                                                                                                        |                                                                                                                                                                                                                       |
|--------|--------------------------|------------------------------------------------------------------------------------------------------------------------------------------------------------------------------------------------------------------------------------------------------------------------------------------------------------------------------------------------------------------------------------------------------------------------------------------------------------------------------------------------------------------------------------------------------------------------------------------------------------------------|-----------------------------------------------------------------------------------------------------------------------------------------------------------------------------------------------------------------------|
| ARPC5L | 9606.ENSP0<br>0000345361 | Actin-related protein 2/3 complex subunit 5-like protein; May function as component of the Arp2/3 complex which is involved in regulation of actin polymerization and together with an activating nucleation-promoting factor (NPF) mediates the formation of branched actin networks; Belongs to the ARPC5 family.                                                                                                                                                                                                                                                                                                    | <a href="https://smart.embl.de/smart/DDvec.cgi?smart=153:Pfam_P16-Arc(9 153)+">https://smart.embl.de/smart/DDvec.cgi?smart=153:Pfam_P16-Arc(9 153)+</a>                                                               |
| WAS    | 9606.ENSP0<br>0000365891 | Wiskott-Aldrich syndrome protein; Effector protein for Rho-type GTPases that regulates actin filament reorganization via its interaction with the Arp2/3 complex. Important for efficient actin polymerization. Possible regulator of lymphocyte and platelet function. Mediates actin filament reorganization and the formation of actin pedestals upon infection by pathogenic bacteria. In addition to its role in the cytoplasmic cytoskeleton, also promotes actin polymerization in the nucleus, thereby regulating gene transcription and repair of damaged DNA. Promotes homologous recombination (HR) r [...] | <a href="https://smart.embl.de/smart/DDvec.cgi?smart=502:WH1(39 145)+PBD(238 274)+WH2(430 447)+">https://smart.embl.de/smart/DDvec.cgi?smart=502:WH1(39 145)+PBD(238 274)+WH2(430 447)+</a>                           |
| WASL   | 9606.ENSP0<br>0000223023 | Neural Wiskott-Aldrich syndrome protein; Regulates actin polymerization by stimulating the actin- nucleating activity of the Arp2/3 complex. Involved in various processes, such as mitosis and cytokinesis, via its role in the regulation of actin polymerization. Together with CDC42, involved in the extension and maintenance of the formation of thin, actin-rich surface projections called filopodia. In addition to its role in the cytoplasm, also plays a role in the nucleus by regulating gene transcription, probably by promoting nuclear actin polymerization. Binds to HSF1/HSTF1 and forms a [...]  | <a href="https://smart.embl.de/smart/DDvec.cgi?smart=505:WH1(34 138)+PBD(203 239)+WH2(405 422)+WH2(433 450)+">https://smart.embl.de/smart/DDvec.cgi?smart=505:WH1(34 138)+PBD(203 239)+WH2(405 422)+WH2(433 450)+</a> |

**Supplementary Table 17.** Member list of the DBDS Genomic Consortium

| First name     | Surname   | Email                                    | Affiliation 1                                                                                                                              | Affiliation 2                                                                                         |
|----------------|-----------|------------------------------------------|--------------------------------------------------------------------------------------------------------------------------------------------|-------------------------------------------------------------------------------------------------------|
| Karina         | Banasik   | karina.banasik@cpr.ku.dk                 | Novo Nordisk Foundation Center for Protein Research, Faculty of Health and Medical Sciences, University of Copenhagen, Copenhagen, Denmark | Department of Gynecology and Obstetrics, Copenhagen University Hospital Hvidovre, Copenhagen, Denmark |
| Jakob          | Bay       | jabay@regionsjaelland.dk                 | Department of Clinical Immunology, Zealand University Hospital, Køge, Denmark                                                              |                                                                                                       |
| Jens Kjærgaard | Boldsen   | jenbol@rm.dk                             | Department of Clinical Immunology, Aarhus University Hospital, Aarhus, Denmark                                                             |                                                                                                       |
| Thorsten       | Brodersen | thobr@regionsjaelland.dk                 | Department of Clinical Immunology, Zealand University Hospital, Køge, Denmark                                                              |                                                                                                       |
| Søren          | Brunak    | soren.brunak@cpr.ku.dk                   | Novo Nordisk Foundation Center for Protein Research, Faculty of Health and Medical Sciences, University of Copenhagen, Copenhagen, Denmark |                                                                                                       |
| Kristoffer     | Burgdorf  | kristoffer.soelvsten.burgdorf@regionh.dk | Novo Nordisk Foundation Center for Protein Research, Faculty of Health and Medical Sciences, University of Copenhagen, Copenhagen, Denmark |                                                                                                       |
| Mona Ameri     | Chalmer   | mona.ameri.chalmer@regionh.dk            | Danish Headache Center, Department of Neurology, Copenhagen University Hospital, Rigshospitalet-Glostrup, Copenhagen, Denmark              |                                                                                                       |
| Maria          | Didriksen | maria.didriksen@regionh.dk               | Department of Clinical Immunology, Copenhagen University Hospital, Rigshospitalet, Copenhagen, Denmark                                     |                                                                                                       |
| Khoa Manh      | Dinh      | khoadinh@rm.dk                           | Department of Clinical Immunology, Aarhus University Hospital, Aarhus, Denmark                                                             |                                                                                                       |
| Joseph         | Dowsett   | joseph.dowsett@regionh.dk                | Department of Clinical Immunology, Copenhagen University Hospital, Rigshospitalet, Copenhagen, Denmark                                     |                                                                                                       |

|                               |                       |                                      |                                                                                                                                     |                                                                                     |
|-------------------------------|-----------------------|--------------------------------------|-------------------------------------------------------------------------------------------------------------------------------------|-------------------------------------------------------------------------------------|
| Christian                     | Erikstrup             | christian.erikstrup@sk<br>ejby.rm.dk | Department of Clinical Immunology, Aarhus<br>University Hospital, Aarhus, Denmark                                                   | Department of Clinical Medicine, Health, Aarhus<br>University, Aarhus, Denmark      |
| Bjarke                        | Feenstra              | Bjarke Feenstra<br><FEE@ssi.dk>      | Department of Clinical Immunology,<br>Copenhagen University Hospital, Rigshospitalet,<br>Copenhagen, Denmark                        | Department of Epidemiology Research, Statens<br>Serum Institut, Copenhagen, Denmark |
| Frank                         | Geller                | FGE@ssi.dk                           | Department of Clinical Immunology,<br>Copenhagen University Hospital, Rigshospitalet,<br>Copenhagen, Denmark                        | Department of Epidemiology Research, Statens<br>Serum Institut, Copenhagen, Denmark |
| Daniel                        | Gudbjartsson          | Daniel.Gudbjartsson@<br>decode.is    | deCODE Genetics, Reykjavik, Iceland                                                                                                 |                                                                                     |
| Thomas<br>Folkmann            | Hansen                | thomas.hansen@regio<br>nh.dk         | Danish Headache Center, Department of<br>Neurology, Copenhagen University Hospital,<br>Rigshospitalet-Glostrup, Copenhagen, Denmark |                                                                                     |
| Lotte                         | Hindhede              | LOTHIN@rm.dk                         | Department of Clinical Immunology, Aarhus<br>University Hospital, Aarhus, Denmark                                                   |                                                                                     |
| Henrik                        | Hjalgrim              | HHJ@cancer.dk                        | Danish Cancer Society Research Center,<br>Copenhagen, Denmark                                                                       | Department of Epidemiology Research, Statens<br>Serum Institut, Copenhagen, Denmark |
| Rikke Louise                  | Jacobsen              | rikke.louise.jacobsen@<br>regionh.dk | Department of Clinical Immunology,<br>Copenhagen University Hospital, Rigshospitalet,<br>Copenhagen, Denmark                        |                                                                                     |
| Gregor                        | Jemec                 | gbj@regionsjaelland.d<br>k           | Department of Dermatology, Zealand University<br>hospital, Roskilde, Denmark                                                        |                                                                                     |
| Bitten Aagaard                | Jensen                | biaaj@rn.dk                          | Department of Clinical Immunology, Aalborg<br>University Hospital, Aalborg, Denmark                                                 |                                                                                     |
| Katrine<br>Bertram<br>Dalskov | Kaspersen<br>Kjerulff | kathkasp@rm.dk<br>berkje@rm.dk       | Department of Clinical Immunology, Aarhus<br>University Hospital, Aarhus, Denmark                                                   |                                                                                     |
| Lisette                       | Kogelman              | Lisette.kogelman@regi<br>onh.dk      | Danish Headache Center, Department of<br>Neurology, Copenhagen University Hospital,<br>Rigshospitalet-Glostrup, Copenhagen, Denmark |                                                                                     |



|                    |               |                                       |                                                                                                                                                     |                                                                                                                              |
|--------------------|---------------|---------------------------------------|-----------------------------------------------------------------------------------------------------------------------------------------------------|------------------------------------------------------------------------------------------------------------------------------|
| Margit Anita Hørup | Larsen        | Margit.Anita.Hoerup.Larsen@regionh.dk | Department of Clinical Immunology,<br>Copenhagen University Hospital, Rigshospitalet,<br>Copenhagen, Denmark                                        |                                                                                                                              |
| Ioannis            | Louloudis     | ioannis.louloudis@cpr.ku.dk           | Novo Nordisk Foundation Center for Protein<br>Research, Faculty of Health and Medical Sciences,<br>University of Copenhagen, Copenhagen,<br>Denmark |                                                                                                                              |
| Agnete             | Lundgaard     | agnete.lundgaard@cpr.ku.dk            | Novo Nordisk Foundation Center for Protein<br>Research, Faculty of Health and Medical Sciences,<br>University of Copenhagen, Copenhagen,<br>Denmark |                                                                                                                              |
| Susan              | Mikkelsen     | susanmke@rm.dk                        | Department of Clinical Immunology, Aarhus<br>University Hospital, Aarhus, Denmark                                                                   |                                                                                                                              |
| Christina          | Mikkelsen     | christina.mikkelsen@regionh.dk        | Department of Clinical Immunology,<br>Copenhagen University Hospital, Rigshospitalet,<br>Copenhagen, Denmark                                        |                                                                                                                              |
| Ioanna             | Nissen        | ioanna.nissen@regionh.dk              | Department of Clinical Immunology,<br>Copenhagen University Hospital, Rigshospitalet,<br>Copenhagen, Denmark                                        |                                                                                                                              |
| Mette              | Nyegaard      | nyegaard@hst.aau.dk                   | Department of Health Science and Technology,<br>Faculty of Medicine, Aalborg Univeristy, Aalborg,<br>Denmark                                        |                                                                                                                              |
| Sisse Rye          | Ostrowski     | sisse.rye.ostrowski@regionh.dk        | Department of Clinical Immunology,<br>Copenhagen University Hospital, Rigshospitalet,<br>Copenhagen, Denmark                                        | Department of Clinical Medicine, Faculty of Health<br>and Medical Sciences, University of Copenhagen,<br>Copenhagen, Denmark |
| Ole Birger         | Pedersen      | olbp@regionsjaelland.dk               | Department of Clinical Immunology, Zealand<br>University Hospital, Køge, Denmark                                                                    | Department of Clinical Medicine, Faculty of Health<br>and Medical Sciences, University of Copenhagen,<br>Copenhagen, Denmark |
| Alexander          | Pil Henriksen | alexander.henriksen@cpr.ku.dk         | Novo Nordisk Foundation Center for Protein<br>Research, Faculty of Health and Medical Sciences,<br>University of Copenhagen, Copenhagen,<br>Denmark |                                                                                                                              |

|             |                  |                                      |                                                                                                                                                     |                                                                                                                              |
|-------------|------------------|--------------------------------------|-----------------------------------------------------------------------------------------------------------------------------------------------------|------------------------------------------------------------------------------------------------------------------------------|
| Palle Duun  | Rohde            | palledr@hst.aau.dk                   | Department of Health Science and Technology,<br>Faculty of Medicine, Aalborg Univeristy, Aalborg,<br>Denmark                                        |                                                                                                                              |
| Klaus       | Rostgaard        | klar@cancer.dk                       | Danish Cancer Society Research Center,<br>Copenhagen, Denmark                                                                                       | Department of Epidemiology Research, Statens<br>Serum Institut, Copenhagen, Denmark                                          |
| Michael     | Schwinn          | michael.schwinn@regi<br>onh.dk       | Department of Clinical Immunology,<br>Copenhagen University Hospital, Rigshospitalet,<br>Copenhagen, Denmark                                        |                                                                                                                              |
| Kari        | Stefansson       | kari.stefansson@deco<br>de.is        | deCODE Genetics, Reykjavik, Iceland                                                                                                                 |                                                                                                                              |
| Hreinn      | Stefánsson       | hreinn.stefansson@de<br>code.is      | deCODE Genetics, Reykjavik, Iceland                                                                                                                 |                                                                                                                              |
| Erik        | Sørensen         | Erik.Soerensen@regio<br>nh.dk        | Department of Clinical Immunology,<br>Copenhagen University Hospital, Rigshospitalet,<br>Copenhagen, Denmark                                        |                                                                                                                              |
| Unnur       | Þorsteinsdóttir  | Unnur.Thorsteinsdottir<br>@decode.is | deCODE Genetics, Reykjavik, Iceland                                                                                                                 |                                                                                                                              |
| Lise Wegner | Thørner          | Lise.Wegner.Thoerner<br>@regionh.dk  | Department of Clinical Immunology,<br>Copenhagen University Hospital, Rigshospitalet,<br>Copenhagen, Denmark                                        |                                                                                                                              |
| Mie         | Topholm<br>Bruun | mie.topholm.bruun@r<br>syd.dk        | Department of Clinical Immunology, Odense<br>University Hospital, Odense, Denmark                                                                   |                                                                                                                              |
| Henrik      | Ullum            | HEUL@ssi.dk                          | Statens Serum Institut, Copenhagen, Denmark                                                                                                         |                                                                                                                              |
| Thomas      | Werge            | thomas.werge@region<br>h.dk          | Institute of Biological Psychiatry, Mental Health<br>Centre, Sct. Hans, Copenhagen University<br>Hospital, Roskilde, Denmark                        | Department of Clinical Medicine, Faculty of Health<br>and Medical Sciences, University of Copenhagen,<br>Copenhagen, Denmark |
| David       | Westergaard      | david.westergaard@cp<br>r.ku.dk      | Novo Nordisk Foundation Center for Protein<br>Research, Faculty of Health and Medical Sciences,<br>University of Copenhagen, Copenhagen,<br>Denmark |                                                                                                                              |
